# Supplementary material for: SNF5 Is an Essential Executor of Epigenetic Regulation during Differentiation
Source: PubMed Central journal article supplement (PMC3636213; doi:10.1371/journal.pgen.1003459), 2013-04-25

A

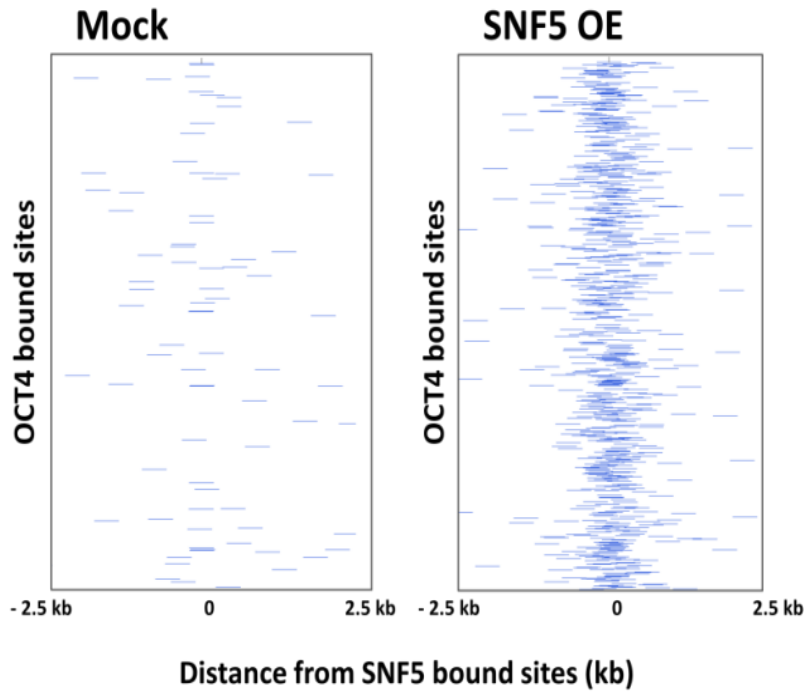

B

| Human                | Mouse | Brg1 bound genes | not Brg1 bound genes | All   |
|----------------------|-------|------------------|----------------------|-------|
| SNF5 bound genes     |       | 2400             | 4951                 | 7351  |
| not SNF5 bound genes |       | 1601             | 6626                 | 8227  |
| All                  |       | 4001             | 11577                | 15578 |

C

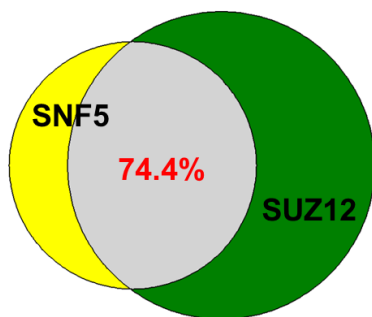

Supplement: pgen.1003459.s005.pdf [file pgen.1003459.s005.pdf]
