# Supplementary material for: SNF5 Is an Essential Executor of Epigenetic Regulation during Differentiation
Source: PubMed Central journal article supplement (PMC3636213; doi:10.1371/journal.pgen.1003459), 2013-04-25

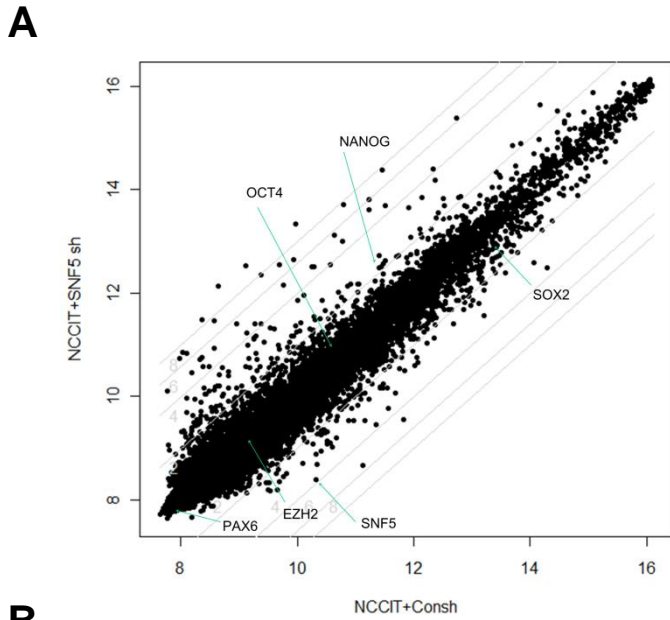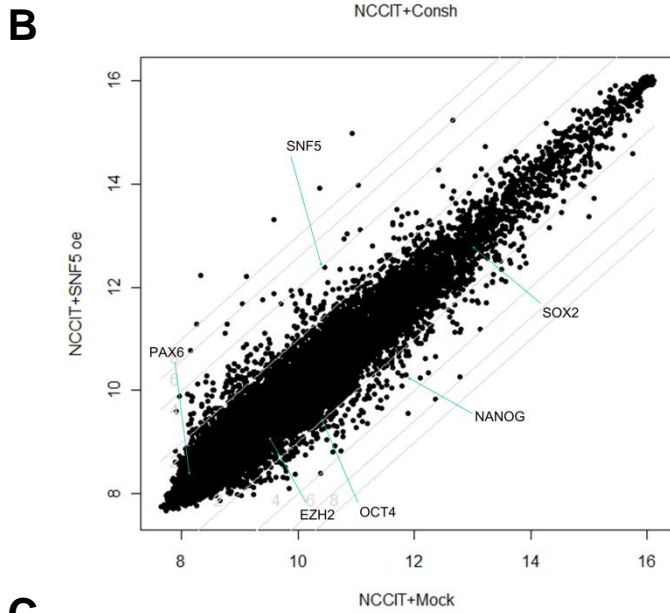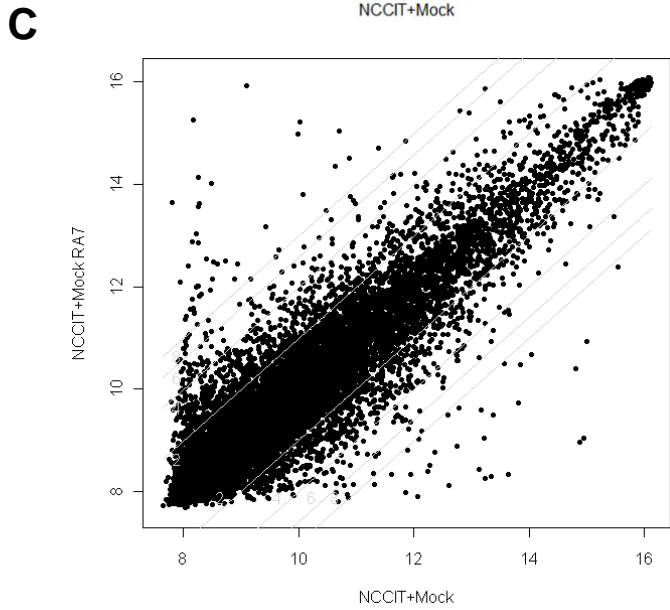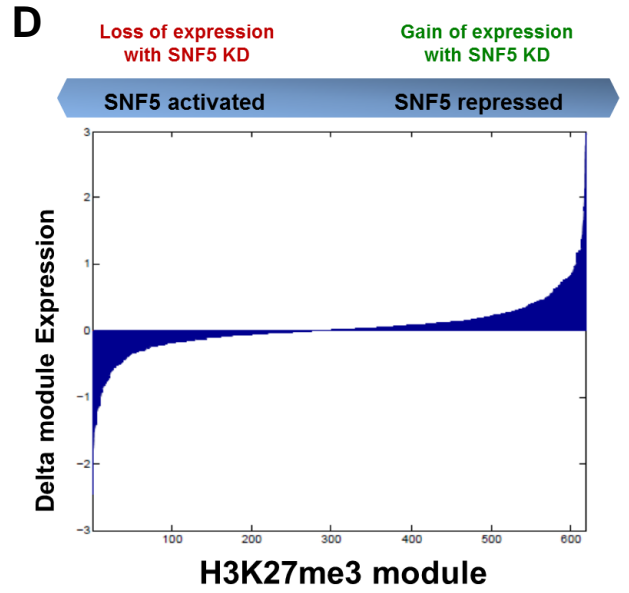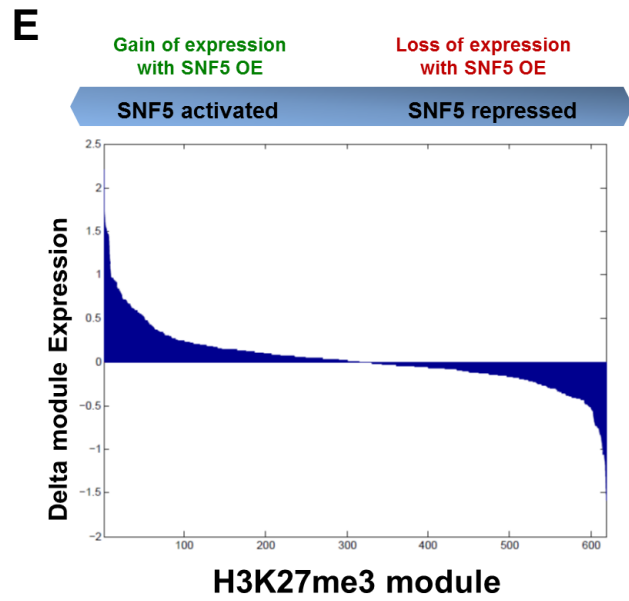

Supplement: pgen.1003459.s006.pdf [file pgen.1003459.s006.pdf]
