# Supplementary material for: SNF5 Is an Essential Executor of Epigenetic Regulation during Differentiation
Source: PLoS Genet. 2013 Apr 25;9(4):e1003459. doi: 10.1371/journal.pgen.1003459 (PMC3636213; doi:10.1371/journal.pgen.1003459)
Supplement: Table S5 — The gene list of SNF5 level with RA treatment. (XLSX) [file pgen.1003459.s011.xlsx]

## Sheet: gain in SNF5oe
	NCCIT SNF5oe	NCCIT E/V	E/V-SNF5oe	TargetID	GENOME_BUILD	CHR	MAPINFO	CHROMOSOME_36	COORDINATE_36	UCSC_REFGENE_NAME	UCSC_REFGENE_ACCESSION	UCSC_REFGENE_GROUP	RELATION_TO_UCSC_CPG_ISLAND	ENHANCER	REGULATORY_FEATURE_GROUP
cg18792536	0.651104	0.216146	-0.434958	cg18792536	37	7	76145562	7	75983498	UPK3B;UPK3B	NM_182684;NM_030570	3'UTR;3'UTR	Island		Unclassified
cg00134041	0.924795	0.566038	-0.358757	cg00134041	37	12	133529909	12	132039982	ZNF605;ZNF605	NM_001164715;NM_183238	5'UTR;5'UTR	N_Shelf
cg03563385	0.391952	0.0472155	-0.344737	cg03563385	37	19	6516369	19	6467369				N_Shore	TRUE	Promoter_Associated
cg27528091	0.559984	0.236236	-0.323747	cg27528091	37	6	27447518	6	27555497						Promoter_Associated
cg21921829	0.900494	0.603604	-0.29689	cg21921829	37	7	116850153	7	116637389	ST7;ST7	NM_018412;NM_021908	Body;Body		TRUE
cg18902930	0.393531	0.0974265	-0.296105	cg18902930	37	19	10400308	19	10261308	ICAM5	NM_003259	TSS1500	Island	TRUE
cg22084460	0.85822	0.564197	-0.294023	cg22084460	37	19	13348050	19	13209050	CACNA1A;CACNA1A	NM_001127222;NM_001127221	Body;Body	S_Shore		Unclassified_Cell_type_specific
ch.7.1700983F	0.755113	0.470944	-0.28417	ch.7.1700983F	36	7	77269758	7	77107693
cg01745726	0.294726	0.0265978	-0.268129	cg01745726	37	22	24129337	22	22459337	SMARCB1;SMARCB1;SMARCB1;SMARCB1	NM_003073;NM_001007468;NM_001007468;NM_003073	1stExon;5'UTR;1stExon;5'UTR	Island		Promoter_Associated
cg09314196	0.60856	0.342657	-0.265903	cg09314196	37	19	22816508	19	22608348	ZNF492	NM_020855	TSS1500	N_Shore
cg11737318	0.969983	0.707064	-0.262919	cg11737318	37	8	131440305	8	131509487
cg15809806	0.88777	0.625	-0.26277	cg15809806	37	10	33518295	10	33558301	NRP1;NRP1;NRP1	NM_001024628;NM_003873;NM_001024629	Body;Body;Body		TRUE
cg00653700	0.702772	0.446154	-0.256618	cg00653700	37	13	95601186	13	94399187					TRUE
cg15620734	0.948905	0.693694	-0.255211	cg15620734	37	10	134171782	10	134021772	LRRC27;LRRC27;LRRC27	NM_001143757;NM_030626;NR_026559	Body;Body;Body
cg14303122	0.965922	0.711823	-0.2541	cg14303122	37	20	54987270	20	54420677	CASS4;CASS4;CASS4;CASS4	NM_001164115;NM_020356;NM_001164116;NM_001164114	TSS200;TSS200;5'UTR;TSS200		TRUE	Promoter_Associated_Cell_type_specific
cg13617280	0.936031	0.682186	-0.253845	cg13617280	37	12	129299462	12	127865415	SLC15A4;MGC16384	NM_145648;NR_026666	Body;TSS200
cg06644515	0.553251	0.301912	-0.251339	cg06644515	37	1	173834831	1	172101454	SNORD47;GAS5;SNORD81;SNORD80;SNORD78;SNORD79	NR_002746;NR_002578;NR_003938;NR_003940;NR_003944;NR_003939	TSS1500;Body;TSS1500;TSS1500;TSS200;TSS1500	N_Shelf
cg15999104	0.965085	0.717411	-0.247674	cg15999104	37	3	93780377	3	95263067	NSUN3;DHFRL1	NM_022072;NM_176815	TSS1500;5'UTR	N_Shore
cg26663796	0.823529	0.584077	-0.239452	cg26663796	37	17	80255734	17	77849023					TRUE	Promoter_Associated
cg11191979	0.975973	0.737361	-0.238612	cg11191979	37	1	2194050	1	2183910	SKI	NM_003036	Body
cg17040924	0.674443	0.436718	-0.237724	cg17040924	37	11	4565489	11	4522065	OR52M1	NM_001004137	TSS1500
cg18014500	0.66464	0.42794	-0.2367	cg18014500	37	10	114074843	10	114064833	GUCY2G	NR_028134	Body			Unclassified_Cell_type_specific
cg15870379	0.895111	0.660251	-0.23486	cg15870379	37	5	108099747	5	108127646	FER	NM_005246	5'UTR		TRUE
cg18070504	0.8887	0.656038	-0.232662	cg18070504	37	3	11187858	3	11162858	HRH1	NM_001098213	5'UTR		TRUE
cg04616155	0.865481	0.634076	-0.231405	cg04616155	37	2	227567405	2	227275649					TRUE
cg23220420	0.665895	0.436526	-0.229369	cg23220420	37	2	10153777	2	10071228
cg03309938	0.478171	0.250737	-0.227434	cg03309938	37	11	122930448	11	122435658	HSPA8;HSPA8	NM_006597;NM_153201	Body;Body	N_Shore
cg09322573	0.871892	0.644864	-0.227028	cg09322573	37	8	28961356	8	29017275	KIF13B	NM_015254	Body
ch.14.569218R	0.865323	0.638846	-0.226478	ch.14.569218R	36	14	51107454	14	50177203	SAV1	NM_021818	Body
cg14200954	0.925556	0.701754	-0.223802	cg14200954	37	9	103239817	9	102279638	TMEFF1	NM_003692	Body	S_Shelf
cg24605288	0.805068	0.582645	-0.222424	cg24605288	37	7	84628407	7	84466343	SEMA3D	NM_152754	3'UTR		TRUE
cg10519906	0.948753	0.726384	-0.222369	cg10519906	37	6	34563243	6	34671221	C6orf106;C6orf106	NM_024294;NM_022758	Body;Body		TRUE
cg15874048	0.862252	0.64006	-0.222191	cg15874048	37	14	45369753	14	44439503	C14orf28	NM_001017923	Body	S_Shelf
cg00374056	0.908046	0.68597	-0.222076	cg00374056	37	8	67872678	8	68035232				N_Shore
cg19714308	0.882647	0.660724	-0.221922	cg19714308	37	18	75996301	18	74097289				N_Shelf
cg13944468	0.402612	0.181658	-0.220954	cg13944468	37	5	2753852	5	2806852	C5orf38	NM_178569	Body	Island
cg03979008	0.349155	0.12996	-0.219194	cg03979008	37	22	24129419	22	22459419	SMARCB1;SMARCB1	NM_003073;NM_001007468	1stExon;1stExon	Island		Promoter_Associated
cg23817637	0.828947	0.609808	-0.219139	cg23817637	37	10	129691429	10	129581419	CLRN3	NM_152311	TSS1500
cg17723355	0.233455	0.0156827	-0.217772	cg17723355	37	10	17685698	10	17725704	STAM	NM_003473	TSS1500	N_Shore		Promoter_Associated
cg13610421	0.856604	0.639752	-0.216852	cg13610421	37	7	100134176	7	99972112				N_Shelf
cg10596956	0.915187	0.698473	-0.216714	cg10596956	37	11	4566380	11	4522956	OR52M1	NM_001004137	TSS200
cg03044573	0.489569	0.274002	-0.215567	cg03044573	37	1	173835265	1	172101888	GAS5;SNORD78;SNORD44;SNORD80;SNORD79	NR_002578;NR_003944;NR_002750;NR_003940;NR_003939	Body;TSS1500;TSS200;TSS1500;TSS1500	N_Shore
cg27324781	0.842105	0.628667	-0.213438	cg27324781	37	16	76272351	16	74829852				S_Shelf
cg02802508	0.911257	0.697892	-0.213365	cg02802508	37	Y	9214477	Y	9274477	TSPY4;FAM197Y2;TSPY4	NM_001164471;NR_001553;NM_001164471	TSS1500;TSS1500;Body	N_Shore
cg05201777	0.864809	0.652324	-0.212486	cg05201777	37	10	112598561	10	112588551	RBM20	NM_001134363	3'UTR
cg07261186	0.812817	0.600464	-0.212354	cg07261186	37	10	81070689	10	80740695	ZMIZ1	NM_020338	Body
cg26842121	0.700753	0.489186	-0.211567	cg26842121	37	13	95358205	13	94156206				N_Shore
cg15108334	0.673028	0.462002	-0.211025	cg15108334	37	6	133137167	6	133178860	RPS12;SNORD100;SNORA33	NM_001016;NR_002435;NR_002436	Body;TSS1500;TSS1500	S_Shore
cg05166302	0.773379	0.563415	-0.209964	cg05166302	37	7	39666811	7	39633336	RALA	NM_005402	5'UTR	S_Shelf
cg23620433	0.375993	0.166802	-0.209191	cg23620433	37	14	58894395	14	57964148	KIAA0586;TIMM9	NM_014749;NM_012460	TSS1500;TSS200	S_Shore		Promoter_Associated
cg21222187	0.858607	0.653422	-0.205185	cg21222187	37	13	32258346	13	31156346					TRUE
cg11240230	0.96633	0.761251	-0.205079	cg11240230	37	10	33250294	10	33290300				S_Shelf
cg18082082	0.907779	0.703895	-0.203885	cg18082082	37	6	49937814	6	50045773	DEFB113	NM_001037729	TSS1500
cg16020428	0.82679	0.623283	-0.203507	cg16020428	37	4	39043791	4	38720186				N_Shelf
cg00735137	0.906991	0.703843	-0.203148	cg00735137	37	7	17408595	7	17375120					TRUE
cg26960543	0.815476	0.612619	-0.202857	cg26960543	37	7	3256369	7	3222895
cg02392269	0.929286	0.727158	-0.202128	cg02392269	37	11	12491646	11	12448222	PARVA	NM_018222	Body		TRUE
cg07054226	0.894713	0.693512	-0.2012	cg07054226	37	10	116410691	10	116400681	ABLIM1;ABLIM1;ABLIM1	NM_001003408;NM_001003407;NM_002313	Body;Body;Body
cg19939732	0.882488	0.681325	-0.201163	cg19939732	37	3	169801806	3	171284500	GPR160	NM_014373	Body
cg07680042	0.922963	0.722222	-0.200741	cg07680042	37	11	12203294	11	12159870	MICAL2	NM_014632	Body		TRUE

## Sheet: lose in SNF5oe
	NCCIT SNF5oe	NCCIT E/V	E/V-SNF5oe	TargetID	GENOME_BUILD	CHR	MAPINFO	CHROMOSOME_36	COORDINATE_36	UCSC_REFGENE_NAME	UCSC_REFGENE_ACCESSION	UCSC_REFGENE_GROUP	RELATION_TO_UCSC_CPG_ISLAND	ENHANCER	REGULATORY_FEATURE_GROUP
cg27271486	0.4475	0.647529	0.200029	cg27271486	37	16	56227690	16	54785191	DKFZP434H168;GNAO1;GNAO1	NR_026889;NM_020988;NM_138736	Body;Body;Body	S_Shore
cg23530596	0.617451	0.817594	0.200143	cg23530596	37	15	48515109	15	46302401	SLC12A1	NM_000338	Body
cg17439694	0.540434	0.740599	0.200165	cg17439694	37	3	148939523	3	150422213	CP	NM_000096	1stExon
cg07743179	0.531811	0.732042	0.200231	cg07743179	37	3	126278943	3	127761633	C3orf22	NM_152533	TSS1500
cg24780240	0.550514	0.75076	0.200246	cg24780240	37	X	68052409	X	67969134	EFNB1	NM_004429	Body	S_Shelf		Unclassified_Cell_type_specific
cg27606396	0.301154	0.501472	0.200318	cg27606396	37	2	113542117	2	113258588	IL1A;IL1A	NM_000575;NM_000575	1stExon;5'UTR		TRUE
cg19291696	0.560644	0.760982	0.200338	cg19291696	37	13	27769437	13	26667437					TRUE
cg13264672	0.356998	0.557486	0.200488	cg13264672	37	7	39993440	7	39959965	CDK13;CDK13	NM_031267;NM_003718	Body;Body	S_Shore
cg15848890	0.654812	0.855319	0.200507	cg15848890	37	4	3651471	4	3621269
cg27548075	0.223529	0.424091	0.200562	cg27548075	37	X	51638041	X	51654781	MAGED1;MAGED1;MAGED1	NM_006986;NM_001005333;NM_001005332	Body;Body;Body	Island
cg13192819	0.657363	0.85794	0.200577	cg13192819	37	X	71433263	X	71349988	ERCC6L;PIN4	NM_017669;NM_001170747	Body;Body
cg00206463	0.625453	0.82623	0.200777	cg00206463	37	6	30179435	6	30287414	TRIM26	NM_003449	5'UTR	N_Shore
cg01870519	0.379544	0.580516	0.200972	cg01870519	37	6	693728	6	638728	EXOC2	NM_018303	TSS1500	S_Shore		Promoter_Associated
cg25556225	0.617544	0.818615	0.201071	cg25556225	37	15	31515750	15	29303042					TRUE
cg08568767	0.493284	0.694411	0.201127	cg08568767	37	10	133606037	10	133456027
cg23685967	0.630225	0.831424	0.201199	cg23685967	37	11	1308758	11	1265334	TOLLIP	NM_019009	Body	N_Shelf
cg02889647	0.480406	0.681623	0.201217	cg02889647	37	1	152879586	1	151146210	IVL	NM_005547	TSS1500
cg13683361	0.545145	0.746424	0.201279	cg13683361	37	9	103793011	9	102832832	LPPR1	NM_207299	5'UTR	S_Shore
cg23876149	0.520493	0.72178	0.201286	cg23876149	37	19	292271	19	243271	PPAP2C;PPAP2C;PPAP2C	NM_177526;NM_003712;NM_177543	TSS1500;TSS1500;TSS1500	S_Shore
cg15331096	0.58936	0.790676	0.201316	cg15331096	37	17	29861932	17	26886052	RAB11FIP4	NM_032932	3'UTR		TRUE
cg08856318	0.316246	0.51759	0.201344	cg08856318	37	10	45474339	10	44794345	C10orf10;RASSF4	NM_007021;NM_032023	TSS200;Body			Unclassified_Cell_type_specific
cg01824652	0.581487	0.78286	0.201373	cg01824652	37	8	75653980	8	75816535					TRUE
cg04563766	0.109463	0.311088	0.201625	cg04563766	37	9	71627524	9	70817344	PRKACG;PRKACG	NM_002732;NM_002732	3'UTR;1stExon	N_Shore
cg10499172	0.485932	0.687573	0.201642	cg10499172	37	11	126173246	11	125678456	DCPS	NM_014026	TSS1500	N_Shore		Promoter_Associated
cg05153791	0.472672	0.67434	0.201668	cg05153791	37	1	197116622	1	195383245	ASPM	NM_018136	TSS1500
cg23931049	0.593564	0.795314	0.201749	cg23931049	37	18	21452730	18	19706728	LAMA3;LAMA3;LAMA3;LAMA3	NM_000227;NM_001127718;NM_198129;NM_001127717	TSS1500;TSS1500;Body;Body
cg16901082	0.123543	0.325439	0.201896	cg16901082	37	8	26435609	8	26491526	DPYSL2;DPYSL2	NM_001386;NM_001386	5'UTR;1stExon	Island		Promoter_Associated
cg21026199	0.619235	0.821138	0.201903	cg21026199	37	4	174912278	4	175148853						Unclassified_Cell_type_specific
cg14518346	0.240672	0.442677	0.202006	cg14518346	37	13	100544910	13	99342911	CLYBL	NM_206808	3'UTR	N_Shelf	TRUE
cg25043633	0.709707	0.911724	0.202017	cg25043633	37	6	170061104	6	169803029	WDR27	NM_182552	Body	N_Shore
cg13693646	0.642436	0.844519	0.202083	cg13693646	37	9	68410538	9	67900358				N_Shore
cg08928494	0.422244	0.624343	0.202098	cg08928494	37	16	87952163	16	86509664	CA5A	NM_001739	Body	S_Shelf
cg25198049	0.577714	0.779824	0.20211	cg25198049	37	1	151509723	1	149776347	CGN	NM_020770	Body	N_Shelf
cg16903782	0.61874	0.821063	0.202323	cg16903782	37	12	55378654	12	53664921	KIAA0748	NM_001136030	TSS200			Promoter_Associated
cg14024579	0.216283	0.418624	0.202342	cg14024579	37	9	139332845	9	138452666	INPP5E	NM_019892	Body	Island
cg19992474	0.584592	0.78694	0.202348	cg19992474	37	7	154985807	7	154616740
cg21251452	0.191165	0.393625	0.202461	cg21251452	37	6	27145027	6	27253006				N_Shore		Unclassified
cg06935052	0.312544	0.515071	0.202527	cg06935052	37	22	24176449	22	22506449	SMARCB1;SMARCB1	NM_001007468;NM_003073	3'UTR;3'UTR
cg23160142	0.593092	0.795659	0.202567	cg23160142	37	10	120154512	10	120144502					TRUE
cg10993701	0.288479	0.491349	0.20287	cg10993701	37	12	51660035	12	49946302	SMAGP;SMAGP	NM_001033873;NM_001031628	Body;Body	N_Shelf
cg24949632	0.606924	0.809932	0.203008	cg24949632	37	4	47032678	4	46727435	GABRB1	NM_000812	TSS1500	N_Shore
cg24722326	0.578192	0.781229	0.203037	cg24722326	37	7	116147950	7	115935186	CAV2;CAV2	NM_001233;NM_198212	3'UTR;3'UTR
cg19837815	0.342345	0.545429	0.203084	cg19837815	37	7	150026909	7	149657842	C7orf29;LRRC61;LRRC61	NM_138434;NM_023942;NM_001142928	TSS200;5'UTR;5'UTR		TRUE
cg09757049	0.532269	0.735612	0.203342	cg09757049	37	10	131334866	10	131224856	MGMT	NM_002412	Body
cg25595431	0.716733	0.920092	0.20336	cg25595431	37	6	166261900	6	166181890
cg02046532	0.463798	0.667329	0.20353	cg02046532	37	20	207858	20	155858	DEFB129	NM_080831	TSS200
cg18486231	0.541376	0.744909	0.203533	cg18486231	37	14	21156471	14	20226311	RNASE4;ANG;ANG;RNASE4	NM_194431;NM_001097577;NM_001145;NM_002937	TSS1500;TSS1500;5'UTR;5'UTR	S_Shelf
cg01033191	0.56585	0.769403	0.203553	cg01033191	37	10	62488850	10	62158856				N_Shelf
cg22799069	0.476275	0.679834	0.203558	cg22799069	37	3	11764385	3	11739385				S_Shelf
cg02678768	0.350808	0.554481	0.203673	cg02678768	37	17	74002944	17	71514539	EVPL	NM_001988	3'UTR	N_Shore		Unclassified
cg13173415	0.162201	0.365943	0.203743	cg13173415	37	11	12065669	11	12022245					TRUE
cg19747960	0.251488	0.455326	0.203838	cg19747960	37	8	11269117	8	11306527	C8orf12	NR_026814	Body		TRUE	Unclassified
cg23351738	0.423545	0.627446	0.2039	cg23351738	37	6	31589926	6	31697905	SNORA38;BAT2	NR_002971;NM_080686	TSS1500;5'UTR	S_Shore
cg16951533	0.63894	0.842863	0.203924	cg16951533	37	6	155361528	6	155403220					TRUE
cg03804255	0.427222	0.631248	0.204026	cg03804255	37	12	90278335	12	88802466					TRUE
cg22481695	0.576862	0.780909	0.204046	cg22481695	37	7	127035858	7	126823094				S_Shelf
cg24606762	0.164146	0.368194	0.204048	cg24606762	37	20	61806972	20	61277417				Island	TRUE
cg07879681	0.617976	0.822162	0.204187	cg07879681	37	13	112336027	13	111134028
cg10080250	0.269212	0.473398	0.204187	cg10080250	37	15	65426671	15	63213724	PDCD7	NM_005707	TSS1500	S_Shore		Promoter_Associated
cg23846712	0.288158	0.492481	0.204323	cg23846712	37	19	3607608	19	3558608	TBXA2R;TBXA2R	NM_201636;NM_001060	TSS1500;TSS1500	S_Shore	TRUE	Unclassified
cg07150255	0.407698	0.612121	0.204423	cg07150255	37	6	29324414	6	29432393	OR5V1	NM_030876	TSS1500
cg05633523	0.607935	0.812421	0.204486	cg05633523	37	15	102156835	15	99974358					TRUE
cg09921555	0.386009	0.590672	0.204662	cg09921555	37	20	43590026	20	43023440	TOMM34	NM_006809	TSS1500	S_Shore
cg10448724	0.456989	0.661844	0.204855	cg10448724	37	10	532791	10	522791	DIP2C	NM_014974	Body	S_Shore
cg11469308	0.617191	0.822179	0.204988	cg11469308	37	2	217471906	2	217180151
cg16380885	0.488916	0.69392	0.205005	cg16380885	37	5	17219936	5	17272936	BASP1	NM_006317	5'UTR	S_Shore
cg15454486	0.378881	0.583912	0.205031	cg15454486	37	2	192543810	2	192252055	OBFC2A;OBFC2A	NR_024415;NM_001031716	Body;Body	S_Shore
cg11267546	0.429536	0.634686	0.20515	cg11267546	37	7	27167828	7	27134353	HOXA3	NM_153631	TSS1500	N_Shore
cg18631301	0.672562	0.877937	0.205375	cg18631301	37	5	15521782	5	15574782	FBXL7	NM_012304	Body		TRUE
cg10407488	0.563669	0.769231	0.205562	cg10407488	37	11	120255253	11	119760463	ARHGEF12	NM_015313	Body
cg21569693	0.499626	0.705224	0.205598	cg21569693	37	15	40422098	15	38209390
cg11308338	0.196353	0.40198	0.205628	cg11308338	37	4	185459395	4	185696389						Promoter_Associated
cg18471471	0.691605	0.897273	0.205667	cg18471471	37	15	100537686	15	98355209	ADAMTS17	NM_139057	Body
cg09741912	0.603693	0.809382	0.20569	cg09741912	37	11	114921894	11	114427104					TRUE
cg24918767	0.585795	0.791489	0.205694	cg24918767	37	4	88297189	4	88516213	HSD17B11	NM_016245	Body			Gene_Associated_Cell_type_specific
cg19443750	0.65445	0.860252	0.205802	cg19443750	37	13	112996588	13	112044589				N_Shore
cg08756614	0.566679	0.77254	0.205861	cg08756614	37	16	5263828	16	5203829					TRUE
cg07790176	0.518258	0.72432	0.206062	cg07790176	37	13	92601293	13	91399294	GPC5	NM_004466	Body
cg07876051	0.667172	0.873303	0.206131	cg07876051	37	10	3159145	10	3149145	PFKP	NM_002627	Body	N_Shore
cg17090754	0.464521	0.670657	0.206136	cg17090754	37	13	111107075	13	109905076	COL4A2	NM_001846	Body	N_Shelf	TRUE	Unclassified
cg23085281	0.500298	0.706512	0.206214	cg23085281	37	10	49459949	10	49129955	FRMPD2;FRMPD2	NM_152428;NM_001018071	Body;Body		TRUE
cg02228294	0.545735	0.751989	0.206255	cg02228294	37	16	83882901	16	82440402					TRUE
cg24646359	0.220296	0.426748	0.206452	cg24646359	37	10	102288877	10	102278867	NDUFB8	NM_005004	Body	N_Shore
cg14384803	0.39055	0.59714	0.206589	cg14384803	37	9	139040286	9	138180107						Unclassified_Cell_type_specific
cg13175736	0.505028	0.711666	0.206638	cg13175736	37	15	62537871	15	60325163
cg11301215	0.67832	0.885217	0.206898	cg11301215	37	4	647480	4	637480	PDE6B;PDE6B;PDE6B	NM_001145292;NM_000283;NM_001145291	5'UTR;Body;Body	S_Shore
cg14108581	0.662064	0.869073	0.207009	cg14108581	37	2	1426094	2	1405101	TPO;TPO;TPO;TPO	NM_175719;NM_000547;NM_175721;NM_175722	Body;Body;Body;Body
cg16118839	0.39772	0.604739	0.207019	cg16118839	37	11	88069169	11	87708817	CTSC;CTSC;CTSC	NM_148170;NM_001114173;NM_001814	Body;Body;Body	N_Shore		Promoter_Associated_Cell_type_specific
cg10281996	0.645347	0.85237	0.207024	cg10281996	37	11	69290977	11	69000158					TRUE
cg08707988	0.486817	0.693926	0.207109	cg08707988	37	6	32852998	6	32960976						Unclassified
cg15993281	0.61191	0.819167	0.207257	cg15993281	37	12	130624096	12	129190049				S_Shore
cg10013142	0.524032	0.731318	0.207286	cg10013142	37	14	104183439	14	103253192	ZFYVE21	NM_024071	Body	S_Shore
cg10033675	0.190789	0.398115	0.207326	cg10033675	37	2	172015098	2	171723344	TLK1;TLK1	NM_012290;NM_001136554	Body;5'UTR	N_Shore
cg02788233	0.636045	0.84344	0.207394	cg02788233	37	3	61976174	3	61951214	PTPRG	NM_002841	Body		TRUE
cg25160605	0.448167	0.655596	0.207429	cg25160605	37	11	21087846	11	21044422	NELL1;NELL1	NM_006157;NM_201551	Body;Body		TRUE
cg04954894	0.145563	0.353022	0.207459	cg04954894	37	8	38089920	8	38209077	DDHD2;DDHD2;DDHD2	NM_001164232;NM_015214;NM_001164234	5'UTR;5'UTR;5'UTR	Island
cg12169771	0.518184	0.72573	0.207546	cg12169771	37	6	29768248	6	29876227				Island
cg09103658	0.647675	0.855222	0.207547	cg09103658	37	17	78442672	17	76057267	NPTX1	NM_002522	3'UTR	Island
cg06868511	0.217195	0.424828	0.207634	cg06868511	37	13	27504562	13	26402562						Unclassified
cg14003693	0.631013	0.838688	0.207675	cg14003693	37	9	14308247	9	14298247	NFIB	NM_005596	Body
cg18050804	0.351655	0.559397	0.207742	cg18050804	37	13	113677188	13	112725189	MCF2L;MCF2L	NM_001112732;NM_024979	Body;Body	N_Shore	TRUE
cg20616060	0.240872	0.448735	0.207863	cg20616060	37	4	99479630	4	99698653	TSPAN5	NM_005723	Body		TRUE
cg08251704	0.626527	0.834603	0.208076	cg08251704	37	2	234296312	2	233961051	DGKD;DGKD	NM_152879;NM_003648	Body;TSS1500		TRUE
cg23182840	0.577863	0.78603	0.208167	cg23182840	37	3	4344661	3	4319661	SETMAR;SETMAR	NR_024022;NM_006515	TSS1500;TSS1500	N_Shore		Promoter_Associated
cg20754708	0.307973	0.516334	0.208361	cg20754708	37	3	193419842	3	194902536					TRUE
cg21783672	0.689312	0.8977	0.208389	cg21783672	37	7	99137009	7	98974945				N_Shelf
cg01152056	0.62973	0.838206	0.208476	cg01152056	37	6	166260319	6	166180309					TRUE
cg04645534	0.191138	0.399872	0.208733	cg04645534	37	8	23712550	8	23768495	STC1	NM_003155	TSS1500
cg01598421	0.696777	0.90552	0.208743	cg01598421	37	8	134132043	8	134201225	TG	NM_003235	Body		TRUE
cg13657981	0.599653	0.808421	0.208768	cg13657981	37	7	134558080	7	134208620	CALD1;CALD1;CALD1	NM_033157;NM_033138;NM_004342	Body;Body;Body		TRUE
cg20760676	0.65514	0.864151	0.209011	cg20760676	37	3	99776071	3	101258761	C3orf26;FILIP1L;FILIP1L	NM_032359;NM_182909;NM_001042459	Body;5'UTR;5'UTR		TRUE
cg02400611	0.675299	0.884376	0.209077	cg02400611	37	3	194783274	3	196264563				N_Shelf	TRUE
cg10944379	0.767333	0.976417	0.209084	cg10944379	37	10	35744528	10	35784534	CCNY;CCNY	NM_145012;NM_181698	Body;5'UTR		TRUE
cg15444478	0.535608	0.744858	0.20925	cg15444478	37	12	130494697	12	129060650
cg24426733	0.605861	0.815176	0.209315	cg24426733	37	1	33938904	1	33711491	ZSCAN20	NM_145238	5'UTR	S_Shore
cg22017733	0.385879	0.59523	0.209351	cg22017733	37	5	162936453	5	162869031	MAT2B;MAT2B	NM_013283;NM_182796	Body;Body	S_Shelf
cg05898452	0.491397	0.700857	0.20946	cg05898452	37	7	55224863	7	55192357	EGFR;EGFR;EGFR	NM_201284;NM_201282;NM_005228	Body;Body;Body		TRUE
cg08701843	0.553147	0.762799	0.209652	cg08701843	37	16	84328855	16	82886356	WFDC1	NM_021197	Body	S_Shore	TRUE
cg16540586	0.525041	0.734898	0.209857	cg16540586	37	16	85242550	16	83800051				Island		Unclassified_Cell_type_specific
cg00449812	0.527248	0.737179	0.209931	cg00449812	37	16	3137690	16	3077691				N_Shore	TRUE	Unclassified
cg11525409	0.330399	0.540333	0.209934	cg11525409	37	2	74236068	2	74089576					TRUE
cg22016870	0.31896	0.529028	0.210068	cg22016870	37	2	237980832	2	237645571						Unclassified
cg05999324	0.655825	0.866048	0.210223	cg05999324	37	10	112655570	10	112645560	PDCD4;PDCD4	NM_145341;NM_014456	Body;Body			Gene_Associated_Cell_type_specific
cg03306010	0.690491	0.900719	0.210228	cg03306010	37	15	53750302	15	51537594					TRUE
cg24740632	0.639495	0.849792	0.210297	cg24740632	37	5	134486678	5	134514577					TRUE
cg07711566	0.675093	0.885424	0.210331	cg07711566	37	6	30178514	6	30286493	TRIM26	NM_003449	5'UTR	N_Shelf
cg06071476	0.211248	0.421704	0.210456	cg06071476	37	16	22822339	16	22729840				N_Shelf
cg07452499	0.509298	0.719871	0.210573	cg07452499	37	X	49772484	X	49659224	CLCN5;MIR362;CLCN5;MIR500	NM_001127898;NR_029850;NM_001127899;NR_030224	Body;TSS1500;Body;TSS1500			Unclassified_Cell_type_specific
cg20491579	0.409588	0.620337	0.210749	cg20491579	37	12	130499189	12	129065142
cg16540262	0.509537	0.720466	0.210929	cg16540262	37	15	72883661	15	70670715					TRUE
cg08141553	0.577026	0.788013	0.210986	cg08141553	37	1	230201582	1	228268205	GALNT2	NM_004481	TSS1500	N_Shore
cg14541915	0.275353	0.486579	0.211227	cg14541915	37	11	65894463	11	65651039	PACS1	NM_018026	Body		TRUE	Unclassified
cg25994871	0.313241	0.524755	0.211514	cg25994871	37	7	107967614	7	107754850	NRCAM;NRCAM	NM_001037132;NM_005010	5'UTR;5'UTR		TRUE
cg19003390	0.635318	0.847087	0.21177	cg19003390	37	10	133948441	10	133798431	JAKMIP3	NM_001105521	Body	Island
cg15628586	0.692462	0.904511	0.212049	cg15628586	37	4	176068206	4	176304781
cg20300776	0.351021	0.563279	0.212258	cg20300776	37	1	88433987	1	88206575					TRUE
cg19055323	0.524254	0.736813	0.212559	cg19055323	37	17	39341434	17	36594960	KRTAP4-1	NM_033060	TSS1500
cg12583184	0.524052	0.736749	0.212697	cg12583184	37	12	113773298	12	112257681	SLC24A6	NM_024959	TSS1500	S_Shore		Promoter_Associated
cg01101782	0.585106	0.79784	0.212734	cg01101782	37	1	202778711	1	201045334	KDM5B	NM_006618	TSS1500	N_Shore
cg12260990	0.665897	0.878758	0.212861	cg12260990	37	22	47371122	22	45749786	TBC1D22A	NM_014346	Body	S_Shore
cg08892386	0.586928	0.799847	0.212919	cg08892386	37	1	212004804	1	210071427	LPGAT1	NM_014873	TSS1500	S_Shore		Promoter_Associated
cg24943627	0.488567	0.701541	0.212975	cg24943627	37	18	35147826	18	33401824				S_Shore
cg15902329	0.343961	0.55697	0.213009	cg15902329	37	11	18956196	11	18912772	MRGPRX1	NM_147199	1stExon
cg17026799	0.701929	0.914989	0.21306	cg17026799	37	4	139976840	4	140196290					TRUE
cg07318204	0.546015	0.759305	0.21329	cg07318204	37	4	145566441	4	145785891	HHIP	NM_022475	TSS1500	Island
cg09339818	0.397687	0.611138	0.213451	cg09339818	37	6	100914480	6	101021201				N_Shore	TRUE
cg00281273	0.540571	0.754088	0.213517	cg00281273	37	5	1514511	5	1567511	LPCAT1	NM_024830	Body
cg11762031	0.438519	0.652065	0.213546	cg11762031	37	14	105864488	14	104935533				Island		Promoter_Associated
cg13561476	0.417134	0.630725	0.213591	cg13561476	37	12	132093798	12	130659751						Unclassified
cg07768843	0.520062	0.733892	0.21383	cg07768843	37	X	13955102	X	13865023	GPM6B	NM_001001994	Body	N_Shore
cg06837799	0.443491	0.657643	0.214152	cg06837799	37	7	27160960	7	27127485	HOXA3	NM_153631	5'UTR	N_Shore
cg16217510	0.631034	0.845228	0.214194	cg16217510	37	5	1836793	5	1889793
cg27270412	0.46421	0.678472	0.214262	cg27270412	37	10	33622332	10	33662338	NRP1;NRP1;NRP1	NM_001024628;NM_003873;NM_001024629	Body;Body;Body	N_Shore		Unclassified_Cell_type_specific
cg22424284	0.645796	0.860254	0.214458	cg22424284	37	1	118166402	1	117967925	FAM46C	NM_017709	Body
cg08196601	0.478373	0.69296	0.214587	cg08196601	37	8	12869553	8	12913924	C8orf79;C8orf79	NM_020844;NM_001099677	Body;TSS1500
cg26017915	0.497633	0.712362	0.214729	cg26017915	37	1	161496726	1	159763350				S_Shore
cg00521934	0.227981	0.442784	0.214803	cg00521934	37	2	28114044	2	27967548	BRE;RBKS;BRE;BRE;BRE;BRE;LOC100302650	NM_199193;NM_022128;NM_199192;NM_199194;NM_199191;NM_004899;NR_028308	5'UTR;TSS1500;5'UTR;5'UTR;5'UTR;5'UTR;TSS200	S_Shore		Unclassified
cg23900293	0.297414	0.512221	0.214807	cg23900293	37	11	115924505	11	115429715					TRUE
cg07971289	0.657455	0.872266	0.214811	cg07971289	37	14	61410604	14	60480357	MNAT1	NM_002431	Body		TRUE
cg03362549	0.626601	0.841575	0.214974	cg03362549	37	8	96694077	8	96763253					TRUE
cg05738240	0.52191	0.736899	0.214989	cg05738240	37	12	114337927	12	112822310	RBM19;RBM19;RBM19	NM_001146698;NM_001146699;NM_016196	Body;Body;Body
cg13323615	0.221512	0.436782	0.21527	cg13323615	37	19	40948566	19	45640406	SERTAD3;SERTAD3	NM_203344;NM_013368	5'UTR;TSS200	N_Shore
cg15561501	0.606289	0.821705	0.215417	cg15561501	37	19	30160603	19	34852443	PLEKHF1	NM_024310	5'UTR	S_Shelf		Promoter_Associated
cg25134328	0.534345	0.749821	0.215476	cg25134328	37	7	47783668	7	47750193
cg20659064	0.257161	0.472654	0.215493	cg20659064	37	19	51524828	19	56216640	KLK10	NM_001077500	TSS1500	S_Shelf
cg07832178	0.678893	0.89454	0.215647	cg07832178	37	7	50198848	7	50169394	C7orf72	NM_001161834	3'UTR	Island
cg19100772	0.584416	0.800125	0.215709	cg19100772	37	6	72926485	6	72983206	RIMS1;RIMS1;RIMS1;RIMS1;RIMS1;RIMS1	NM_001168409;NM_001168410;NM_001168410;NM_001168407;NM_014989;NM_001168408	5'UTR;5'UTR;1stExon;Body;Body;Body
cg02899870	0.397451	0.613194	0.215743	cg02899870	37	20	32263104	20	31726765	NECAB3;NECAB3	NM_031231;NM_031232	TSS1500;TSS1500	N_Shore
cg20934765	0.401357	0.617213	0.215856	cg20934765	37	4	93366860	4	93585883	GRID2	NM_001510	Body		TRUE
cg00349061	0.291434	0.507414	0.215979	cg00349061	37	1	26371865	1	26244452	SLC30A2;SLC30A2	NM_032513;NM_001004434	Body;Body	N_Shore	TRUE	Unclassified_Cell_type_specific
cg17170504	0.571472	0.787454	0.215982	cg17170504	37	16	58283121	16	56840622	CCDC113;CCDC113	NM_014157;NM_001142302	TSS1500;TSS1500	N_Shore
cg13655169	0.219224	0.435289	0.216065	cg13655169	37	14	73929570	14	72999323					TRUE
cg10790181	0.673854	0.889959	0.216106	cg10790181	37	10	2776004	10	2766004
cg07195926	0.48759	0.703764	0.216175	cg07195926	37	3	128203414	3	129686104	GATA2;GATA2;GATA2	NM_001145661;NM_032638;NM_001145662	Body;Body;Body	N_Shelf	TRUE
cg00007675	0.266248	0.482577	0.216329	cg00007675	37	8	37606579	8	37725737	LOC728024;ERLIN2	NR_003671;NM_007175	TSS1500;Body
cg27336068	0.36891	0.585379	0.216469	cg27336068	37	10	1336103	10	1326103	ADARB2	NM_018702	Body		TRUE
cg00907505	0.403902	0.620384	0.216482	cg00907505	37	17	77715338	17	75329933	ENPP7	NM_178543	3'UTR	N_Shore	TRUE	Unclassified
cg07136023	0.586063	0.802852	0.216788	cg07136023	37	16	86537316	16	85094817				N_Shore
cg15771092	0.259892	0.476712	0.21682	cg15771092	37	22	44321586	22	42652919	PNPLA3	NM_025225	Body	S_Shore
cg18100127	0.481572	0.698413	0.21684	cg18100127	37	7	130125764	7	129913000	MEST	NM_177524	TSS1500	N_Shore		Promoter_Associated
cg18795133	0.530533	0.747382	0.216849	cg18795133	37	5	141130629	5	141110813				N_Shelf
cg10127554	0.646811	0.863703	0.216892	cg10127554	37	7	705435	7	671961	PRKAR1B;PRKAR1B;PRKAR1B;PRKAR1B;PRKAR1B;PRKAR1B	NM_001164759;NM_001164762;NM_001164758;NM_001164760;NM_001164761;NM_002735	Body;Body;Body;Body;Body;Body		TRUE
cg22202264	0.624167	0.841111	0.216944	cg22202264	37	11	133816022	11	133321232	IGSF9B	NM_014987	Body
cg26252794	0.493908	0.710965	0.217056	cg26252794	37	14	88097221	14	87166974					TRUE
cg20495365	0.465747	0.682805	0.217058	cg20495365	37	4	3371291	4	3341089	RGS12;RGS12;RGS12	NM_198227;NM_198229;NM_002926	TSS1500;Body;Body	N_Shelf	TRUE	Promoter_Associated
cg07508609	0.474056	0.691165	0.217109	cg07508609	37	16	10838389	16	10745890	NUBP1	NM_002484	Body	S_Shore		Promoter_Associated
cg15169189	0.196812	0.413968	0.217155	cg15169189	37	18	7568891	18	7558891	PTPRM;PTPRM	NM_002845;NM_001105244	Body;Body	S_Shore
cg04685531	0.772309	0.989513	0.217204	cg04685531	37	21	18988294	21	17910165				S_Shelf
cg07535191	0.447346	0.664702	0.217355	cg07535191	37	11	27250166	11	27206742					TRUE
cg06482188	0.611464	0.828912	0.217449	cg06482188	37	17	77644545	17	75259140					TRUE
cg25058023	0.628002	0.84552	0.217518	cg25058023	37	7	154863176	7	154494109	HTR5A	NM_024012	1stExon	Island
cg07065453	0.55883	0.776478	0.217648	cg07065453	37	8	143162526	8	143160433
cg01396065	0.445751	0.663505	0.217754	cg01396065	37	3	193789440	3	195272134				S_Shore	TRUE	Unclassified
cg19403029	0.599301	0.817143	0.217841	cg19403029	37	8	10587055	8	10624465	SOX7	NM_031439	Body	N_Shore
cg19591908	0.558526	0.776456	0.217929	cg19591908	37	14	101459254	14	100529007	SNORD114-31	NR_003224	TSS1500
cg20513447	0.64506	0.863008	0.217948	cg20513447	37	2	107459661	2	106826093	ST6GAL2;ST6GAL2;ST6GAL2	NM_032528;NM_001142352;NM_001142351	Body;Body;Body	Island
cg03675307	0.719033	0.93705	0.218017	cg03675307	37	10	27549166	10	27589172				S_Shore
cg19576798	0.573224	0.791299	0.218074	cg19576798	37	12	116893334	12	115377717					TRUE
cg18334799	0.515289	0.733658	0.218369	cg18334799	37	8	28165791	8	28221710					TRUE
cg27030141	0.455549	0.674227	0.218678	cg27030141	37	10	123688359	10	123678349	ATE1;ATE1	NM_007041;NM_001001976	TSS1500;TSS1500	S_Shore
cg13060236	0.327077	0.54579	0.218713	cg13060236	37	1	57490967	1	57263555	DAB1	NM_021080	Body		TRUE
cg17890667	0.710594	0.929445	0.218851	cg17890667	37	7	77469425	7	77307361	PHTF2;PHTF2;PHTF2;PHTF2;PHTF2	NM_001127360;NM_001127358;NM_001127357;NM_020432;NM_001127359	5'UTR;5'UTR;TSS200;TSS200;TSS200
cg08710911	0.621345	0.840354	0.219008	cg08710911	37	22	37574795	22	35904741				N_Shelf	TRUE
cg02952816	0.284287	0.503339	0.219052	cg02952816	37	17	80372912	17	77966201	C17orf101;C17orf101	NM_175902;NM_024648	Body;Body	N_Shore		Gene_Associated
cg19995856	0.624506	0.843658	0.219152	cg19995856	37	14	91574593	14	90644346					TRUE
cg17454509	0.649471	0.868647	0.219176	cg17454509	37	12	46308820	12	44595087					TRUE
cg03669147	0.563846	0.783128	0.219281	cg03669147	37	8	16857578	8	16901949	FGF20	NM_019851	Body	N_Shore
cg19761245	0.689678	0.909091	0.219413	cg19761245	37	4	41366989	4	41061746	LIMCH1;LIMCH1;LIMCH1	NM_014988;NM_001112718;NM_001112717	Body;Body;Body	S_Shelf	TRUE
cg24761863	0.391396	0.610982	0.219585	cg24761863	37	X	129190003	X	129017684	BCORL1	NM_021946	Body		TRUE
cg22351904	0.485741	0.705337	0.219595	cg22351904	37	1	234748373	1	232814996				S_Shore	TRUE	Promoter_Associated
cg13450549	0.174182	0.393869	0.219687	cg13450549	37	9	125227559	9	124267380					TRUE	Unclassified
cg17881007	0.322097	0.542005	0.219908	cg17881007	37	7	151106022	7	150736955	WDR86	NM_198285	Body	N_Shore		Unclassified_Cell_type_specific
cg00561194	0.673069	0.893414	0.220345	cg00561194	37	10	38069720	10	38109726				Island
cg17398851	0.0924171	0.312872	0.220455	cg17398851	37	19	47777507	19	52469347	PRR24	NM_178511	TSS1500	Island		Promoter_Associated
cg04747619	0.195929	0.416395	0.220466	cg04747619	37	8	6914838	8	6902248	DEFA5	NM_021010	TSS1500
cg02758706	0.549717	0.770304	0.220586	cg02758706	37	17	43445247	17	40801030				N_Shelf
cg06620397	0.657855	0.878678	0.220823	cg06620397	37	5	149602615	5	149582808	CAMK2A;CAMK2A	NM_015981;NM_171825	Body;Body
cg10096035	0.408717	0.629572	0.220855	cg10096035	37	12	96392698	12	94916829				S_Shelf	TRUE	Unclassified
cg23533270	0.576054	0.796911	0.220857	cg23533270	37	10	78635553	10	78305559	KCNMA1	NM_001014797	3'UTR
cg12052658	0.471969	0.692943	0.220975	cg12052658	37	17	14212064	17	14152789	HS3ST3B1	NM_006041	Body	N_Shore		Promoter_Associated_Cell_type_specific
cg19757573	0.451115	0.67215	0.221035	cg19757573	37	14	101506246	14	100575999	MIR654;MIR376B;MIR376A2;MIR300;MIR376A1	NR_030390;NR_030157;NR_030266;NR_030582;NR_029868	TSS1500;TSS1500;TSS200;TSS1500;TSS1500
cg00019997	0.595251	0.816339	0.221088	cg00019997	37	7	108025567	7	107812803	NRCAM;NRCAM	NM_001037132;NM_005010	5'UTR;5'UTR		TRUE	Unclassified_Cell_type_specific
cg24642933	0.49413	0.715399	0.221269	cg24642933	37	11	62903717	11	62660293	SLC22A24	NM_001136506	Body
cg12456573	0.345277	0.566619	0.221343	cg12456573	37	Y	6134650	Y	6194650				Island
cg23144445	0.429521	0.650953	0.221432	cg23144445	37	8	57471162	8	57633716					TRUE
cg25478600	0.664008	0.885827	0.221818	cg25478600	37	11	2890605	11	2847181	KCNQ1DN	NR_024627	TSS1500	Island
cg20644626	0.470259	0.692189	0.22193	cg20644626	37	4	74274353	4	74493217	ALB	NM_000477	Body		TRUE
cg15166900	0.622791	0.844732	0.221941	cg15166900	37	3	69132709	3	69215399	ARL6IP5	NM_006407	TSS1500	N_Shore
cg04309299	0.149388	0.371357	0.221969	cg04309299	37	11	59383888	11	59140464	OSBP	NM_002556	TSS1500	S_Shore		Promoter_Associated
cg14625770	0.390265	0.612245	0.221979	cg14625770	37	9	104295276	9	103335097	RNF20	NM_019592	TSS1500	N_Shore
cg03889263	0.395064	0.61718	0.222116	cg03889263	37	3	177002388	3	178485082					TRUE	Unclassified_Cell_type_specific
cg07132326	0.328475	0.550921	0.222446	cg07132326	37	6	150258058	6	150299751				N_Shore
cg12127991	0.334214	0.556664	0.22245	cg12127991	37	1	228870637	1	226937260	RHOU	NM_021205	TSS1500	N_Shore
cg02296478	0.280298	0.502852	0.222553	cg02296478	37	4	114213574	4	114433023	ANK2;ANK2;ANK2	NM_001148;NM_001127493;NM_020977	Body;Body;Body		TRUE
cg10592592	0.424993	0.647655	0.222662	cg10592592	37	10	74034663	10	73704669	DDIT4	NM_019058	Body	Island		Promoter_Associated
cg08934228	0.148936	0.371619	0.222683	cg08934228	37	10	14541266	10	14581272						Unclassified
cg09218327	0.265045	0.487785	0.22274	cg09218327	37	7	72935051	7	72572987	BAZ1B	NM_032408	Body	N_Shore		Promoter_Associated_Cell_type_specific
cg05901522	0.410026	0.632804	0.222778	cg05901522	37	10	82169480	10	82159460	C10orf58	NM_032333	5'UTR	S_Shore
cg20311673	0.651503	0.874551	0.223048	cg20311673	37	2	1746207	2	1725214	PXDN	NM_012293	Body	N_Shore
cg19540425	0.504304	0.727416	0.223112	cg19540425	37	12	32655836	12	32547103	FGD4	NM_139241	5'UTR		TRUE
cg01710670	0.448654	0.671782	0.223128	cg01710670	37	16	15018856	16	14926357				Island
cg05728596	0.674714	0.897911	0.223197	cg05728596	37	2	219128475	2	218836719	GPBAR1;GPBAR1;GPBAR1	NM_001077194;NM_170699;NM_001077191	3'UTR;3'UTR;3'UTR
cg08104960	0.582432	0.805836	0.223404	cg08104960	37	17	807555	17	754305	NXN	NM_022463	Body
cg26116669	0.469993	0.693407	0.223415	cg26116669	37	2	88654640	2	88435755				S_Shelf
cg07657332	0.445432	0.668852	0.22342	cg07657332	37	10	54643873	10	54313879
cg12393108	0.676653	0.900281	0.223628	cg12393108	37	11	124064793	11	123570003					TRUE
cg03166286	0.113247	0.336918	0.223671	cg03166286	37	9	88555512	9	87745332	NAA35	NM_024635	TSS1500	N_Shore
ch.2.1701371R	0.427914	0.651779	0.223865	ch.2.1701371R	36	2	75108364	2	74961871	HK2	NM_000189	Body
cg01505275	0.167717	0.392243	0.224527	cg01505275	37	11	4628823	11	4585399	TRIM68	NM_018073	5'UTR	N_Shore		Promoter_Associated
cg00738869	0.368961	0.593636	0.224675	cg00738869	37	3	138552648	3	140035338				N_Shore
cg26617333	0.45298	0.67799	0.22501	cg26617333	37	X	14743108	X	14653029	GLRA2;GLRA2;GLRA2	NM_001118886;NM_001118885;NM_002063	Body;Body;Body			Unclassified_Cell_type_specific
cg21385821	0.31173	0.536742	0.225012	cg21385821	37	17	50237844	17	47592843	CA10;CA10	NM_001082533;NM_001082534	TSS1500;TSS1500	S_Shore
cg11385961	0.583703	0.80875	0.225047	cg11385961	37	15	35461860	15	33249152					TRUE
cg02005782	0.613139	0.838263	0.225125	cg02005782	37	7	105857664	7	105644900					TRUE
cg04645444	0.224734	0.44994	0.225206	cg04645444	37	15	32267545	15	30054837					TRUE	Unclassified
cg20812370	0.503903	0.729145	0.225243	cg20812370	37	1	164581169	1	162847793	PBX1	NM_002585	Body		TRUE
cg20928238	0.207632	0.433137	0.225506	cg20928238	37	14	71284925	14	70354678				N_Shelf		Unclassified
cg03559073	0.307242	0.532808	0.225566	cg03559073	37	12	114833303	12	113317686	TBX5;TBX5;TBX5;TBX5	NM_000192;NM_181486;NM_080717;NM_080718	Body;Body;Body;Body	N_Shore
cg02524954	0.523902	0.749484	0.225581	cg02524954	37	11	32454964	11	32411540	WT1;WT1;WT1;WT1	NM_024425;NM_024426;NM_000378;NM_024424	Body;Body;Body;Body	Island
cg04938780	0.479044	0.704698	0.225654	cg04938780	37	2	130960303	2	130676773
cg13244211	0.580995	0.806857	0.225862	cg13244211	37	10	120820080	10	120810070	SNORA19;EIF3A	NR_002917;NM_003750	TSS1500;Body
cg15336243	0.483228	0.709437	0.226209	cg15336243	37	10	15386981	10	15426987	FAM171A1	NM_001010924	Body
cg00829645	0.614538	0.840798	0.22626	cg00829645	37	1	49364657	1	49137244	AGBL4	NM_032785	Body	Island
cg12167823	0.507517	0.733818	0.2263	cg12167823	37	4	185571549	4	185808543	CASP3;CCDC111;CASP3	NM_004346;NM_152683;NM_032991	TSS1500;5'UTR;TSS1500	S_Shore
cg14591667	0.296651	0.523405	0.226755	cg14591667	37	17	47210822	17	44565821	B4GALNT2;B4GALNT2;B4GALNT2	NM_001159387;NM_153446;NM_001159388	Body;Body;5'UTR	S_Shore	TRUE
cg24923430	0.300986	0.527778	0.226792	cg24923430	37	8	8679450	8	8716860	MFHAS1	NM_004225	Body		TRUE
cg17658341	0.339319	0.56612	0.2268	cg17658341	37	11	14043404	11	13999980	SPON1	NM_006108	Body		TRUE
cg18635552	0.523451	0.750286	0.226835	cg18635552	37	5	3599719	5	3652719	IRX1	NM_024337	Body	Island
cg21946967	0.369767	0.596644	0.226877	cg21946967	37	15	82340505	15	80127560				S_Shore
cg18937875	0.33214	0.559211	0.22707	cg18937875	37	11	14930189	11	14886765				S_Shelf		Unclassified
cg09880331	0.60362	0.830786	0.227166	cg09880331	37	5	95902142	5	95927898					TRUE
cg24152511	0.392068	0.619238	0.22717	cg24152511	37	1	208508894	1	206575517					TRUE
cg07790085	0.733794	0.960964	0.22717	cg07790085	37	13	29597447	13	28495447	MTUS2	NM_001033602	TSS1500
cg25431463	0.48418	0.711581	0.227401	cg25431463	37	20	36012946	20	35446360	SRC;SRC	NM_198291;NM_005417	Body;Body	Island		Promoter_Associated
cg25139843	0.181159	0.408591	0.227432	cg25139843	37	11	26353094	11	26309670	ANO3	NM_031418	TSS1500	N_Shore	TRUE
cg15350780	0.430736	0.658228	0.227492	cg15350780	37	18	9105577	18	9095577	NDUFV2	NM_021074	Body	S_Shelf	TRUE
cg21202759	0.527689	0.755236	0.227547	cg21202759	37	2	241085043	2	240733716						Unclassified_Cell_type_specific
cg10416814	0.663519	0.891156	0.227638	cg10416814	37	13	23422850	13	22320850				Island
cg05646491	0.531525	0.759293	0.227768	cg05646491	37	10	135379754	10	135229744	SYCE1;SYCE1;SYCE1	NM_001143763;NM_130784;NM_001143764	TSS1500;5'UTR;TSS1500	Island
cg24198004	0.266192	0.494163	0.227971	cg24198004	37	3	99364061	3	100846751	COL8A1;MIR548G;COL8A1	NM_001850;NR_031662;NM_020351	5'UTR;Body;5'UTR		TRUE
cg27050987	0.165007	0.392982	0.227975	cg27050987	37	10	97516407	10	97506397	ENTPD1;ENTPD1;ENTPD1;ENTPD1;ENTPD1;ENTPD1;ENTPD1	NM_001164179;NM_001164178;NM_001776;NM_001164183;NM_001164182;NM_001164181;NM_001098175	Body;Body;Body;5'UTR;5'UTR;5'UTR;Body		TRUE	Unclassified_Cell_type_specific
cg01748414	0.611029	0.839778	0.228749	cg01748414	37	6	2698014	6	2643013	MYLK4	NM_001012418	Body
cg16579136	0.374269	0.60368	0.229411	cg16579136	37	3	137677134	3	139159824					TRUE
cg03667544	0.49109	0.720603	0.229512	cg03667544	37	10	135049598	10	134899588				Island	TRUE
cg18443437	0.521655	0.751282	0.229627	cg18443437	37	5	3326731	5	3379731				S_Shore	TRUE
cg26326560	0.480892	0.710553	0.229661	cg26326560	37	8	13349394	8	13393765	DLC1;DLC1	NM_182643;NM_024767	Body;Body		TRUE
cg19579903	0.285475	0.515852	0.230377	cg19579903	37	6	30583082	6	30691061	PPP1R10	NM_002714	5'UTR	N_Shore		Promoter_Associated
cg13054358	0.369411	0.599825	0.230414	cg13054358	37	11	10339086	11	10295662					TRUE
cg05509659	0.56236	0.792836	0.230475	cg05509659	37	11	124738871	11	124244081	ROBO3	NM_022370	Body	Island		Unclassified
cg03897712	0.520791	0.75132	0.230529	cg03897712	37	7	73442370	7	73080306	ELN;ELN;ELN;ELN;ELN	NM_001081753;NM_001081752;NM_001081754;NM_000501;NM_001081755	TSS200;TSS200;TSS200;TSS200;TSS200
cg13560853	0.482872	0.713483	0.230611	cg13560853	37	12	78710064	12	77234195					TRUE
cg22249612	0.41129	0.64194	0.23065	cg22249612	37	12	56121485	12	54407752	CD63;CD63	NM_001040034;NM_001780	Body;Body	N_Shore
cg15740507	0.469227	0.699944	0.230718	cg15740507	37	3	99988576	3	101471266	TBC1D23	NM_018309	Body		TRUE
cg06440065	0.407786	0.63901	0.231224	cg06440065	37	19	30206617	19	34898457	C19orf12;C19orf12	NM_031448;NM_001031726	TSS200;TSS1500	S_Shore		Promoter_Associated
cg22712983	0.52982	0.761187	0.231367	cg22712983	37	2	219187374	2	218895618	PNKD;PNKD	NM_022572;NM_015488	TSS1500;Body	N_Shore		Promoter_Associated
cg18094824	0.449743	0.68142	0.231677	cg18094824	37	4	104119899	4	104339348	CENPE	NM_001813	TSS1500	S_Shore		Promoter_Associated
cg15576730	0.368314	0.600035	0.231722	cg15576730	37	19	55693151	19	60384963	SYT5;PTPRH;PTPRH	NM_003180;NM_002842;NM_001161440	TSS1500;Body;Body	S_Shore
cg20279327	0.205193	0.437014	0.231821	cg20279327	37	13	107222835	13	106020836				S_Shelf
cg09267458	0.605281	0.837254	0.231972	cg09267458	37	8	47015425	8	47134590
cg04784471	0.202914	0.434937	0.232023	cg04784471	37	16	2765637	16	2705638	PRSS27	NM_031948	Body	Island		Unclassified_Cell_type_specific
cg16202338	0.259896	0.492183	0.232287	cg16202338	37	3	164050953	3	165533647					TRUE
cg24713204	0.136191	0.368621	0.23243	cg24713204	37	19	57019373	19	61711185	ZNF471	NM_020813	5'UTR	Island		Unclassified_Cell_type_specific
cg01572434	0.377384	0.609931	0.232547	cg01572434	37	5	130219926	5	130247825					TRUE
cg14586258	0.325843	0.558559	0.232716	cg14586258	37	2	66823365	2	66676869					TRUE
cg23057870	0.28169	0.514458	0.232768	cg23057870	37	8	80679111	8	80841666	HEY1;HEY1	NM_001040708;NM_012258	Body;Body	N_Shore
cg16553051	0.483288	0.716117	0.23283	cg16553051	37	20	35806496	20	35239910	RPN2;C20orf132;RPN2;C20orf132;C20orf132	NM_002951;NM_213632;NM_001135771;NM_213631;NM_152503	TSS1500;Body;TSS1500;Body;Body	N_Shore		Promoter_Associated
cg09252315	0.183255	0.416204	0.232948	cg09252315	37	15	63414802	15	61201855	LACTB;LACTB	NM_171846;NM_032857	Body;Body	Island		Unclassified
cg15225701	0.139513	0.372721	0.233208	cg15225701	37	5	108083455	5	108111354	FER	NM_005246	TSS200	N_Shore		Promoter_Associated
cg25536787	0.371728	0.605016	0.233288	cg25536787	37	17	26221167	17	23245294	C17orf108	NM_001076680	TSS1500	S_Shore	TRUE	Promoter_Associated
cg26011615	0.37415	0.607455	0.233305	cg26011615	37	1	212839307	1	210905930					TRUE	Unclassified
cg25902939	0.1974	0.431051	0.233651	cg25902939	37	19	18544350	19	18405350	SSBP4;SSBP4	NM_032627;NM_001009998	Body;Body	Island		Unclassified_Cell_type_specific
cg13941436	0.524121	0.758068	0.233947	cg13941436	37	9	138437177	9	137576998	OBP2A	NM_014582	TSS1500
cg09552166	0.135386	0.369482	0.234096	cg09552166	37	3	135913383	3	137396073	MSL2;MSL2	NM_001145417;NM_018133	TSS200;Body	N_Shore
ch.1.659111R	0.447805	0.68197	0.234165	ch.1.659111R	36	1	19511116	1	19383702	UBR4	NM_020765	Body
cg00676360	0.647949	0.882216	0.234267	cg00676360	37	6	49917175	6	50025134	DEFB133	NM_001166478	TSS200
cg12619400	0.645202	0.879549	0.234347	cg12619400	37	7	156332539	7	156025300	C7orf4	NR_024119	TSS1500
cg26389316	0.558625	0.793328	0.234703	cg26389316	37	3	9273803	3	9248803	SRGAP3;SRGAP3	NM_001033117;NM_014850	Body;Body		TRUE
cg25289899	0.425979	0.660693	0.234714	cg25289899	37	11	2019167	11	1975743	H19;MIR675	NR_002196;NR_030533	TSS200;TSS1500	N_Shore
cg13727849	0.467104	0.702154	0.235049	cg13727849	37	17	72210343	17	69721938	MGC16275;TTYH2	NR_026914;NM_032646	TSS1500;Body	S_Shore
cg17139436	0.346142	0.581323	0.235181	cg17139436	37	11	1715762	11	1672338	HCCA2	NM_053005	Body	Island		Unclassified_Cell_type_specific
cg18205205	0.599482	0.834772	0.235289	cg18205205	37	14	23884368	14	22954208	MYH7	NM_000257	Body
cg22115706	0.352159	0.587554	0.235395	cg22115706	37	7	130125719	7	129912955	MEST	NM_177524	TSS1500	N_Shore
cg25067849	0.0984491	0.333894	0.235445	cg25067849	37	18	48346660	18	46600658	MRO;MRO;MRO;MRO	NM_001127176;NM_031939;NM_001127174;NM_001127175	TSS1500;TSS1500;5'UTR;TSS1500			Unclassified
cg02854695	0.130366	0.365896	0.23553	cg02854695	37	19	50832032	19	55523844	KCNC3	NM_004977	1stExon	Island		Unclassified
cg23903723	0.22103	0.456583	0.235553	cg23903723	37	6	30655567	6	30763546	KIAA1949;KIAA1949;KIAA1949	NM_001134870;NM_133471;NM_133471	TSS1500;5'UTR;1stExon	S_Shore		Promoter_Associated
cg19474983	0.579082	0.814751	0.23567	cg19474983	37	3	97850378	3	99333068	OR5H1	NM_001005338	TSS1500
cg02816732	0.60116	0.836891	0.235731	cg02816732	37	7	47384337	7	47350862	TNS3	NM_022748	Body
cg03717442	0.351656	0.587407	0.235751	cg03717442	37	2	45172201	2	45025705	SIX3	NM_005413	3'UTR	S_Shore
cg08114533	0.274985	0.510894	0.235909	cg08114533	37	11	67168528	11	66925104	PPP1CA;PPP1CA;PPP1CA	NM_001008709;NM_206873;NM_002708	Body;Body;Body	N_Shore		Promoter_Associated
cg11406134	0.579683	0.816151	0.236468	cg11406134	37	1	19202951	1	19075538	ALDH4A1;ALDH4A1;ALDH4A1	NM_170726;NM_001161504;NM_003748	Body;Body;Body	N_Shore		Unclassified
cg23791325	0.423805	0.660471	0.236666	cg23791325	37	2	95743038	2	95106765				S_Shore		Unclassified
cg10410213	0.333803	0.570474	0.236671	cg10410213	37	6	53214258	6	53322217	ELOVL5	NM_021814	TSS1500	S_Shore
cg10579408	0.319433	0.556178	0.236745	cg10579408	37	7	86850525	7	86688461	C7orf23	NM_024315	TSS1500	S_Shore
cg16208084	0.390644	0.627829	0.237185	cg16208084	37	17	40274703	17	37528229	HSPB9;KAT2A	NM_033194;NM_021078	TSS200;TSS1500	Island		Unclassified_Cell_type_specific
cg08691422	0.235669	0.472868	0.237199	cg08691422	37	17	7588787	17	7529512	TP53;WRAP53;TP53;TP53;TP53	NM_000546;NM_001143990;NM_001126113;NM_001126112;NM_001126114	5'UTR;TSS1500;5'UTR;5'UTR;5'UTR	N_Shore
cg24934400	0.455357	0.693019	0.237662	cg24934400	37	4	4873966	4	4924867				Island	TRUE
cg18349937	0.739167	0.976839	0.237672	cg18349937	37	12	133394081	12	131904154	GOLGA3	NM_005895	Body
cg24867468	0.476197	0.714104	0.237907	cg24867468	37	17	76109222	17	73620817	TMC6;TMC6	NM_001127198;NM_007267	3'UTR;3'UTR			Gene_Associated
cg04732596	0.598191	0.836268	0.238076	cg04732596	37	2	66789740	2	66643244	MEIS1	NM_002398	Body		TRUE
cg05984948	0.36052	0.598996	0.238476	cg05984948	37	7	116057886	7	115845122					TRUE
cg27069921	0.329141	0.567704	0.238563	cg27069921	37	5	54523727	5	54559484				Island
cg27317046	0.31358	0.552156	0.238576	cg27317046	37	14	74968209	14	74037962	LTBP2	NM_000428	Body		TRUE
cg05575639	0.238364	0.477504	0.23914	cg05575639	37	8	61593696	8	61756250	CHD7	NM_017780	5'UTR	S_Shore
cg07249488	0.39786	0.637984	0.240125	cg07249488	37	12	133304604	12	131814677	ANKLE2	NM_015114	Body	S_Shore
cg20039257	0.406655	0.646895	0.24024	cg20039257	37	8	102799686	8	102868862	NCALD;NCALD;NCALD;NCALD;NCALD;NCALD;NCALD;NCALD	NM_001040629;NM_001040624;NM_001040626;NM_001040630;NM_001040628;NM_001040625;NM_001040627;NM_032041	5'UTR;5'UTR;5'UTR;5'UTR;5'UTR;5'UTR;5'UTR;5'UTR		TRUE
cg03227338	0.128911	0.369239	0.240328	cg03227338	37	11	46998965	11	46955541	C11orf49;C11orf49;C11orf49;C11orf49	NM_001003677;NM_024113;NM_001003676;NM_001003678	Body;Body;Body;Body		TRUE
cg22251148	0.56398	0.804636	0.240656	cg22251148	37	11	16631866	11	16588442				N_Shore
cg20541505	0.612194	0.853211	0.241017	cg20541505	37	2	28395518	2	28249022	BRE;BRE;BRE;BRE;BRE	NM_199192;NM_199193;NM_199191;NM_004899;NM_199194	Body;Body;Body;Body;Body		TRUE
cg07165811	0.272037	0.513318	0.241281	cg07165811	37	19	3360732	19	3311732	NFIC	NM_205843	Body	Island
cg05150667	0.54467	0.786011	0.24134	cg05150667	37	4	23994603	4	23603701					TRUE
cg14559212	0.245918	0.487603	0.241685	cg14559212	37	2	9983052	2	9900503	TAF1B	NM_005680	TSS1500	N_Shore		Promoter_Associated
cg03826688	0.494055	0.735777	0.241722	cg03826688	37	12	16756662	12	16647929	LMO3;LMO3	NM_018640;NM_001001395	5'UTR;5'UTR		TRUE
cg10770287	0.454445	0.696189	0.241744	cg10770287	37	14	96970127	14	96039880	PAPOLA	NM_032632	Body	S_Shore		Promoter_Associated
cg00708678	0.291763	0.533862	0.242099	cg00708678	37	10	91294839	10	91284819	SLC16A12	NM_213606	5'UTR	N_Shore	TRUE
cg22740796	0.61909	0.861726	0.242636	cg22740796	37	10	132461281	10	132351271
cg03173722	0.370343	0.613238	0.242895	cg03173722	37	4	71587640	4	71806504	RUFY3;RUFY3;RUFY3	NM_001130709;NM_001037442;NM_014961	Body;TSS200;TSS200		TRUE
cg19484645	0.525101	0.768318	0.243217	cg19484645	37	6	4995292	6	4940291	RPP40	NM_006638	3'UTR
cg01839993	0.570913	0.814672	0.243758	cg01839993	37	10	74034644	10	73704650	DDIT4	NM_019058	Body	Island		Promoter_Associated
cg21434530	0.425372	0.669281	0.243909	cg21434530	37	4	4870486	4	4921387				S_Shore
cg01518607	0.43404	0.677974	0.243934	cg01518607	37	6	27235891	6	27343870
cg15798563	0.551231	0.795419	0.244188	cg15798563	37	19	18436975	19	18297975				S_Shelf
cg26810336	0.16527	0.4095	0.24423	cg26810336	37	X	28605742	X	28515663	IL1RAPL1;IL1RAPL1	NM_014271;NM_014271	5'UTR;1stExon
cg20250269	0.473684	0.718145	0.244461	cg20250269	37	10	125751413	10	125741403				Island
cg15216812	0.642987	0.88792	0.244933	cg15216812	37	3	149697815	3	151180505				N_Shelf
cg08174792	0.540161	0.785229	0.245069	cg08174792	37	22	50221949	22	48607953				S_Shore		Promoter_Associated
cg05119988	0.431642	0.677087	0.245445	cg05119988	37	4	166251189	4	166470639	SC4MOL;SC4MOL	NM_001017369;NM_006745	5'UTR;5'UTR	S_Shelf
cg00676988	0.60284	0.849178	0.246338	cg00676988	37	4	186494912	4	186731906					TRUE
cg04381865	0.243083	0.489437	0.246354	cg04381865	37	16	15219673	16	15127174				N_Shore
cg08095377	0.546694	0.793191	0.246497	cg08095377	37	2	132511110	2	132227580	C2orf27A	NM_013310	Body
ch.8.2353618R	0.37666	0.623569	0.246909	ch.8.2353618R	36	8	119282796	8	119351976	SAMD12	NM_001101676	Body
cg15721145	0.241201	0.488168	0.246967	cg15721145	37	20	61867205	20	61337650	BIRC7;BIRC7	NM_022161;NM_139317	TSS200;TSS200	N_Shelf	TRUE	Unclassified
cg00594917	0.642413	0.889736	0.247324	cg00594917	37	1	203020566	1	201287189	PPFIA4;PPFIA4	NM_015053;NM_015053	5'UTR;1stExon
cg26768964	0.584358	0.831746	0.247388	cg26768964	37	7	124445705	7	124232941					TRUE
cg03954048	0.350773	0.599105	0.248332	cg03954048	37	2	98858571	2	98225003	VWA3B	NM_144992	Body
cg05713971	0.440526	0.68898	0.248454	cg05713971	37	16	56965542	16	55523043	HERPUD1;HERPUD1;HERPUD1	NM_001010990;NM_014685;NM_001010989	TSS1500;TSS1500;TSS1500	N_Shore		Promoter_Associated
cg03230133	0.508851	0.759597	0.250746	cg03230133	37	2	60812640	2	60666144				Island
cg15076318	0.54851	0.800066	0.251556	cg15076318	37	6	32847788	6	32955766	PPP1R2P1	NR_027771	Body	Island
cg00084798	0.584396	0.836001	0.251605	cg00084798	37	8	142841965	8	142839872				Island
cg07593177	0.424415	0.676391	0.251976	cg07593177	37	11	6501850	11	6458426	ARFIP2;FXC1	NM_012402;NM_012192	5'UTR;TSS1500	N_Shore
cg20360416	0.256458	0.508915	0.252458	cg20360416	37	4	7246127	4	7297028	SORCS2	NM_020777	Body
cg13802789	0.626242	0.879227	0.252986	cg13802789	37	9	130027116	9	129066937	GARNL3;GARNL3	NM_032293;NM_032293	1stExon;5'UTR		TRUE
cg16651537	0.491928	0.745115	0.253187	cg16651537	37	19	51226536	19	55918348	CLEC11A	NM_002975	TSS200	N_Shore	TRUE	Unclassified_Cell_type_specific
cg15374053	0.465389	0.719563	0.254175	cg15374053	37	18	31023568	18	29277566				S_Shelf
cg22619549	0.605012	0.859289	0.254277	cg22619549	37	10	102090297	10	102080287	PKD2L1	NM_016112	TSS200
cg26477549	0.290952	0.545271	0.254319	cg26477549	37	12	106642937	12	105167067	CKAP4	NM_006825	TSS1500	S_Shore		Promoter_Associated
cg20632453	0.505486	0.760146	0.25466	cg20632453	37	13	20771319	13	19669319				S_Shelf		Unclassified
cg23719393	0.697942	0.952954	0.255012	cg23719393	37	3	88202448	3	88285138	C3orf38	NM_173824	Body	S_Shelf
cg20156793	0.564943	0.820175	0.255232	cg20156793	37	12	89768575	12	88292706					TRUE
cg08401628	0.512755	0.768116	0.255361	cg08401628	37	16	85433676	16	83991177
cg13568415	0.405159	0.660808	0.255649	cg13568415	37	7	2564966	7	2531492	LFNG;LFNG;LFNG;LFNG	NM_001166355;NM_001040167;NM_001040168;NM_002304	Body;Body;Body;Body	N_Shore
cg23688111	0.364688	0.620949	0.256261	cg23688111	37	2	234825859	2	234490598	TRPM8	NM_024080	TSS200		TRUE
cg06215908	0.502065	0.758744	0.256679	cg06215908	37	22	44965381	22	43344045	NCRNA00207;NCRNA00207;NCRNA00207	NR_028410;NR_028409;NR_028411	Body;Body;Body
cg01563888	0.603198	0.860537	0.25734	cg01563888	37	6	49596253	6	49704212	RHAG	NM_000324	Body
cg05607742	0.512126	0.76947	0.257345	cg05607742	37	3	98674154	3	100156844					TRUE
cg06124876	0.367935	0.625708	0.257772	cg06124876	37	1	22721151	1	22593738					TRUE
cg27092191	0.43784	0.695652	0.257812	cg27092191	37	16	31884699	16	31792200	ZNF267	NM_003414	TSS1500	N_Shore		NonGene_Associated
cg05385567	0.30146	0.559467	0.258007	cg05385567	37	16	29936865	16	29844366	KCTD13	NM_178863	Body	N_Shore		Promoter_Associated
cg22156300	0.636754	0.895144	0.25839	cg22156300	37	3	175338899	3	176821593	NAALADL2	NM_207015	Body
cg19451732	0.455637	0.71493	0.259292	cg19451732	37	2	122562244	2	122278714					TRUE
cg03650946	0.277848	0.540082	0.262233	cg03650946	37	7	27154562	7	27121087	HOXA3;HOXA3;HOXA3	NM_153631;NM_153632;NM_030661	5'UTR;TSS1500;5'UTR	N_Shore
cg23489137	0.546867	0.809645	0.262778	cg23489137	37	2	161290449	2	160998695	RBMS1;RBMS1	NM_002897;NM_016836	Body;Body		TRUE
cg10986104	0.451682	0.71503	0.263348	cg10986104	37	13	99089870	13	97887871	FARP1	NM_005766	Body
cg24743423	0.12746	0.391219	0.263759	cg24743423	37	X	8701002	X	8661002	KAL1	NM_000216	TSS1500	S_Shore
cg14150252	0.286299	0.551671	0.265372	cg14150252	37	2	64069583	2	63923087	UGP2;UGP2	NM_006759;NM_001001521	Body;5'UTR	S_Shore
cg12305265	0.524127	0.790365	0.266238	cg12305265	37	6	162065571	6	161985561	PARK2;PARK2;PARK2	NM_004562;NM_013987;NM_013988	Body;Body;Body	N_Shore
cg12248480	0.527397	0.794299	0.266902	cg12248480	37	6	81283368	6	81340087
cg26102435	0.534771	0.801896	0.267125	cg26102435	37	14	99507062	14	98576815
cg17125837	0.620859	0.888554	0.267695	cg17125837	37	11	358595	11	348595				S_Shelf
cg01003599	0.152174	0.420021	0.267847	cg01003599	37	1	213123436	1	211190059	VASH2;VASH2;VASH2	NM_001136475;NM_024749;NM_001136474	TSS1500;TSS1500;TSS1500	N_Shore
cg12222949	0.316793	0.584894	0.268101	cg12222949	37	1	184005360	1	182271983	GLT25D2	NM_015101	Body	Island		Promoter_Associated_Cell_type_specific
cg17706086	0.320901	0.592593	0.271691	cg17706086	37	7	130129946	7	129917182	MESTIT1;MEST;MEST	NR_004382;NM_177524;NM_177525	Body;5'UTR;TSS1500	N_Shore	TRUE
cg11216456	0.614184	0.88589	0.271705	cg11216456	37	10	131355243	10	131245233	MGMT	NM_002412	Body
cg05323345	0.306994	0.57981	0.272816	cg05323345	37	11	2163174	11	2119750	IGF2AS;INS-IGF2;IGF2;IGF2;IGF2AS	NR_028044;NR_003512;NM_001007139;NM_001127598;NR_028043	Body;Body;5'UTR;TSS1500;Body	N_Shore
cg26147845	0.489922	0.763063	0.273141	cg26147845	37	12	132433838	12	130999791	EP400	NM_015409	TSS1500	N_Shore
cg16963144	0.56007	0.83324	0.27317	cg16963144	37	20	22566976	20	22514976	FOXA2	NM_153675	TSS1500	Island		Unclassified
cg21232671	0.496963	0.771065	0.274102	cg21232671	37	14	37059657	14	36129408					TRUE
cg09284949	0.238848	0.513201	0.274353	cg09284949	37	19	51190179	19	55881991	SHANK1	NM_016148	Body	S_Shore	TRUE
cg26288502	0.328805	0.604808	0.276003	cg26288502	37	8	10421582	8	10458992					TRUE
cg05920961	0.234578	0.51177	0.277192	cg05920961	37	14	102248253	14	101318006	PPP2R5C;PPP2R5C	NM_001161726;NM_001161725	Body;Body	Island		Unclassified
cg18571640	0.343216	0.622247	0.279031	cg18571640	37	8	33210211	8	33329753					TRUE
cg01514356	0.510047	0.790443	0.280396	cg01514356	37	8	142981853	8	142979760				N_Shelf
cg02321519	0.328478	0.609403	0.280925	cg02321519	37	10	29844493	10	29884499	SVIL;SVIL	NM_021738;NM_003174	5'UTR;5'UTR		TRUE
cg21850702	0.565015	0.848915	0.2839	cg21850702	37	4	744555	4	734555	PCGF3	NM_006315	Body	S_Shelf
cg04251368	0.510521	0.795	0.284479	cg04251368	37	11	2890587	11	2847163	KCNQ1DN	NR_024627	TSS1500	Island
cg01420254	0.446875	0.733253	0.286378	cg01420254	37	6	26195488	6	26303467				N_Shore
cg05699035	0.503466	0.792765	0.289298	cg05699035	37	1	215259771	1	213326394	KCNK2;KCNK2;KCNK2	NM_014217;NM_001017425;NM_001017424	Body;Body;Body	S_Shelf
cg27655706	0.422124	0.714653	0.292529	cg27655706	37	7	96044476	7	95882412					TRUE	Unclassified_Cell_type_specific
cg17985533	0.50744	0.801176	0.293736	cg17985533	37	11	2019116	11	1975692	H19;MIR675	NR_002196;NR_030533	TSS200;TSS1500	N_Shore
cg26923084	0.333671	0.62945	0.295778	cg26923084	37	14	52536893	14	51606643	NID2	NM_007361	TSS1500	S_Shore
cg20050237	0.332417	0.633296	0.300879	cg20050237	37	14	77391448	14	76461201					TRUE
cg15103584	0.307942	0.609185	0.301243	cg15103584	37	18	56943576	18	55094556				S_Shelf	TRUE
cg08511886	0.39338	0.694723	0.301343	cg08511886	37	16	60233305	16	58790806					TRUE
cg03982150	0.666667	0.970286	0.303619	cg03982150	37	7	753007	7	719533	PRKAR1B;PRKAR1B;PRKAR1B;PRKAR1B;PRKAR1B;PRKAR1B	NM_001164762;NM_001164760;NM_002735;NM_001164759;NM_001164758;NM_001164761	TSS1500;5'UTR;TSS1500;5'UTR;5'UTR;TSS200	S_Shore
cg22940655	0.664662	0.972028	0.307366	cg22940655	37	2	168275428	2	167983674					TRUE
cg07719898	0.648336	0.956346	0.30801	cg07719898	37	1	200274728	1	198541351				S_Shelf
cg04092437	0.525565	0.834755	0.30919	cg04092437	37	10	92971269	10	92961249					TRUE
cg00482898	0.0130916	0.323189	0.310098	cg00482898	37	2	70521446	2	70374950	SNRPG	NM_003096	TSS1500	S_Shore
cg09526135	0.580523	0.893801	0.313278	cg09526135	37	4	85603757	4	85822781	WDFY3;WDFY3;WDFY3	NM_178585;NM_014991;NM_178585	5'UTR;Body;1stExon		TRUE
cg17178291	0.225418	0.552559	0.32714	cg17178291	37	15	102156803	15	99974326					TRUE
cg14697334	0.226201	0.56144	0.335239	cg14697334	37	17	37784699	17	35038225	PPP1R1B;PPP1R1B	NM_181505;NM_032192	TSS200;Body	S_Shore	TRUE
cg03312856	0.564763	0.90655	0.341786	cg03312856	37	16	84219629	16	82777130	TAF1C;TAF1C	NM_139353;NM_005679	5'UTR;5'UTR	N_Shore		Promoter_Associated
cg09690103	0.386973	0.731229	0.344256	cg09690103	37	4	14603924	4	14213022					TRUE
cg01074325	0.128962	0.477957	0.348995	cg01074325	37	6	30138178	6	30246157	TRIM15	NM_033229	Body	N_Shore		Unclassified
cg18064463	0.490793	0.84399	0.353197	cg18064463	37	4	189189431	4	189426425					TRUE
cg23049142	0.330818	0.71705	0.386232	cg23049142	37	5	3386533	5	3439533
cg08003613	0.0483871	0.505384	0.456997	cg08003613	37	5	92917334	5	92943090	FLJ42709;FLJ42709	NR_021491;NR_021490	TSS1500;TSS1500	Island		Unclassified
cg13600149	0.209388	0.683517	0.47413	cg13600149	37	9	98079129	9	97118950	FANCC	NM_000136	5'UTR	N_Shore

## Sheet: gain in SNF5oeRA7
	NCCIT SNF5oe RA7	NCCIT E/V RA7	E/VRA7-SNF5oeRA7	TargetID	GENOME_BUILD	CHR	MAPINFO	CHROMOSOME_36	COORDINATE_36	UCSC_REFGENE_NAME	UCSC_REFGENE_ACCESSION	UCSC_REFGENE_GROUP	RELATION_TO_UCSC_CPG_ISLAND	ENHANCER	REGULATORY_FEATURE_GROUP
cg00546005	0.916171	0.171818	-0.744354	cg00546005	37	20	49639153	20	49072560	KCNG1	NM_002237	5'UTR	Island
cg25939213	0.817998	0.119742	-0.698256	cg25939213	37	14	23340606	14	22410446	LRP10	NM_014045	TSS1500	N_Shore
cg15122171	0.75102	0.0566183	-0.694402	cg15122171	37	5	35229851	5	35265608	PRLR	NM_000949	5'UTR		TRUE	Unclassified_Cell_type_specific
cg19936032	0.836251	0.155914	-0.680337	cg19936032	37	6	24911414	6	25019393	FAM65B	NM_014722	TSS1500	S_Shore		Promoter_Associated
cg03558326	0.847331	0.16808	-0.679251	cg03558326	37	14	24423031	14	23492871	C14orf167;DHRS4;C14orf167;C14orf167;C14orf167	NR_023921;NM_021004;NR_023922;NR_023923;NR_023924	Body;1stExon;Body;Body;Body	Island		Promoter_Associated
cg24002388	0.80836	0.131346	-0.677014	cg24002388	37	8	38088736	8	38207893	DDHD2;DDHD2;DDHD2	NM_001164234;NM_001164232;NM_015214	TSS1500;TSS1500;TSS1500	Island		Promoter_Associated
cg01564268	0.804619	0.147782	-0.656837	cg01564268	37	17	36666953	17	33920479	ARHGAP23	NM_020876	Body	Island	TRUE	Unclassified_Cell_type_specific
cg18204584	0.821568	0.170853	-0.650715	cg18204584	37	2	223185249	2	222893493				Island
cg09793988	0.754065	0.116109	-0.637956	cg09793988	37	16	55543053	16	54100554	LPCAT2;LPCAT2	NM_017839;NM_017839	1stExon;5'UTR	Island
cg13921956	0.680121	0.0442086	-0.635913	cg13921956	37	2	12858555	2	12776006	TRIB2;TRIB2	NM_021643;NR_027303	1stExon;Body	Island
cg07184986	0.854336	0.226845	-0.62749	cg07184986	37	5	159714788	5	159647366	CCNJL	NM_024565	Body		TRUE
cg12879164	0.795031	0.168586	-0.626445	cg12879164	37	12	56862170	12	55148437	SPRYD4	NM_207344	TSS200			Promoter_Associated
cg26566046	0.819691	0.197429	-0.622262	cg26566046	37	12	80083628	12	78607759	PAWR	NM_002583	Body	Island
cg01558923	0.855911	0.23951	-0.616401	cg01558923	37	1	218520959	1	216587582	TGFB2;TGFB2	NM_003238;NM_001135599	Body;Body	S_Shore		Unclassified
cg02540440	0.663548	0.0594992	-0.604049	cg02540440	37	X	39866758	X	39751702				Island
cg00270878	0.713016	0.116935	-0.59608	cg00270878	37	11	64334217	11	64090793	SLC22A11	NM_018484	Body	N_Shore	TRUE	Unclassified_Cell_type_specific
cg14541870	0.722757	0.154666	-0.568091	cg14541870	37	12	122250380	12	120734763	SETD1B	NM_015048	Body	S_Shore		Promoter_Associated
cg16673702	0.741276	0.183232	-0.558043	cg16673702	37	8	97507592	8	97576768	SDC2	NM_002998	Body	Island		Unclassified
cg06769752	0.829073	0.272033	-0.55704	cg06769752	37	X	153978839	X	153632033	GAB3;GAB3	NM_001081573;NM_080612	Body;Body	Island		Promoter_Associated_Cell_type_specific
cg16917279	0.68931	0.133069	-0.556241	cg16917279	37	6	24403287	6	24511266	MRS2	NM_020662	1stExon	Island		Promoter_Associated
cg12743115	0.684211	0.130669	-0.553541	cg12743115	37	1	178995861	1	177262484	FAM20B	NM_014864	5'UTR	Island		Promoter_Associated
cg00440043	0.590055	0.0419121	-0.548143	cg00440043	37	10	31607300	10	31647306	ZEB1;ZEB1;ZEB1;LOC220930;ZEB1	NM_030751;NR_024285;NR_024287;NR_024284;NR_024286	TSS1500;TSS200;TSS1500;Body;TSS1500	Island		Promoter_Associated
ch.6.132373355F	0.702001	0.174155	-0.527846	ch.6.132373355F	36	6	132331662	6	132373355
cg20264566	0.609737	0.0831165	-0.526621	cg20264566	37	11	10316295	11	10272871	SBF2	NM_030962	TSS1500	Island
cg23464435	0.656725	0.133843	-0.522881	cg23464435	37	21	34864267	21	33786137	DNAJC28;DNAJC28	NM_017833;NM_001040192	TSS1500;TSS1500	Island		Promoter_Associated
cg00419759	0.659407	0.148142	-0.511265	cg00419759	37	1	114301964	1	114103487	PHTF1	NM_006608	TSS200	Island		Promoter_Associated
cg19935040	0.673499	0.16618	-0.50732	cg19935040	37	17	42432165	17	39787691	FAM171A2	NM_198475	Body	Island		Unclassified_Cell_type_specific
cg05240381	0.537936	0.0485437	-0.489392	cg05240381	37	11	71164349	11	70841997	NADSYN1	NM_018161	1stExon	Island		Promoter_Associated
cg00947019	0.621072	0.133699	-0.487373	cg00947019	37	7	44887958	7	44854483	H2AFV;H2AFV;H2AFV;H2AFV;H2AFV	NM_201516;NM_012412;NM_201436;NM_138635;NM_201517	TSS1500;TSS1500;TSS1500;TSS1500;TSS1500	Island		Promoter_Associated
cg07358855	0.730661	0.24856	-0.482101	cg07358855	37	8	99960843	8	100030019	OSR2;OSR2	NM_053001;NM_001142462	5'UTR;5'UTR	Island	TRUE
cg27196768	0.559526	0.0815868	-0.477939	cg27196768	37	15	98971673	15	96789196				Island	TRUE	Unclassified
cg23849169	0.918691	0.445558	-0.473132	cg23849169	37	6	29760495	6	29868474	HCG4	NR_002139	Body	Island		Promoter_Associated
cg17399352	0.743413	0.2724	-0.471012	cg17399352	37	17	74379779	17	71891374	SPHK1;SPHK1;SPHK1	NM_182965;NM_021972;NM_001142601	TSS1500;TSS1500;TSS1500	Island		Unclassified
cg19592235	0.556596	0.0880959	-0.4685	cg19592235	37	15	65360486	15	63147539	RASL12	NM_016563	TSS200	Island		Unclassified_Cell_type_specific
cg18096251	0.8807	0.416238	-0.464462	cg18096251	37	5	2205553	5	2258553
cg20510745	0.487472	0.0362209	-0.451251	cg20510745	37	13	52702493	13	51600494	NEK5	NM_199289	5'UTR	N_Shore		NonGene_Associated
cg03930948	0.587062	0.137082	-0.44998	cg03930948	37	17	5322888	17	5263612	RPAIN;RPAIN;RPAIN;RPAIN;RPAIN;RPAIN;RPAIN;NUP88;RPAIN;RPAIN;RPAIN;RPAIN;RPAIN;RPAIN;RPAIN	NR_027681;NM_001033002;NM_001160267;NR_027684;NR_027682;NR_027679;NM_001160266;NM_002532;NR_027683;NR_027678;NM_001160246;NM_001160243;NM_001160244;NR_027685;NR_027680	TSS200;TSS200;TSS200;TSS200;TSS200;TSS200;TSS200;1stExon;TSS200;TSS200;TSS200;TSS200;TSS200;TSS200;TSS200	Island		Promoter_Associated
cg05143116	0.821304	0.373171	-0.448133	cg05143116	37	15	76633086	15	74420141	ISL2	NM_145805	Body	Island
cg23173517	0.583161	0.136174	-0.446987	cg23173517	37	15	81567548	15	79354603	IL16	NM_172217	Body		TRUE	Unclassified
cg13438300	0.580855	0.135688	-0.445167	cg13438300	37	1	32254265	1	32026852				Island		Promoter_Associated
cg09301222	0.499751	0.062889	-0.436862	cg09301222	37	2	149267116	2	148983586	MBD5	NM_018328	Body		TRUE	Unclassified
cg18173830	0.569314	0.132818	-0.436496	cg18173830	37	6	4776623	6	4721622	CDYL;CDYL	NR_026590;NM_004824	Body;TSS200	Island		Promoter_Associated
cg23699239	0.476087	0.0428489	-0.433238	cg23699239	37	22	21356776	22	19686776	FLJ39582;THAP7;FLJ39582;THAP7	NR_027051;NM_030573;NR_027052;NM_001008695	Body;TSS1500;Body;TSS1500	Island		Unclassified
cg07892785	0.467262	0.0410526	-0.426209	cg07892785	37	3	39851788	3	39826792	MYRIP	NM_015460	5'UTR	Island
cg02511809	0.512454	0.0893939	-0.42306	cg02511809	37	5	112073544	5	112101443	APC;APC;APC	NM_000038;NM_001127510;NM_001127511	TSS200;TSS200;5'UTR			Promoter_Associated
cg01433556	0.549596	0.127988	-0.421609	cg01433556	37	1	169454559	1	167721183	SLC19A2	NM_006996	Body	Island		Promoter_Associated
cg26268701	0.682159	0.277354	-0.404805	cg26268701	37	6	29894737	6	30002716	HCG4P6	NR_001317	TSS1500	Island		Promoter_Associated
cg07750111	0.522852	0.133367	-0.389485	cg07750111	37	6	26056168	6	26164147	HIST1H1C	NM_005319	1stExon	Island		Promoter_Associated
cg23237314	0.70224	0.312834	-0.389406	cg23237314	37	6	29894197	6	30002176	HCG4P6	NR_001317	TSS1500	Island		Promoter_Associated
cg06723492	0.482595	0.101481	-0.381113	cg06723492	37	1	161135296	1	159401920	PPOX;USP21;PPOX;USP21	NM_001122764;NM_012475;NM_000309;NM_001014443	TSS1500;3'UTR;TSS1500;3'UTR	N_Shore		Promoter_Associated
cg11078683	0.422861	0.0464572	-0.376404	cg11078683	37	17	35293168	17	32367281	LHX1	NM_005568	TSS1500	Island
cg25183890	0.401158	0.0268123	-0.374346	cg25183890	37	8	94929275	8	94998451	PDP1;PDP1;PDP1;PDP1;PDP1;PDP1;PDP1;PDP1	NM_001161780;NM_001161780;NM_018444;NM_001161778;NM_001161781;NM_018444;NM_001161779;NM_001161779	1stExon;5'UTR;1stExon;TSS1500;TSS200;5'UTR;5'UTR;1stExon	Island
cg06087619	0.733196	0.361111	-0.372085	cg06087619	37	12	54324895	12	52611162				S_Shelf
cg08127941	0.49419	0.128254	-0.365936	cg08127941	37	6	30293955	6	30401934	TRIM39;HCG18;HCG18;TRIM39	NM_021253;NR_024052;NR_024053;NM_172016	TSS1500;Body;Body;TSS1500	N_Shore
cg14421582	0.951526	0.586966	-0.36456	cg14421582	37	1	3481668	1	3471528	MEGF6	NM_001409	Body			Unclassified
cg07095997	0.397187	0.037457	-0.359729	cg07095997	37	14	61188431	14	60258184	SIX4	NM_017420	Body	Island		Unclassified_Cell_type_specific
cg19793366	0.976228	0.617496	-0.358732	cg19793366	37	13	19183507	13	18081507				Island
cg00549772	0.421335	0.0632716	-0.358064	cg00549772	37	8	65286333	8	65448887				Island
cg20448617	0.980687	0.625	-0.355687	cg20448617	37	7	157647893	7	157340654	PTPRN2;PTPRN2;PTPRN2	NM_002847;NM_130842;NM_130843	Body;Body;Body	Island
cg08173216	0.536062	0.182426	-0.353636	cg08173216	37	15	41524250	15	39311542	CHP;EXD1	NM_007236;NM_152596	Body;TSS1500	S_Shore		Promoter_Associated
cg21061731	0.454212	0.100726	-0.353487	cg21061731	37	11	44116994	11	44073570	EXT2;EXT2	NM_000401;NM_207122	TSS200;TSS200	N_Shore		Promoter_Associated
ch.2.4281665R	0.538295	0.198237	-0.340058	ch.2.4281665R	36	2	215705033	2	215413277
cg12299213	0.374373	0.0363697	-0.338004	cg12299213	37	19	40791383	19	45483223	AKT2	NM_001626	TSS200	Island		Promoter_Associated
cg20001978	0.594581	0.257087	-0.337494	cg20001978	37	X	72434661	X	72351386	NAP1L2;NAP1L2	NM_021963;NM_021963	1stExon;5'UTR			Unclassified_Cell_type_specific
cg05876864	0.973708	0.645241	-0.328467	cg05876864	37	5	176831638	5	176764244	F12	NM_000505	Body	Island		Promoter_Associated
cg13649658	0.83195	0.503885	-0.328064	cg13649658	37	9	140680393	9	139800214	EHMT1	NM_024757	Body	N_Shelf	TRUE
cg19355182	0.893512	0.565971	-0.327541	cg19355182	37	19	10543010	19	10404010	PDE4A;PDE4A;PDE4A	NM_001111308;NM_001111309;NM_001111307	Body;TSS200;Body	Island	TRUE
cg02503824	0.518958	0.192912	-0.326046	cg02503824	37	9	135036868	9	134026689	NTNG2	NM_032536	TSS1500	Island		Unclassified
cg24152818	0.616516	0.291217	-0.325299	cg24152818	37	13	72259543	13	71157544	DACH1;DACH1;DACH1	NM_004392;NM_080760;NM_080759	Body;Body;Body		TRUE
ch.14.782543R	0.467209	0.142499	-0.324709	ch.14.782543R	36	14	61549847	14	60619599
cg25728174	0.446066	0.124558	-0.321508	cg25728174	37	19	51814782	19	56506594	IGLON5	NM_001101372	TSS1500	N_Shore		Unclassified_Cell_type_specific
cg26630791	0.393372	0.0727802	-0.320592	cg26630791	37	5	83017000	5	83052756	HAPLN1	NM_001884	TSS200	N_Shore
cg20712912	0.405322	0.0854229	-0.319899	cg20712912	37	2	48648104	2	48501608						Unclassified
cg02312365	0.37438	0.0581627	-0.316218	cg02312365	37	2	128784989	2	128501459	SAP130;SAP130	NM_001145928;NM_024545	TSS200;TSS200	Island		Promoter_Associated
cg10128166	0.922409	0.608492	-0.313917	cg10128166	37	6	32812221	6	32920199	PSMB8;PSMB8;PSMB8	NM_004159;NM_148919;NM_004159	5'UTR;TSS1500;1stExon	S_Shore		Promoter_Associated
cg19145387	0.407792	0.0948276	-0.312965	cg19145387	37	8	64081751	8	64244305	YTHDF3	NM_152758	Body	Island		Unclassified
cg17032005	0.947307	0.638259	-0.309048	cg17032005	37	1	92891301	1	92663889					TRUE
cg19337593	0.321398	0.0134571	-0.307941	cg19337593	37	19	12792478	19	12653478	DHPS;DHPS;DHPS	NM_013406;NM_001930;NM_013407	1stExon;1stExon;1stExon	Island		Promoter_Associated
cg15659132	0.47644	0.169248	-0.307192	cg15659132	37	6	26577336	6	26685315
cg10699852	0.749191	0.442219	-0.306972	cg10699852	37	3	195863402	3	197347799					TRUE
cg06604058	0.356946	0.0502109	-0.306735	cg06604058	37	11	63448992	11	63205568	RTN3;RTN3;RTN3;RTN3;RTN3;RTN3;RTN3;RTN3	NM_201430;NM_006054;NM_201428;NM_201429;NM_006054;NM_201430;NM_201429;NM_201428	1stExon;1stExon;1stExon;5'UTR;5'UTR;5'UTR;1stExon;5'UTR	Island		Promoter_Associated
cg06641749	0.915786	0.609267	-0.306519	cg06641749	37	5	177662552	5	177595158				S_Shelf		Unclassified
cg04608290	0.372988	0.069869	-0.303119	cg04608290	37	11	74109971	11	73787619	PGM2L1	NM_173582	TSS1500	S_Shore		Promoter_Associated
cg21063030	0.340767	0.0381633	-0.302604	cg21063030	37	5	127418924	5	127446823	SLC12A2;FLJ33630	NM_001046;NR_015360	TSS1500;TSS200	Island		Promoter_Associated
cg18675623	0.6456	0.34355	-0.30205	cg18675623	37	12	108165306	12	106689436				N_Shelf
cg23221915	0.3273	0.0262735	-0.301027	cg23221915	37	3	32148175	3	32123179	GPD1L;GPD1L	NM_015141;NM_015141	1stExon;5'UTR	Island		Promoter_Associated
cg11632617	0.444867	0.144822	-0.300045	cg11632617	37	15	75315747	15	73102800	PPCDC	NM_021823	TSS200	N_Shore		Promoter_Associated
cg20898358	0.612054	0.316634	-0.29542	cg20898358	37	17	16947406	17	16888131	MPRIP;MPRIP	NM_015134;NM_201274	Body;Body	S_Shore		Promoter_Associated_Cell_type_specific
cg20913491	0.451277	0.157178	-0.294099	cg20913491	37	2	62081177	2	61934681	FAM161A;FAM161A	NM_032180;NM_032180	1stExon;5'UTR	Island		Promoter_Associated
cg03696974	0.369073	0.0768956	-0.292177	cg03696974	37	16	29888670	16	29796171	SEZ6L2;SEZ6L2;SEZ6L2;SEZ6L2	NM_001114099;NM_201575;NM_001114100;NM_012410	Body;Body;Body;Body	S_Shore		Unclassified_Cell_type_specific
cg11791427	0.346953	0.0549795	-0.291974	cg11791427	37	7	73704194	7	73342130	CLIP2;CLIP2	NM_032421;NM_003388	5'UTR;5'UTR	S_Shore
cg15799395	0.561856	0.270548	-0.291308	cg15799395	37	6	28849168	6	28957147
cg02759888	0.321172	0.032368	-0.288804	cg02759888	37	15	63449753	15	61236806	RPS27L	NM_015920	TSS200	Island		Promoter_Associated
cg16170767	0.947906	0.660402	-0.287504	cg16170767	37	6	99290737	6	99397458				Island	TRUE
cg18262201	0.877727	0.590556	-0.287172	cg18262201	37	10	6187854	10	6227860	PFKFB3	NM_001145443	Body	Island		Promoter_Associated
cg12993916	0.626204	0.339719	-0.286485	cg12993916	37	6	15553155	6	15661134	DTNBP1;DTNBP1;DTNBP1	NM_183041;NM_183040;NM_032122	Body;Body;Body		TRUE
cg21937554	0.612245	0.328571	-0.283673	cg21937554	37	11	44331934	11	44288510	ALX4	NM_021926	TSS1500	N_Shore	TRUE
cg23970189	0.462796	0.180041	-0.282755	cg23970189	37	3	53926101	3	53901141	SELK	NM_021237	TSS200	Island		Promoter_Associated
cg20187670	0.436094	0.156408	-0.279686	cg20187670	37	19	1237242	19	1188242	C19orf26	NM_152769	5'UTR	Island		Unclassified_Cell_type_specific
cg13569486	0.592549	0.313754	-0.278796	cg13569486	37	11	8290738	11	8247314				S_Shore	TRUE
cg22605799	0.321918	0.0466144	-0.275303	cg22605799	37	17	65374541	17	62805003	PITPNC1;PITPNC1	NM_181671;NM_012417	Body;Body	Island		Promoter_Associated
cg15004027	0.415706	0.142571	-0.273135	cg15004027	37	11	71823924	11	71501572	C11orf51	NM_014042	TSS200	Island		Promoter_Associated
cg15204036	0.599686	0.327253	-0.272433	cg15204036	37	4	109684526	4	109903975	AGXT2L1;AGXT2L1;AGXT2L1;AGXT2L1;AGXT2L1	NR_027475;NR_027474;NM_031279;NM_001146590;NM_001146627	TSS1500;TSS1500;TSS1500;TSS1500;TSS1500	S_Shore
cg19752094	0.364947	0.0947155	-0.270232	cg19752094	37	11	76381800	11	76059448	LRRC32;LRRC32	NM_005512;NM_001128922	TSS1500;TSS200	Island		Unclassified
cg24503272	0.319573	0.0494797	-0.270093	cg24503272	37	6	160210831	6	160130821	MRPL18;TCP1;TCP1	NM_014161;NM_001008897;NM_030752	TSS1500;TSS200;TSS200	Island		Promoter_Associated
ch.11.87583764F	0.469767	0.201864	-0.267903	ch.11.87583764F	36	11	87944116	11	87583764
cg15699942	0.295644	0.0299763	-0.265668	cg15699942	37	12	50677255	12	48963522	LIMA1;LIMA1;LIMA1;LIMA1	NM_001113546;NM_016357;NM_001113546;NM_016357	5'UTR;1stExon;1stExon;5'UTR		TRUE	Promoter_Associated
cg16153146	0.391439	0.126986	-0.264453	cg16153146	37	X	40014151	X	39899095	BCOR;BCOR	NM_001123384;NM_001123383	5'UTR;5'UTR	Island
cg26856257	0.880062	0.616128	-0.263934	cg26856257	37	1	32805350	1	32577937				S_Shelf		Unclassified_Cell_type_specific
cg01205021	0.294043	0.0308145	-0.263229	cg01205021	37	16	84179027	16	82736528	LRRC50;HSDL1;LRRC50;HSDL1	NM_178452;NM_001146051;NM_178452;NM_031463	5'UTR;TSS1500;1stExon;TSS1500	Island		Promoter_Associated
cg07668908	0.380522	0.117314	-0.263208	cg07668908	37	4	81256792	4	81475816	C4orf22	NM_152770	TSS200	N_Shore		Unclassified
cg01917164	0.534923	0.272687	-0.262236	cg01917164	37	10	105111002	10	105100992	PCGF6;PCGF6	NM_032154;NM_001011663	TSS200;TSS200	Island		Promoter_Associated_Cell_type_specific
cg21682474	0.333437	0.0722417	-0.261195	cg21682474	37	13	33112475	13	32010475	N4BP2L2;N4BP2L2	NM_014887;NM_033111	5'UTR;5'UTR			Promoter_Associated
cg02938429	0.5811	0.320236	-0.260864	cg02938429	37	2	20646248	2	20509729	RHOB	NM_004040	TSS1500	N_Shore
cg25532501	0.310148	0.0495889	-0.260559	cg25532501	37	11	134201505	11	133706715	GLB1L2	NM_138342	TSS1500	N_Shore	TRUE	Unclassified
cg01584087	0.368138	0.108081	-0.260057	cg01584087	37	12	114918610	12	113402993						Unclassified_Cell_type_specific
cg25757017	0.454688	0.197129	-0.257559	cg25757017	37	12	10306462	12	10197729					TRUE	Promoter_Associated_Cell_type_specific
cg26636193	0.289089	0.0321923	-0.256897	cg26636193	37	5	146889265	5	146869458				Island
cg08893811	0.987132	0.730337	-0.256795	cg08893811	37	13	113426044	13	112474045	ATP11A;ATP11A	NM_015205;NM_032189	Body;Body	S_Shore
cg19198483	0.589763	0.334735	-0.255027	cg19198483	37	11	47616096	11	47572672	C1QTNF4	NM_031909	TSS200	S_Shore
cg16639922	0.281552	0.0271074	-0.254445	cg16639922	37	3	9975056	3	9950056	IL17RC;CRELD1;CRELD1;CRELD1;IL17RC;IL17RC	NM_153460;NM_015513;NM_001031717;NM_001077415;NM_153461;NM_032732	Body;TSS1500;TSS1500;TSS1500;Body;Body	Island		Promoter_Associated
cg18469938	0.371412	0.117096	-0.254316	cg18469938	37	11	66444632	11	66201208	RBM4B	NM_031492	5'UTR	N_Shore
cg27085821	0.384672	0.131807	-0.252865	cg27085821	37	16	30103624	16	30011125	TBX6	NM_004608	TSS1500	Island		Promoter_Associated
cg13552736	0.511044	0.259038	-0.252006	cg13552736	37	8	87354545	8	87423661	WWP1	NM_007013	TSS1500	Island		Promoter_Associated
ch.2.884792F	0.3789	0.127171	-0.25173	ch.2.884792F	36	2	36771024	2	36624527	CRIM1	NM_016441	Body
cg03209103	0.481876	0.23029	-0.251586	cg03209103	37	7	94284396	7	94122332	SGCE;SGCE;PEG10;SGCE;PEG10	NM_001099400;NM_001099401;NM_001040152;NM_003919;NM_015068	Body;Body;TSS1500;Body;TSS1500	N_Shore
cg03783062	0.27165	0.0224329	-0.249217	cg03783062	37	7	89874457	7	89712393	C7orf63;C7orf63	NM_001039706;NM_001160138	TSS200;TSS200	Island		Promoter_Associated
cg19836460	0.442882	0.194175	-0.248707	cg19836460	37	3	113251336	3	114734026	SIDT1;SIDT1	NM_017699;NM_017699	5'UTR;1stExon	N_Shore		Promoter_Associated
cg22126803	0.265038	0.0173455	-0.247692	cg22126803	37	1	43855764	1	43628351	C1orf84;MED8;MED8	NM_001012961;NM_052877;NM_201542	Body;TSS1500;TSS1500	Island		Promoter_Associated
cg01091951	0.825307	0.578056	-0.247252	cg01091951	37	5	42993450	5	43029207				N_Shore		Promoter_Associated
cg26309929	0.808561	0.561545	-0.247017	cg26309929	37	3	24083947	3	24058951					TRUE
cg08415417	0.273077	0.027214	-0.245863	cg08415417	37	6	160211403	6	160131393	TCP1;TCP1;MRPL18	NM_001008897;NM_030752;NM_014161	TSS1500;TSS1500;TSS200	Island		Promoter_Associated
cg17152375	0.322968	0.077147	-0.245821	cg17152375	37	X	48660379	X	48545323	HDAC6	NM_006044	TSS200	Island		Promoter_Associated
cg19542548	0.724872	0.48	-0.244872	cg19542548	37	3	11311058	3	11286058				N_Shelf
cg20683809	0.387994	0.146617	-0.241378	cg20683809	37	19	41601892	19	46293732	CYP2A13	NM_000766	3'UTR
cg06154495	0.2704	0.0293241	-0.241076	cg06154495	37	7	22862445	7	22828970	TOMM7	NM_019059	TSS200	Island		Promoter_Associated
cg23171636	0.806508	0.567068	-0.239441	cg23171636	37	15	52954695	15	50741987	KIAA1370	NM_019600	Body
cg20415529	0.380992	0.141679	-0.239313	cg20415529	37	4	57845134	4	57539891	POLR2B;POLR2B;C4orf14	NM_000938;NM_000938;NM_032313	5'UTR;1stExon;TSS1500	Island		Promoter_Associated
cg09650414	0.327425	0.0892019	-0.238223	cg09650414	37	2	153574329	2	153282575	ARL6IP6;ARL6IP6;PRPF40A	NR_024526;NM_152522;NM_017892	TSS200;TSS200;TSS1500	Island		NonGene_Associated
cg16240424	0.302413	0.0643575	-0.238056	cg16240424	37	2	131851392	2	131567862	FAM168B	NM_001009993	TSS1500	S_Shore		Promoter_Associated
cg26169020	0.283476	0.0456647	-0.237811	cg26169020	37	10	97416671	10	97406661	ALDH18A1;ALDH18A1	NM_001017423;NM_002860	TSS200;TSS200	Island		Promoter_Associated
cg24166966	0.275792	0.0380952	-0.237696	cg24166966	37	3	33319712	3	33294716	FBXL2	NM_012157	Body	S_Shore
cg22288637	0.414097	0.177554	-0.236542	cg22288637	37	7	92464428	7	92302364	CDK6;CDK6	NM_001145306;NM_001259	5'UTR;TSS1500	Island
cg24565820	0.314021	0.0790926	-0.234928	cg24565820	37	22	24372926	22	22702926	LOC391322	NM_001144931	TSS200	Island		Promoter_Associated
cg00422918	0.429368	0.194919	-0.234449	cg00422918	37	11	122847281	11	122352491				N_Shore
cg03979008	0.340083	0.106195	-0.233888	cg03979008	37	22	24129419	22	22459419	SMARCB1;SMARCB1	NM_003073;NM_001007468	1stExon;1stExon	Island		Promoter_Associated
cg11106865	0.821493	0.587988	-0.233504	cg11106865	37	4	185090043	4	185327037	ENPP6	NM_153343	Body	S_Shore	TRUE	Unclassified
cg08300346	0.528521	0.295263	-0.233259	cg08300346	37	11	113932106	11	113437316	ZBTB16;ZBTB16	NM_001018011;NM_006006	5'UTR;5'UTR	Island
cg16740746	0.505179	0.273196	-0.231983	cg16740746	37	16	78134345	16	76691846	WWOX;WWOX	NM_016373;NM_130791	Body;Body	S_Shore		Promoter_Associated
cg23117778	0.24621	0.0150805	-0.231129	cg23117778	37	20	1206693	20	1154693	RAD21L1	NM_001136566	TSS200	Island
cg10979160	0.565689	0.334981	-0.230708	cg10979160	37	8	2241727	8	2229134				N_Shore		Unclassified_Cell_type_specific
cg14366742	0.708279	0.477642	-0.230637	cg14366742	37	4	8546989	4	8597889
cg06176750	0.548507	0.319328	-0.22918	cg06176750	37	11	7112356	11	7068932	RBMXL2;RBMXL2	NM_014469;NM_014469	3'UTR;1stExon	S_Shore		Unclassified_Cell_type_specific
cg09371281	0.664086	0.435332	-0.228754	cg09371281	37	9	8858574	9	8848574	PTPRD;PTPRD	NM_002839;NM_130391	5'UTR;5'UTR	Island
cg10428733	0.64919	0.420624	-0.228566	cg10428733	37	6	44359274	6	44467252	CDC5L	NM_001253	Body	S_Shelf
cg01744331	0.313909	0.0855083	-0.228401	cg01744331	37	11	2722358	11	2678934	KCNQ1OT1;KCNQ1;KCNQ1	NR_002728;NM_000218;NM_181798	TSS1500;Body;Body	S_Shore
cg04439376	0.334875	0.106522	-0.228353	cg04439376	37	2	112812130	2	112528601	TMEM87B	NM_032824	TSS1500	Island		Promoter_Associated
cg20341836	0.566372	0.33805	-0.228321	cg20341836	37	6	29894228	6	30002207	HCG4P6	NR_001317	TSS1500	Island		Promoter_Associated
cg03513163	0.505232	0.278133	-0.227099	cg03513163	37	5	140431149	5	140411333	PCDHB1	NM_013340	1stExon		TRUE
cg15107884	0.501652	0.275571	-0.226081	cg15107884	37	3	38180343	3	38155347	MYD88	NM_002468	1stExon	Island		Promoter_Associated
cg18397864	0.350168	0.124219	-0.225949	cg18397864	37	18	35145473	18	33399471	BRUNOL4;BRUNOL4;BRUNOL4;BRUNOL4	NM_001025087;NM_001025089;NM_020180;NM_001025088	1stExon;1stExon;1stExon;1stExon	Island
cg02057386	0.336358	0.111437	-0.224921	cg02057386	37	4	103266655	4	103485678	SLC39A8;SLC39A8;SLC39A8	NM_001135147;NM_022154;NM_001135146	TSS1500;TSS1500;TSS200	Island		Promoter_Associated
cg23081670	0.27361	0.0491368	-0.224474	cg23081670	37	10	135122788	10	134972778	ZNF511;TUBGCP2	NM_145806;NM_006659	Body;TSS200	N_Shore		Promoter_Associated
cg22621663	0.893427	0.669717	-0.22371	cg22621663	37	3	87141719	3	87224409				S_Shelf
cg21909643	0.350077	0.126572	-0.223506	cg21909643	37	6	20534796	6	20642775	CDKAL1;CDKAL1	NM_017774;NM_017774	1stExon;5'UTR			Promoter_Associated
cg04550103	0.969583	0.747087	-0.222496	cg04550103	37	2	234762281	2	234427020	HJURP	NM_018410	Body	N_Shore		Promoter_Associated_Cell_type_specific
cg18620542	0.588326	0.366947	-0.221379	cg18620542	37	17	77389727	17	74901322	HRNBP3	NM_001082575	5'UTR			Unclassified
cg17906267	0.300106	0.0791646	-0.220941	cg17906267	37	1	95582329	1	95354917	TMEM56	NM_152487	TSS1500	N_Shore		Unclassified
cg12968518	0.297641	0.0773558	-0.220285	cg12968518	37	2	148602504	2	148318974	ACVR2A	NM_001616	TSS200	Island
cg12424921	0.929986	0.709736	-0.22025	cg12424921	37	11	63828039	11	63584615	MACROD1	NM_014067	Body		TRUE	Unclassified_Cell_type_specific
cg13522462	0.518122	0.298141	-0.219981	cg13522462	37	19	44576874	19	49268714	ZNF284	NM_001037813	5'UTR	S_Shore		Promoter_Associated
cg16088107	0.261794	0.0423367	-0.219457	cg16088107	37	12	133066646	12	131576719	FBRSL1	NM_001142641	TSS1500	N_Shore		Promoter_Associated
ch.14.270578R	0.697183	0.478528	-0.218655	ch.14.270578R	36	14	34102682	14	33172432	NPAS3;NPAS3;NPAS3;NPAS3	NM_001164749;NM_173159;NM_001165893;NM_022123	Body;Body;Body;Body
cg00166750	0.383026	0.165441	-0.217585	cg00166750	37	8	102138594	8	102207770				Island	TRUE	Promoter_Associated
cg05210910	0.259101	0.0417409	-0.21736	cg05210910	37	7	99102705	7	98940641	ZKSCAN5;ZKSCAN5;ZKSCAN5	NM_145102;NM_014569;NM_014569	5'UTR;1stExon;5'UTR	Island		Promoter_Associated
cg21076702	0.325776	0.108434	-0.217342	cg21076702	37	19	36979833	19	41671673	ZNF566;ZNF566;ZNF566;ZNF566	NM_001145345;NM_001145343;NM_001145344;NM_032838	5'UTR;5'UTR;5'UTR;5'UTR	N_Shore		Promoter_Associated
cg06527936	0.682456	0.466484	-0.215972	cg06527936	37	15	45996340	15	43783632				N_Shore
cg03506640	0.23474	0.0209109	-0.213829	cg03506640	37	14	85997753	14	85067506	FLRT2	NM_013231	5'UTR	Island
cg16087060	0.936215	0.722407	-0.213808	cg16087060	37	17	17622507	17	17563232	RAI1	NM_030665	5'UTR	N_Shelf		Unclassified_Cell_type_specific
cg21117559	0.646593	0.433172	-0.21342	cg21117559	37	13	33750464	13	32648464	STARD13;STARD13;STARD13	NM_052851;NM_178007;NM_178006	5'UTR;Body;Body		TRUE
cg04094193	0.703704	0.491055	-0.212649	cg04094193	37	4	69216103	4	68898698	YTHDC1;YTHDC1	NM_133370;NM_001031732	TSS1500;TSS1500	S_Shore		Promoter_Associated
cg11039789	0.229057	0.0170001	-0.212057	cg11039789	37	12	97301254	12	95825385	NEDD1;NEDD1;NEDD1;NEDD1;NEDD1	NM_001135176;NM_001135175;NM_001135177;NM_152905;NM_001135175	5'UTR;1stExon;5'UTR;5'UTR;5'UTR	Island
cg01745726	0.245148	0.034354	-0.210794	cg01745726	37	22	24129337	22	22459337	SMARCB1;SMARCB1;SMARCB1;SMARCB1	NM_003073;NM_001007468;NM_001007468;NM_003073	1stExon;5'UTR;1stExon;5'UTR	Island		Promoter_Associated
cg14276973	0.881175	0.670504	-0.210671	cg14276973	37	9	136882828	9	135872649				S_Shelf
cg10842008	0.421516	0.211142	-0.210374	cg10842008	37	1	24477838	1	24350425
cg15922956	0.252152	0.0419753	-0.210176	cg15922956	37	X	154254964	X	153908158	FUNDC2	NM_023934	TSS200	Island		Promoter_Associated
cg18516067	0.705729	0.497878	-0.207851	cg18516067	37	4	98239185	4	98458208					TRUE
cg22545138	0.549188	0.341385	-0.207803	cg22545138	37	7	23510005	7	23476530	IGF2BP3	NM_006547	TSS200	S_Shore		Promoter_Associated
cg06792724	0.23231	0.0246769	-0.207633	cg06792724	37	X	28605646	X	28515567	IL1RAPL1	NM_014271	TSS200
cg09741222	0.413609	0.206684	-0.206925	cg09741222	37	5	71604392	5	71640148	MRPS27	NM_015084	Body	Island		Promoter_Associated
cg02081006	0.299563	0.0933121	-0.206251	cg02081006	37	5	122430434	5	122458333	PRDM6	NM_001136239	Body	N_Shore	TRUE
ch.6.48633908R	0.476636	0.271327	-0.205309	ch.6.48633908R	36	6	48525949	6	48633908
cg20469935	0.377104	0.173475	-0.20363	cg20469935	37	X	130964757	X	130792438	LOC286467	NR_026975	TSS200			Promoter_Associated
cg25288627	0.636266	0.433673	-0.202593	cg25288627	37	12	117321635	12	115806018				S_Shore		Unclassified
cg01330280	0.270335	0.0682557	-0.202079	cg01330280	37	6	27776566	6	27884545	HIST1H3H;HIST1H2BL	NM_003536;NM_003519	TSS1500;TSS1500	N_Shore		Promoter_Associated_Cell_type_specific
cg13348877	0.24954	0.0478217	-0.201718	cg13348877	37	18	78005237	18	76106228	PARD6G;PARD6G	NM_032510;NM_032510	1stExon;5'UTR	Island		Unclassified
cg01276327	0.79635	0.594872	-0.201478	cg01276327	37	12	110322142	12	108806525				S_Shelf
cg24907569	0.876316	0.675132	-0.201184	cg24907569	37	8	90918972	8	90988145	OSGIN2;OSGIN2	NM_004337;NM_001126111	5'UTR;Body	S_Shelf
cg09615786	0.224701	0.0235224	-0.201178	cg09615786	37	3	98620581	3	100103271	DCBLD2	NM_080927	TSS200	Island		Promoter_Associated
cg01806025	0.266495	0.0660717	-0.200423	cg01806025	37	6	31621147	6	31729126	BAT3;BAT3;BAT3;BAT3	NM_004639;NM_001098534;NM_080702;NM_080703	TSS1500;TSS1500;TSS1500;TSS1500	Island		Promoter_Associated

## Sheet: lose in SNF5oeRA7
	NCCIT SNF5oe RA7	NCCIT E/V RA7	E/VRA7-SNF5oeRA7	TargetID	GENOME_BUILD	CHR	MAPINFO	CHROMOSOME_36	COORDINATE_36	UCSC_REFGENE_NAME	UCSC_REFGENE_ACCESSION	UCSC_REFGENE_GROUP	RELATION_TO_UCSC_CPG_ISLAND	ENHANCER	REGULATORY_FEATURE_GROUP
cg17790372	0.688652	0.888684	0.200031	cg17790372	37	5	56509962	5	56545719	GPBP1;GPBP1;GPBP1	NM_001127235;NM_022913;NM_001127236	Body;Body;1stExon
cg18829068	0.545708	0.745884	0.200176	cg18829068	37	11	94975774	11	94615422					TRUE
cg21008046	0.715622	0.916155	0.200533	cg21008046	37	11	11374837	11	11331413	CSNK2A1P;GALNTL4	NR_002207;NM_198516	Body;Body
cg09849871	0.231557	0.432143	0.200585	cg09849871	37	14	90794949	14	89864702	C14orf102;C14orf102	NM_199043;NM_017970	5'UTR;Body	N_Shelf
cg06448442	0.654501	0.855143	0.200642	cg06448442	37	6	137494919	6	137536612	IL22RA2;IL22RA2;IL22RA2	NM_181309;NM_181310;NM_052962	TSS200;TSS200;TSS200
cg14497879	0.690239	0.890909	0.20067	cg14497879	37	3	124654885	3	126137575	MUC13	NM_033049	TSS1500
cg17301379	0.68678	0.887665	0.200885	cg17301379	37	10	134622602	10	134472592				Island
cg27512565	0.743585	0.944731	0.201146	cg27512565	37	22	22024084	22	20354084	PPIL2;PPIL2;PPIL2	NM_014337;NM_148176;NM_148175	Body;Body;Body	S_Shelf
cg06889165	0.636045	0.837268	0.201223	cg06889165	37	14	90042580	14	89112333	PRO1768;FOXN3	NR_024620;NM_001085471	Body;5'UTR		TRUE
cg07351675	0.751385	0.952609	0.201224	cg07351675	37	7	1578263	7	1544789	MAFK	NM_002360	5'UTR	S_Shelf		Gene_Associated_Cell_type_specific
cg01090926	0.623756	0.824981	0.201225	cg01090926	37	14	75137805	14	74207558	KIAA0317	NM_001039479	Body		TRUE
cg13216124	0.656142	0.857562	0.20142	cg13216124	37	8	23285320	8	23341265					TRUE
cg22335954	0.656483	0.858126	0.201643	cg22335954	37	8	121166405	8	121235586	COL14A1	NM_021110	Body		TRUE
cg05176551	0.606492	0.808196	0.201704	cg05176551	37	10	32701586	10	32741592					TRUE
cg18786237	0.619835	0.821692	0.201858	cg18786237	37	8	1182281	8	1169688				N_Shelf
cg16303478	0.675189	0.877056	0.201867	cg16303478	37	10	86902136	10	86892116
cg01597480	0.383987	0.585897	0.201911	cg01597480	37	7	120629404	7	120416640	C7orf58;C7orf58	NM_024913;NM_001105533	5'UTR;TSS200			Unclassified_Cell_type_specific
ch.3.3299193F	0.343434	0.545455	0.20202	ch.3.3299193F	36	3	169846325	3	171329018	PHC3	NM_024947	Body
cg08071595	0.590821	0.792848	0.202027	cg08071595	37	22	21538194	22	19868194				Island
cg26628279	0.714605	0.916688	0.202084	cg26628279	37	8	58059068	8	58221622				S_Shelf
cg02025737	0.577608	0.77992	0.202312	cg02025737	37	15	33384751	15	31172043					TRUE
cg01220829	0.62486	0.827289	0.202429	cg01220829	37	10	92681957	10	92671937	ANKRD1	NM_014391	TSS1500
cg16863052	0.528526	0.731219	0.202693	cg16863052	37	8	47015854	8	47135019
cg26467187	0.630614	0.833333	0.20272	cg26467187	37	8	53864533	8	54027086
cg08373250	0.21055	0.413305	0.202755	cg08373250	37	8	120438409	8	120507590					TRUE
cg07929082	0.682502	0.885396	0.202895	cg07929082	37	4	1671751	4	1641549	FAM53A	NM_001013622	5'UTR
cg13848981	0.428125	0.631025	0.2029	cg13848981	37	15	82287778	15	80074833
cg08706141	0.720187	0.923128	0.202941	cg08706141	37	22	20073403	22	18453403	MIR1306;DGCR8	NR_031706;NM_022720	TSS200;5'UTR	Island
cg19016816	0.455585	0.658676	0.203091	cg19016816	37	7	1267987	7	1234513				N_Shore		Unclassified_Cell_type_specific
cg14140403	0.556757	0.75985	0.203093	cg14140403	37	4	908952	4	898952	GAK	NM_005255	Body	Island
cg25478114	0.486736	0.689911	0.203175	cg25478114	37	6	19328477	6	19436456					TRUE
cg22827501	0.750613	0.95383	0.203217	cg22827501	37	12	132637734	12	131203687				N_Shore		Unclassified
cg03333602	0.612228	0.815486	0.203258	cg03333602	37	10	69370143	10	69040149	CTNNA3;CTNNA3	NM_001127384;NM_013266	Body;Body		TRUE
cg24934316	0.720952	0.924259	0.203308	cg24934316	37	19	14598428	19	14459428	GIPC1;GIPC1;LOC100130932;GIPC1;GIPC1;GIPC1;GIPC1	NM_202469;NM_202467;NM_001146693;NM_202470;NM_202494;NM_202468;NM_005716	5'UTR;5'UTR;TSS1500;5'UTR;5'UTR;5'UTR;5'UTR
cg19016782	0.716061	0.91944	0.203378	cg19016782	37	12	123741754	12	122307707	C12orf65;C12orf65	NM_001143905;NM_152269	3'UTR;3'UTR
cg05509179	0.533835	0.737251	0.203416	cg05509179	37	3	64887780	3	64862820	MIR548A2	NR_030317	Body		TRUE
cg03441770	0.660273	0.863693	0.20342	cg03441770	37	4	81128845	4	81347869				S_Shore	TRUE
cg23977502	0.669643	0.873223	0.20358	cg23977502	37	7	143211367	7	142921489				S_Shelf
cg09168997	0.635703	0.839399	0.203696	cg09168997	37	1	160085132	1	158351756	ATP1A2	NM_000702	TSS1500
cg00930244	0.703208	0.906917	0.203709	cg00930244	37	7	39870522	7	39837047				N_Shelf
cg02549424	0.340381	0.544118	0.203737	cg02549424	37	22	21319123	22	19649123	AIFM3;AIFM3	NM_001018060;NM_144704	TSS1500;TSS1500	N_Shore		Unclassified_Cell_type_specific
cg13976251	0.545763	0.749591	0.203828	cg13976251	37	8	64325777	8	64488331
cg02522370	0.521511	0.725647	0.204136	cg02522370	37	X	12992795	X	12902716	TMSL3;TMSB4X	NM_183049;NM_021109	TSS1500;TSS1500	N_Shore		Promoter_Associated
cg19698099	0.655702	0.859911	0.204209	cg19698099	37	2	189897254	2	189605499	COL5A2	NM_000393	3'UTR
cg15979937	0.689311	0.893536	0.204225	cg15979937	37	2	69336567	2	69190071	ANTXR1;ANTXR1;ANTXR1	NM_053034;NM_032208;NM_018153	Body;Body;Body
cg10894718	0.668297	0.872673	0.204376	cg10894718	37	8	11184217	8	11221627	MTMR9	NM_015458	3'UTR
cg12861602	0.580479	0.785168	0.204689	cg12861602	37	8	99045811	8	99114987	MATN2;MATN2	NM_030583;NM_002380	Body;Body		TRUE
cg07476963	0.48993	0.694625	0.204695	cg07476963	37	1	174127462	1	172394085	RABGAP1L	NM_014857	TSS1500	N_Shore
cg19144071	0.489227	0.694038	0.204812	cg19144071	37	17	37735925	17	34989451					TRUE
cg14297518	0.692968	0.897858	0.20489	cg14297518	37	11	33112779	11	33069355	CSTF3	NM_001326	Body
cg19968946	0.538633	0.743525	0.204892	cg19968946	37	3	73481531	3	73564221	PDZRN3	NM_015009	Body		TRUE	Unclassified
cg10081469	0.695918	0.901039	0.205121	cg10081469	37	14	61748336	14	60818089	TMEM30B;TMEM30B	NM_001017970;NM_001017970	1stExon;5'UTR	S_Shore		Unclassified_Cell_type_specific
ch.9.919537F	0.265411	0.470588	0.205177	ch.9.919537F	36	9	76690975	9	75880794
cg14103147	0.651863	0.857209	0.205346	cg14103147	37	9	112299270	9	111339091				S_Shelf
cg13780945	0.640085	0.845508	0.205423	cg13780945	37	X	38144773	X	38029717	RPGR;RPGR	NM_000328;NM_001034853	Body;3'UTR
cg16116973	0.192213	0.397695	0.205482	cg16116973	37	20	33759608	20	33223269	PROCR	NM_006404	TSS200	N_Shelf		Unclassified_Cell_type_specific
cg02737022	0.720988	0.92674	0.205752	cg02737022	37	1	246761343	1	244827966	CNST;CNST	NM_001139459;NM_152609	Body;Body		TRUE
cg01192051	0.640609	0.846488	0.205879	cg01192051	37	15	89879515	15	87680519	POLG;POLG	NM_001126131;NM_002693	TSS1500;TSS1500	S_Shore
cg10623221	0.68538	0.891352	0.205972	cg10623221	37	3	173119212	3	174601906	NLGN1	NM_014932	5'UTR	S_Shelf
cg03554194	0.675482	0.88157	0.206087	cg03554194	37	3	110831177	3	112313867	PVRL3	NM_015480	Body		TRUE
cg10995473	0.665306	0.87149	0.206184	cg10995473	37	17	8872104	17	8812829				S_Shelf
cg12515917	0.689726	0.896057	0.206331	cg12515917	37	8	133894086	8	133963268	TG	NM_003235	Body		TRUE
cg02227026	0.566705	0.773038	0.206334	cg02227026	37	8	8173791	8	8211201				N_Shore
cg06482188	0.591752	0.798092	0.20634	cg06482188	37	17	77644545	17	75259140					TRUE
cg22174337	0.545987	0.752464	0.206478	cg22174337	37	3	156005296	3	157487990	KCNAB1;KCNAB1	NM_003471;NM_172160	Body;Body	N_Shelf
cg06766636	0.495413	0.701929	0.206517	cg06766636	37	6	116598395	6	116705088	TSPYL1;TSPYL1	NM_003309;NM_003309	1stExon;3'UTR	N_Shelf		Promoter_Associated_Cell_type_specific
cg07057235	0.694629	0.901286	0.206656	cg07057235	37	16	89033895	16	87561396	CBFA2T3	NM_005187	Body	N_Shore		Unclassified_Cell_type_specific
cg04995521	0.389542	0.596386	0.206843	cg04995521	37	1	8468871	1	8391458	RERE;RERE;RERE	NM_001042682;NM_012102;NM_001042681	5'UTR;Body;Body		TRUE	Promoter_Associated
cg05384628	0.70971	0.916581	0.206872	cg05384628	37	4	183814948	4	184051942	DCTD;DCTD	NM_001921;NM_001012732	Body;Body
cg25633045	0.674104	0.881034	0.20693	cg25633045	37	17	28458728	17	25482854	CCDC55	NM_032141	Body		TRUE
cg07062747	0.656228	0.863204	0.206976	cg07062747	37	3	28122982	3	28097986					TRUE
cg24171915	0.615245	0.822358	0.207113	cg24171915	37	13	111978024	13	110776025	C13orf16	NM_152324	Body	N_Shore
cg25708982	0.644202	0.851351	0.207149	cg25708982	37	13	112895431	13	111943432				Island
cg19790543	0.70028	0.907769	0.207489	cg19790543	37	11	101587210	11	101092420					TRUE
cg14220887	0.492044	0.699561	0.207517	cg14220887	37	14	76130978	14	75200731	TTLL5	NM_015072	Body	S_Shelf
cg03502001	0.666523	0.874085	0.207562	cg03502001	37	13	29298122	13	28196122
cg18378551	0.703143	0.910714	0.207571	cg18378551	37	11	84844436	11	84522084	DLG2	NM_001142699	Body		TRUE
cg22140583	0.656083	0.863744	0.207661	cg22140583	37	5	113723647	5	113751546	KCNN2	NM_021614	Body		TRUE
cg08783934	0.622894	0.830592	0.207697	cg08783934	37	8	18523840	8	18568120	PSD3;PSD3	NM_206909;NM_015310	Body;Body		TRUE
cg04600792	0.725113	0.932871	0.207758	cg04600792	37	7	29256702	7	29223227	CHN2	NM_004067	Body		TRUE
cg02417360	0.670343	0.878196	0.207853	cg02417360	37	13	113398673	13	112446674	ATP11A;ATP11A	NM_015205;NM_032189	Body;Body		TRUE
cg14480831	0.688725	0.896647	0.207922	cg14480831	37	14	102966807	14	102036560	TECPR2	NM_014844	3'UTR			Unclassified_Cell_type_specific
cg03548123	0.41103	0.618977	0.207947	cg03548123	37	19	1672090	19	1623090				Island		Unclassified
cg04947555	0.678176	0.886149	0.207973	cg04947555	37	2	160764918	2	160473164				S_Shelf
cg19816379	0.575472	0.78346	0.207988	cg19816379	37	7	117852104	7	117639340				N_Shelf
cg26547526	0.657495	0.865633	0.208139	cg26547526	37	10	2666743	10	2656743
cg18101784	0.68456	0.892836	0.208276	cg18101784	37	4	852280	4	842280	GAK	NM_005255	Body
cg04589118	0.488636	0.697376	0.208739	cg04589118	37	4	2848840	4	2818638	ADD1;ADD1;ADD1;ADD1	NM_001119;NM_014190;NM_014189;NM_176801	5'UTR;5'UTR;5'UTR;5'UTR	S_Shelf
cg23368162	0.473054	0.681979	0.208925	cg23368162	37	6	30314115	6	30422094	RPP21	NM_024839	Body	S_Shore
cg08373622	0.694717	0.903984	0.209267	cg08373622	37	3	87036080	3	87118770	VGLL3	NM_016206	Body	N_Shelf
cg11130780	0.598678	0.807966	0.209288	cg11130780	37	10	1213469	10	1203469				S_Shelf
cg07037045	0.630799	0.840139	0.20934	cg07037045	37	6	86324743	6	86381462	SYNCRIP;SYNCRIP;SYNCRIP;SYNCRIP;SYNCRIP;SYNCRIP	NM_001159675;NM_006372;NM_001159674;NM_001159673;NM_001159677;NM_001159676	Body;Body;Body;Body;Body;Body
cg09949666	0.58457	0.793933	0.209363	cg09949666	37	7	43678966	7	43645491	C7orf44	NM_018224	3'UTR
cg00282267	0.57923	0.788628	0.209398	cg00282267	37	7	36803916	7	36770441
cg03312170	0.704241	0.913695	0.209453	cg03312170	37	16	53815126	16	52372627	FTO	NM_001080432	Body		TRUE
cg09439867	0.262353	0.472149	0.209796	cg09439867	37	10	120018076	10	120008066					TRUE
cg07744648	0.657071	0.866889	0.209817	cg07744648	37	8	98841383	8	98910559	LAPTM4B	NM_018407	Body		TRUE
cg17795695	0.705361	0.915237	0.209876	cg17795695	37	4	6344449	4	6395350	PPP2R2C;PPP2R2C	NM_181876;NM_020416	Body;Body
cg14687930	0.583333	0.793249	0.209916	cg14687930	37	13	113125773	13	112173774				S_Shelf
cg18689402	0.569672	0.779609	0.209937	cg18689402	37	3	4630986	3	4605986	ITPR1;ITPR1;ITPR1	NM_002222;NM_001099952;NM_001168272	Body;Body;Body		TRUE
cg04216575	0.644745	0.854896	0.210151	cg04216575	37	6	32371488	6	32479466	BTNL2	NM_019602	Body
cg01080552	0.618912	0.829097	0.210185	cg01080552	37	X	2986093	X	2996093	ARSF	NM_004042	5'UTR
cg17374433	0.616563	0.826809	0.210246	cg17374433	37	10	119876327	10	119866317	CASC2;CASC2	NR_026940;NR_026939	Body;Body		TRUE
cg05555653	0.644946	0.855362	0.210415	cg05555653	37	8	123964437	8	124033618	ZHX2	NM_014943	Body
cg23898213	0.379974	0.590413	0.210439	cg23898213	37	X	62979075	X	62895800				S_Shelf
cg10088941	0.423319	0.633768	0.21045	cg10088941	37	6	43608807	6	43716785				N_Shelf
ch.8.1247165R	0.144289	0.354839	0.21055	ch.8.1247165R	36	8	56836682	8	56999235	LYN;LYN	NM_002350;NM_001111097	5'UTR;5'UTR
cg26292018	0.722182	0.932942	0.21076	cg26292018	37	8	133787071	8	133856253	PHF20L1;PHF20L1;PHF20L1	NM_198513;NM_032205;NM_016018	TSS1500;TSS1500;TSS1500	N_Shore		Promoter_Associated
cg18332213	0.638374	0.849213	0.210839	cg18332213	37	6	169682412	6	169424337
cg00172225	0.623197	0.834072	0.210875	cg00172225	37	10	124912800	10	124902790	BUB3;BUB3	NM_004725;NM_001007793	TSS1500;TSS1500	N_Shore		Unclassified_Cell_type_specific
cg05849772	0.750311	0.961275	0.210964	cg05849772	37	16	303182	16	243183	ITFG3	NM_032039	5'UTR			Unclassified_Cell_type_specific
cg03644691	0.643279	0.85459	0.211311	cg03644691	37	5	140482926	5	140463110	PCDHB3;PCDHB3	NM_018937;NM_018937	1stExon;3'UTR	S_Shore
cg13973594	0.605384	0.816819	0.211435	cg13973594	37	14	60339823	14	59409576				S_Shelf
cg07710391	0.668464	0.879977	0.211513	cg07710391	37	8	131337826	8	131407008	ASAP1	NM_018482	Body		TRUE
cg00063699	0.662431	0.873984	0.211553	cg00063699	37	1	214624242	1	212690865	PTPN14	NM_005401	Body
cg16717546	0.676699	0.888319	0.21162	cg16717546	37	7	24474486	7	24441011					TRUE
cg19322969	0.709978	0.921741	0.211763	cg19322969	37	1	226854847	1	224921470	ITPKB	NM_002221	Body		TRUE
cg11902748	0.627301	0.839192	0.21189	cg11902748	37	20	36035466	20	35468880				S_Shore	TRUE	Unclassified_Cell_type_specific
cg26335127	0.211901	0.423899	0.211998	cg26335127	37	14	55595666	14	54665419	LGALS3	NM_002306	TSS1500	N_Shore		Unclassified
cg15744134	0.162089	0.374359	0.21227	cg15744134	37	15	32933835	15	30721127	SCG5;SCG5	NM_003020;NM_001144757	TSS200;TSS200
cg16659407	0.640635	0.853117	0.212482	cg16659407	37	8	98653091	8	98722267				N_Shelf
cg25682829	0.672095	0.884686	0.212591	cg25682829	37	6	109457859	6	109564552	C6orf182;C6orf182	NM_001083535;NM_173830	5'UTR;5'UTR
cg02647265	0.334262	0.546958	0.212696	cg02647265	37	12	124456164	12	123022117	CCDC92	NM_025140	5'UTR	N_Shore
cg16163168	0.454824	0.667752	0.212929	cg16163168	37	2	178160898	2	177869144	LOC100130691	NR_026966	Body		TRUE	Unclassified
cg13042918	0.744796	0.957742	0.212946	cg13042918	37	4	119948542	4	120167990	SYNPO2;SYNPO2;SYNPO2	NM_001128934;NM_133477;NM_001128933	Body;Body;Body		TRUE
cg20941528	0.626758	0.839786	0.213029	cg20941528	37	6	132967732	6	133009425	TAAR1	NM_138327	TSS1500
cg12501523	0.687555	0.900923	0.213368	cg12501523	37	4	187037256	4	187274250
cg13337295	0.503977	0.71743	0.213453	cg13337295	37	7	30624246	7	30590771					TRUE
cg21653149	0.721244	0.934719	0.213475	cg21653149	37	17	4108148	17	4054897	ANKFY1;ANKFY1	NM_016376;NM_020740	Body;Body		TRUE
cg14330143	0.705301	0.91878	0.213479	cg14330143	37	14	78450828	14	77520581				S_Shelf
cg19713638	0.715356	0.929122	0.213766	cg19713638	37	13	47175890	13	46073891	LRCH1;LRCH1;LRCH1	NM_015116;NM_001164213;NM_001164211	Body;Body;Body		TRUE
cg15602215	0.362046	0.576023	0.213978	cg15602215	37	8	102772842	8	102842018	NCALD;NCALD;NCALD;NCALD;NCALD;NCALD;NCALD;NCALD	NM_001040629;NM_001040624;NM_001040626;NM_001040630;NM_001040628;NM_001040625;NM_001040627;NM_032041	5'UTR;5'UTR;5'UTR;5'UTR;5'UTR;5'UTR;5'UTR;5'UTR		TRUE
cg26053469	0.573913	0.787898	0.213985	cg26053469	37	13	43646194	13	42544194	DNAJC15	NM_013238	Body		TRUE
cg06484232	0.641478	0.855624	0.214147	cg06484232	37	11	5905350	11	5861926	OR52E4	NM_001005165	TSS200
cg09167951	0.305989	0.520177	0.214188	cg09167951	37	4	139408972	4	139628422					TRUE
cg24738140	0.643038	0.857428	0.21439	cg24738140	37	17	76498535	17	74010130	DNAH17	NM_173628	Body	N_Shore
cg03756034	0.564498	0.77904	0.214542	cg03756034	37	2	161128396	2	160836642				S_Shore	TRUE
cg04741861	0.715836	0.930418	0.214582	cg04741861	37	19	3531604	19	3482604	FZR1;FZR1;FZR1	NM_001136197;NM_016263;NM_001136198	Body;Body;Body	Island		Unclassified_Cell_type_specific
cg06794612	0.712729	0.92733	0.214601	cg06794612	37	11	65695774	11	65452350					TRUE	Promoter_Associated
cg06067593	0.503721	0.718391	0.21467	cg06067593	37	4	176918809	4	177155803	GPM6A;GPM6A	NM_005277;NM_201592	5'UTR;Body	N_Shelf
cg11157172	0.652091	0.866865	0.214774	cg11157172	37	1	3210417	1	3200277	PRDM16;PRDM16	NM_022114;NM_199454	Body;Body
cg24555763	0.749437	0.964217	0.214779	cg24555763	37	8	53300817	8	53463370	ST18	NM_014682	5'UTR
cg02887114	0.377559	0.5928	0.215241	cg02887114	37	19	54568236	19	59260048	VSTM1	NM_198481	TSS1500
cg06751398	0.700269	0.915575	0.215306	cg06751398	37	18	77162457	18	75263445	NFATC1;NFATC1;NFATC1;NFATC1;NFATC1	NM_006162;NM_172388;NM_172389;NM_172387;NM_172390	Body;5'UTR;Body;Body;Body	S_Shore
cg13796975	0.692985	0.908448	0.215462	cg13796975	37	10	21467394	10	21507400				S_Shelf
cg05364766	0.205307	0.420846	0.215539	cg05364766	37	7	136832262	7	136482802					TRUE
cg01269798	0.435484	0.651138	0.215654	cg01269798	37	6	28972065	6	29080044	ZNF311	NM_001010877	5'UTR		TRUE
cg08378932	0.633197	0.849098	0.215901	cg08378932	37	3	149191167	3	150673857	TM4SF4	NM_004617	TSS1500		TRUE
cg23788917	0.252446	0.468543	0.216097	cg23788917	37	6	8435910	6	8380909	SLC35B3;SLC35B3;SLC35B3	NM_001142540;NM_001142541;NM_015948	TSS200;TSS200;TSS200	Island		Promoter_Associated
cg03358980	0.70559	0.921696	0.216105	cg03358980	37	10	102770406	10	102760396				S_Shelf
cg23601035	0.341437	0.557578	0.216141	cg23601035	37	2	87169982	2	87023493	RGPD1;RGPD2	NM_001024457;NM_001078170	Body;Body	Island
cg26629556	0.672209	0.888364	0.216155	cg26629556	37	8	121151992	8	121221173	COL14A1	NM_021110	5'UTR		TRUE
cg26422656	0.684484	0.900946	0.216462	cg26422656	37	2	238585054	2	238249793	LRRFIP1	NM_001137550	Body		TRUE
cg14042597	0.610191	0.826783	0.216592	cg14042597	37	22	18706050	22	17086050				S_Shelf
cg03901532	0.706119	0.922828	0.216709	cg03901532	37	2	36718460	2	36571964	CRIM1	NM_016441	Body		TRUE
cg08928494	0.395145	0.61201	0.216865	cg08928494	37	16	87952163	16	86509664	CA5A	NM_001739	Body	S_Shelf
cg19719207	0.733716	0.950776	0.21706	cg19719207	37	4	121839493	4	122058943	PRDM5	NM_018699	Body	N_Shelf
cg19793470	0.693407	0.910479	0.217073	cg19793470	37	X	19000406	X	18910327	PHKA2	NM_000292	Body	N_Shore
cg25889998	0.613718	0.83081	0.217091	cg25889998	37	17	1214951	17	1161701
cg01446217	0.534869	0.752117	0.217248	cg01446217	37	9	5831674	9	5821674	ERMP1	NM_024896	Body	N_Shore
cg02489189	0.699574	0.917059	0.217485	cg02489189	37	2	157049585	2	156757831					TRUE
cg14316679	0.655298	0.872807	0.217509	cg14316679	37	9	126634622	9	125674443	DENND1A;DENND1A	NM_024820;NM_020946	Body;Body		TRUE
ch.17.588105F	0.204239	0.421859	0.21762	ch.17.588105F	36	17	18208169	17	18148893	TOP3A	NM_004618	Body
cg15299568	0.572864	0.79067	0.217806	cg15299568	37	4	81449664	4	81668688	C4orf22	NM_152770	Body		TRUE
cg11136969	0.649057	0.866876	0.21782	cg11136969	37	8	23299153	8	23355098	ENTPD4;ENTPD4	NM_004901;NM_001128930	Body;Body
cg00559439	0.659676	0.877596	0.21792	cg00559439	37	3	11672517	3	11647517	VGLL4;VGLL4	NM_014667;NM_001128219	Body;Body
cg04706962	0.718867	0.936819	0.217953	cg04706962	37	8	915414	8	905414				Island
ch.7.2116294F	0.180978	0.399234	0.218256	ch.7.2116294F	36	7	99959526	7	99797461	PILRB;PILRB;PILRB	NM_178238;NM_013440;NM_175047	Body;Body;Body
cg07473599	0.60788	0.826172	0.218292	cg07473599	37	14	93674967	14	92744720	UBR7;UBR7	NM_175748;NM_001100417	Body;Body	S_Shore
cg22637772	0.6787	0.897035	0.218334	cg22637772	37	5	141572223	5	141552407					TRUE
cg19903805	0.410749	0.629393	0.218644	cg19903805	37	14	92333771	14	91403524	TC2N;TC2N	NM_001128596;NM_001128596	1stExon;5'UTR			Promoter_Associated_Cell_type_specific
cg23333723	0.587719	0.806548	0.218828	cg23333723	37	14	53022898	14	52092648	GPR137C	NM_001099652	Body	S_Shelf
cg13977169	0.66778	0.886693	0.218913	cg13977169	37	8	81071231	8	81233786	TPD52;TPD52	NM_005079;NM_001025253	Body;Body		TRUE
cg26303603	0.574547	0.793539	0.218992	cg26303603	37	5	149344707	5	149324900	SLC26A2	NM_000112	5'UTR	S_Shelf
cg26544752	0.546608	0.765666	0.219058	cg26544752	37	5	24524850	5	24560607	CDH10	NM_006727	Body
cg02819734	0.655287	0.874501	0.219214	cg02819734	37	16	3610582	16	3550583	NLRC3	NM_178844	Body	N_Shelf
cg10116456	0.590258	0.809777	0.219519	cg10116456	37	1	231838098	1	229904721	TSNAX-DISC1;DISC1;DISC1;DISC1;TSNAX-DISC1;DISC1;DISC1;DISC1;DISC1;TSNAX-DISC1;DISC1;DISC1;TSNAX-DISC1;TSNAX-DISC1;DISC1;DISC1;DISC1;DISC1;DISC1;TSNAX-DISC1;TSNAX-DISC1;DISC1;DISC1;DISC1;DISC1;DISC1;TSNAX-DISC1;DISC1;DISC1;DISC1;DISC1	NR_028394;NM_001164552;NM_001012959;NM_001164551;NR_028397;NM_001164553;NM_001012957;NM_001164541;NM_001164542;NR_028393;NM_001164550;NM_001164537;NR_028400;NR_028398;NM_001164548;NM_001164555;NM_018662;NM_001164539;NM_001164556;NR_028399;NR_028395;NM_001164540;NM_001164544;NM_001164538;NM_001164545;NM_001012958;NR_028396;NM_001164546;NM_001164547;NM_001164554;NM_001164549	Body;Body;Body;Body;Body;Body;Body;Body;Body;Body;Body;Body;Body;Body;Body;Body;Body;Body;Body;Body;Body;Body;Body;Body;Body;Body;Body;Body;Body;3'UTR;Body		TRUE
cg10068491	0.721098	0.94069	0.219592	cg10068491	37	16	3183125	16	3123126				N_Shore
cg10133738	0.663613	0.883388	0.219775	cg10133738	37	8	121384192	8	121453373	COL14A1	NM_021110	3'UTR
cg07511008	0.653203	0.87309	0.219888	cg07511008	37	15	58902656	15	56689948	ADAM10	NM_001110	Body		TRUE
cg12121765	0.616838	0.836803	0.219965	cg12121765	37	8	13365657	8	13410028	DLC1;DLC1	NM_024767;NM_182643	5'UTR;5'UTR
cg15265092	0.615807	0.835863	0.220057	cg15265092	37	6	34723499	6	34831477	SNRPC;SNRPC	NR_029472;NM_003093	TSS1500;TSS1500	N_Shore
cg04371703	0.695435	0.915573	0.220138	cg04371703	37	4	76602474	4	76821498				S_Shelf
cg05999010	0.726589	0.94696	0.220372	cg05999010	37	3	63881712	3	63856752	ATXN7;ATXN7	NM_000333;NM_001128149	5'UTR;5'UTR		TRUE
cg07030704	0.598266	0.818641	0.220375	cg07030704	37	11	112792759	11	112297969					TRUE
cg19584834	0.583887	0.804328	0.220441	cg19584834	37	19	39286793	19	43978633				S_Shelf
cg05423291	0.690529	0.910988	0.22046	cg05423291	37	8	142162931	8	142232113	DENND3	NM_014957	Body
cg07446677	0.648744	0.870013	0.221269	cg07446677	37	10	11784190	10	11824196	ECHDC3	NM_024693	TSS200	N_Shore		Unclassified
cg02531227	0.531387	0.752679	0.221292	cg02531227	37	12	129460621	12	128026574	GLT1D1	NM_144669	Body
cg26552733	0.63385	0.855164	0.221313	cg26552733	37	10	5542941	10	5532941	CALML5	NM_017422	TSS1500	S_Shore
cg05630943	0.656615	0.878113	0.221498	cg05630943	37	16	76521159	16	75078660	CNTNAP4;CNTNAP4	NM_033401;NM_138994	Body;Body		TRUE
cg06147651	0.513555	0.735094	0.221539	cg06147651	37	3	20115681	3	20090685	KAT2B	NM_003884	Body		TRUE
cg16419584	0.612981	0.834697	0.221716	cg16419584	37	10	129947858	10	129837848				Island
cg11760389	0.573756	0.795689	0.221933	cg11760389	37	6	29989120	6	30097099	NCRNA00171	NR_026751	Body
cg20171999	0.0991637	0.321123	0.22196	cg20171999	37	8	67343066	8	67505620				N_Shore
cg09694986	0.655797	0.877814	0.222016	cg09694986	37	8	121775052	8	121844233	SNTB1	NM_021021	Body		TRUE
cg19239304	0.736553	0.958712	0.222159	cg19239304	37	2	238621429	2	238286168	LRRFIP1;LRRFIP1;LRRFIP1;LRRFIP1;LRRFIP1	NM_001137553;NM_004735;NM_001137550;NM_001137552;NM_001137551	Body;Body;Body;Body;Body
cg27619343	0.675827	0.898196	0.222369	cg27619343	37	16	73949738	16	72507239					TRUE
cg06582411	0.510606	0.732979	0.222372	cg06582411	37	7	100229865	7	100067801	TFR2	NM_003227	Body	N_Shore
cg22501243	0.703128	0.925502	0.222374	cg22501243	37	12	122611269	12	121177223	MLXIP	NM_014938	Body			Unclassified_Cell_type_specific
cg06296151	0.665135	0.887591	0.222457	cg06296151	37	3	32522806	3	32497810	CMTM6	NM_017801	3'UTR
cg26246536	0.587069	0.809578	0.222509	cg26246536	37	8	975053	8	962460				N_Shore
cg22982654	0.257443	0.480132	0.222689	cg22982654	37	6	27205325	6	27313304
cg07068956	0.626917	0.849928	0.223011	cg07068956	37	7	100330872	7	100168808	ZAN;ZAN	NM_173059;NM_003386	TSS1500;TSS1500
cg09156155	0.338332	0.561661	0.223329	cg09156155	37	13	27102776	13	26000776					TRUE
cg19302183	0.621058	0.844457	0.223399	cg19302183	37	1	56397400	1	56169988					TRUE
cg11952239	0.667308	0.890716	0.223408	cg11952239	37	6	94432258	6	94488979	TSG1	NR_015362	Body		TRUE
cg18918637	0.65666	0.880315	0.223655	cg18918637	37	1	228607587	1	226674210				S_Shelf
cg17454509	0.596954	0.820677	0.223723	cg17454509	37	12	46308820	12	44595087					TRUE
cg25597177	0.690538	0.914417	0.223879	cg25597177	37	13	22239929	13	21137929				N_Shelf
cg24242384	0.482673	0.706799	0.224126	cg24242384	37	6	32551954	6	32659932	HLA-DRB1	NM_002124	Body	Island
cg22209656	0.609854	0.834532	0.224679	cg22209656	37	3	104972590	3	106455280					TRUE
cg26560068	0.579017	0.803976	0.224959	cg26560068	37	8	7430856	8	7418266	FAM90A7	NM_001136572	Body
ch.2.3260358R	0.252374	0.477419	0.225045	ch.2.3260358R	36	2	159905508	2	159613753	TANC1;TANC1	NM_001145909;NM_033394	5'UTR;5'UTR
cg16662477	0.694476	0.91954	0.225064	cg16662477	37	17	33401430	17	30425543	RFFL	NM_057178	5'UTR		TRUE
cg10166825	0.679635	0.904876	0.22524	cg10166825	37	5	125052595	5	125080494					TRUE
cg03664443	0.675231	0.900496	0.225265	cg03664443	37	18	13916330	18	13906330	MC2R	NM_000529	TSS1500
cg20743435	0.670622	0.895939	0.225317	cg20743435	37	4	156743043	4	156962493					TRUE
cg05453434	0.541806	0.767372	0.225566	cg05453434	37	16	83371223	16	81928724	CDH13	NM_001257	Body		TRUE
cg13917232	0.70005	0.925723	0.225673	cg13917232	37	6	31907392	6	32015371	C2;C2	NM_000063;NM_001145903	Body;Body		TRUE
cg04685060	0.651669	0.877388	0.225719	cg04685060	37	X	30265350	X	30175271	MAGEB1;MAGEB1;MAGEB1;MAGEB1	NM_177404;NM_002363;NM_177415;NM_177404	5'UTR;5'UTR;5'UTR;1stExon	Island
cg13879547	0.454697	0.68046	0.225763	cg13879547	37	9	139358536	9	138478357	SEC16A	NM_014866	Body	N_Shelf
cg03071146	0.635417	0.861446	0.226029	cg03071146	37	2	54010103	2	53863607	LOC100302652;ASB3;ASB3	NM_001164165;NM_145863;NM_016115	Body;5'UTR;5'UTR	N_Shelf
cg22022671	0.670709	0.896783	0.226074	cg22022671	37	5	83253023	5	83288779	EDIL3	NM_005711	Body		TRUE
cg05887630	0.642091	0.868613	0.226522	cg05887630	37	4	8256315	4	8307215
cg06033321	0.661309	0.887856	0.226547	cg06033321	37	1	86011409	1	85783997	DDAH1	NM_001134445	5'UTR		TRUE
ch.10.2595292R	0.223195	0.449755	0.22656	ch.10.2595292R	36	10	122706717	10	122696706				N_Shore
cg14393649	0.630485	0.857143	0.226658	cg14393649	37	X	49178100	X	49065044	GAGE12J	NM_001098406	TSS1500	N_Shore
cg26463699	0.678581	0.905259	0.226677	cg26463699	37	8	1624741	8	1612148	DLGAP2	NM_004745	Body
cg06526761	0.625503	0.852234	0.22673	cg06526761	37	10	5884153	10	5924159				S_Shore
cg26305745	0.339973	0.566766	0.226792	cg26305745	37	2	90108355	2	89745660
cg21785710	0.659954	0.886814	0.226861	cg21785710	37	2	63662027	2	63515531	C2orf86;C2orf86	NM_015910;NM_001042692	Body;Body
cg14327505	0.590103	0.8171	0.226996	cg14327505	37	14	90810928	14	89880681					TRUE
cg23662448	0.391178	0.618192	0.227014	cg23662448	37	12	109797184	12	108281567
cg20996887	0.686462	0.913891	0.227429	cg20996887	37	1	246136645	1	244203268	SMYD3;SMYD3	NM_022743;NM_001167740	Body;Body	N_Shore
cg24705426	0.462745	0.690523	0.227778	cg24705426	37	3	11550659	3	11525659	ATG7;ATG7;ATG7	NM_001136031;NM_001144912;NM_006395	Body;Body;Body		TRUE
cg21165045	0.601558	0.829386	0.227828	cg21165045	37	7	142352951	7	142033939
cg14197156	0.706093	0.933962	0.227869	cg14197156	37	9	139565151	9	138684972	EGFL7;EGFL7	NM_016215;NM_201446	Body;Body	Island
cg22223119	0.530752	0.759007	0.228255	cg22223119	37	13	99095684	13	97893685	FARP1	NM_005766	Body		TRUE
cg11154715	0.7123	0.940848	0.228548	cg11154715	37	12	52292226	12	50578493				N_Shore	TRUE
cg09116618	0.589295	0.817951	0.228656	cg09116618	37	6	81233028	6	81289747					TRUE
cg04144911	0.44	0.668688	0.228688	cg04144911	37	19	51979244	19	56671056	CEACAM18	NM_001080405	TSS1500
cg08756266	0.595638	0.824636	0.228999	cg08756266	37	6	88106569	6	88163288	C6orf164	NR_026784	TSS1500
cg16164092	0.60411	0.833333	0.229224	cg16164092	37	6	31782675	6	31890654	HSPA1L;HSPA1L;HSPA1A	NM_005527;NM_005527;NM_005345	5'UTR;1stExon;TSS1500	N_Shore		Promoter_Associated
cg24074432	0.710682	0.939914	0.229232	cg24074432	37	2	85505567	2	85359078	TCF7L1	NM_031283	Body		TRUE
cg12041100	0.639318	0.868801	0.229483	cg12041100	37	17	38337188	17	35590714	RAPGEFL1	NM_016339	5'UTR	S_Shelf
cg00850058	0.585672	0.815839	0.230167	cg00850058	37	4	14997290	4	14606388
cg21685048	0.486579	0.716931	0.230352	cg21685048	37	2	17771856	2	17635337	VSNL1	NM_003385	5'UTR		TRUE
cg17060263	0.681025	0.911411	0.230386	cg17060263	37	3	42453125	3	42428129	LYZL4	NM_144634	TSS1500
cg15552091	0.633005	0.863765	0.23076	cg15552091	37	2	68974617	2	68828121	ARHGAP25;ARHGAP25	NM_001007231;NM_001166277	Body;Body
cg12349676	0.35423	0.584993	0.230763	cg12349676	37	21	34350934	21	33272804				Island	TRUE
cg13107810	0.570991	0.801818	0.230827	cg13107810	37	1	233531418	1	231598041
cg08076147	0.238024	0.469051	0.231027	cg08076147	37	7	117513825	7	117301061	CTTNBP2	NM_033427	TSS1500	Island
cg04582136	0.723766	0.955608	0.231842	cg04582136	37	3	42233192	3	42208196	TRAK1;TRAK1	NM_001042646;NM_014965	Body;Body		TRUE	Unclassified
cg20939320	0.638821	0.870737	0.231916	cg20939320	37	3	132563279	3	134045969	NCRNA00119	NR_002811	Body		TRUE
cg18545655	0.698448	0.930364	0.231916	cg18545655	37	13	46288165	13	45186166	SPERT	NM_152719	Body	Island
cg26406353	0.570944	0.802915	0.231972	cg26406353	37	20	31985746	20	31449407	CDK5RAP1;CDK5RAP1	NM_016082;NM_016408	5'UTR;5'UTR	N_Shelf
cg05164495	0.67209	0.904092	0.232002	cg05164495	37	16	33948806	16	33856307
cg07544189	0.733438	0.965481	0.232043	cg07544189	37	16	68348695	16	66906196	PRMT7	NM_019023	5'UTR	S_Shelf
cg22802296	0.510606	0.742908	0.232302	cg22802296	37	1	164682021	1	162948645	PBX1	NM_002585	Body		TRUE
cg03922048	0.706078	0.938392	0.232314	cg03922048	37	8	64085098	8	64247652	YTHDF3	NM_152758	Body	S_Shelf
cg07566463	0.652365	0.884967	0.232602	cg07566463	37	8	12426635	8	12471006
cg18579761	0.742533	0.975223	0.23269	cg18579761	37	4	83323585	4	83542609
cg21118689	0.697728	0.930509	0.232782	cg21118689	37	4	151051929	4	151271379	DCLK2;DCLK2	NM_001040261;NM_001040260	Body;Body		TRUE
cg10901867	0.588194	0.821036	0.232842	cg10901867	37	4	2064353	4	2034151	NAT8L	NM_178557	Body	N_Shore
cg27410091	0.540244	0.773105	0.232861	cg27410091	37	8	66711941	8	66874495	PDE7A	NM_002604	Body		TRUE
cg18957721	0.661531	0.894468	0.232937	cg18957721	37	13	99197425	13	97995426	STK24	NM_001032296	Body		TRUE
cg08865458	0.359762	0.592737	0.232975	cg08865458	37	20	36793866	20	36227280	TGM2;TGM2	NM_004613;NM_198951	TSS200;TSS200	Island	TRUE	Unclassified
cg18731202	0.544021	0.777186	0.233164	cg18731202	37	2	70734532	2	70588040	TGFA;TGFA	NM_003236;NM_001099691	Body;Body		TRUE
cg17491304	0.560338	0.793568	0.23323	cg17491304	37	11	130476866	11	129982076					TRUE
cg26643476	0.67378	0.907032	0.233253	cg26643476	37	12	123215684	12	121781637	GPR81	NM_032554	TSS1500
cg07801448	0.666327	0.899693	0.233366	cg07801448	37	4	40356774	4	40051531	CHRNA9	NM_017581	3'UTR		TRUE
cg20419181	0.141542	0.375108	0.233566	cg20419181	37	4	38063874	4	37740269	TBC1D1	NM_015173	Body		TRUE	Gene_Associated
cg26363272	0.631689	0.86558	0.233891	cg26363272	37	2	240904871	2	240553544	NDUFA10	NM_004544	Body
cg05603680	0.251163	0.485232	0.234069	cg05603680	37	3	55033444	3	55008484	CACNA2D3	NM_018398	Body		TRUE
cg00595828	0.584443	0.818653	0.234209	cg00595828	37	4	141658925	4	141878375	TBC1D9	NM_015130	Body		TRUE
cg00730266	0.247012	0.481605	0.234593	cg00730266	37	7	94537716	7	94375652	PPP1R9A;PPP1R9A;PPP1R9A;PPP1R9A;PPP1R9A	NM_001166161;NM_001166160;NM_001166163;NM_001166162;NM_017650	TSS1500;5'UTR;TSS1500;TSS1500;5'UTR	S_Shore
cg08699575	0.664474	0.899101	0.234627	cg08699575	37	8	333325	8	323325
cg00465883	0.651779	0.886571	0.234791	cg00465883	37	15	25349082	15	22900175	SNORD116-28	NR_003361	TSS1500
cg16253870	0.630548	0.86558	0.235033	cg16253870	37	12	68959172	12	67245439					TRUE
cg14770102	0.433477	0.668697	0.23522	cg14770102	37	11	58984446	11	58741022
cg05393741	0.462687	0.698606	0.23592	cg05393741	37	12	106985000	12	105509130	RFX4	NM_213594	Body	S_Shelf
cg00732845	0.609756	0.845826	0.23607	cg00732845	37	7	155244727	7	154937488				N_Shore
cg18833788	0.448008	0.684149	0.236141	cg18833788	37	19	48994043	19	53685855	LMTK3	NM_001080434	Body	N_Shelf		Unclassified
cg18422853	0.639701	0.876011	0.236309	cg18422853	37	15	30049198	15	27836490	TJP1;TJP1	NM_175610;NM_003257	Body;Body		TRUE
cg07817648	0.681769	0.918335	0.236567	cg07817648	37	10	79422355	10	79092361
cg17340170	0.593085	0.829716	0.236631	cg17340170	37	19	21686146	19	21477986				N_Shelf
cg05516773	0.669031	0.905894	0.236863	cg05516773	37	8	37643811	8	37762969
cg06390077	0.676592	0.913709	0.237118	cg06390077	37	7	141385142	7	141031611	KIAA1147	NM_001080392	Body
cg16866941	0.641909	0.879155	0.237246	cg16866941	37	22	38601325	22	36931271	MAFF;MAFF;MAFF;MAFF	NM_001161573;NM_001161572;NM_012323;NM_001161574	5'UTR;5'UTR;5'UTR;5'UTR	S_Shelf		Unclassified_Cell_type_specific
cg24687055	0.672273	0.909781	0.237508	cg24687055	37	6	7427331	6	7372330
cg07229212	0.216216	0.453995	0.237779	cg07229212	37	8	11056726	8	11094136	XKR6	NM_173683	Body	N_Shore		Unclassified_Cell_type_specific
cg15325161	0.703237	0.941063	0.237825	cg15325161	37	3	23894233	3	23869237	UBE2E1;UBE2E1	NM_003341;NM_182666	Body;Body
cg15475727	0.690217	0.928051	0.237834	cg15475727	37	22	47396384	22	45775048	TBC1D22A	NM_014346	Body
cg16083651	0.535758	0.773624	0.237867	cg16083651	37	X	71354944	X	71271669	NHSL2	NM_001013627	Body	S_Shelf
cg17361070	0.586877	0.825064	0.238186	cg17361070	37	6	32282950	6	32390928	C6orf10	NM_006781	Body
cg18070504	0.544282	0.782524	0.238242	cg18070504	37	3	11187858	3	11162858	HRH1	NM_001098213	5'UTR		TRUE
cg14280905	0.495984	0.73445	0.238466	cg14280905	37	9	136424187	9	135414008	ADAMTSL2;ADAMTSL2	NM_014694;NM_001145320	Body;Body	N_Shore
cg21028981	0.617888	0.856608	0.23872	cg21028981	37	3	192465728	3	193948422					TRUE
cg17951408	0.635405	0.874594	0.239189	cg17951408	37	7	123092768	7	122880004	IQUB	NM_178827	3'UTR
cg16904430	0.548692	0.788226	0.239534	cg16904430	37	13	96224250	13	95022251	CLDN10;CLDN10;CLDN10	NM_006984;NM_182848;NM_001160100	Body;Body;Body		TRUE
cg18061543	0.660396	0.900103	0.239707	cg18061543	37	17	80864463	17	78457752	TBCD	NM_005993	Body	S_Shore
cg14876463	0.677308	0.917101	0.239793	cg14876463	37	7	139989127	7	139635596				N_Shelf
cg23194433	0.618324	0.858346	0.240022	cg23194433	37	19	7087578	19	7038578	ZNF557;ZNF557;ZNF557	NM_024341;NM_001044387;NM_001044388	3'UTR;3'UTR;3'UTR
cg23094648	0.66781	0.907942	0.240133	cg23094648	37	1	35494855	1	35267442	ZMYM6	NM_007167	Body	N_Shelf
cg00184240	0.661757	0.901989	0.240232	cg00184240	37	12	122666660	12	121232613	LRRC43;LRRC43	NM_152759;NM_001098519	5'UTR;TSS1500	N_Shore
cg11844660	0.136036	0.376731	0.240695	cg11844660	37	13	99853889	13	98651890	UBAC2;UBAC2;UBAC2	NM_001144072;NM_177967;NR_026644	Body;Body;Body	S_Shore		Promoter_Associated
cg18783047	0.714628	0.955822	0.241194	cg18783047	37	19	10420351	19	10281351	ZGLP1	NM_001103167	TSS200	Island
cg14259755	0.600848	0.842084	0.241236	cg14259755	37	9	132696001	9	131735822	FNBP1	NM_015033	Body		TRUE
cg00956134	0.618069	0.859344	0.241275	cg00956134	37	7	43942533	7	43909058	URGCP;URGCP;URGCP	NM_001077664;NM_001077663;NM_017920	5'UTR;Body;Body	N_Shelf
cg10013645	0.624587	0.866276	0.241689	cg10013645	37	10	35501529	10	35541535	CREM;CREM;CREM;CREM;CREM;CREM;CREM;CREM;CREM;CREM;CREM;CREM;CREM;CREM;CREM;CREM;CREM;CREM;CREM;CREM	NM_182771;NM_183011;NM_181571;NM_182770;NM_183013;NM_182720;NM_182718;NM_182723;NM_182769;NM_182853;NM_182850;NM_183012;NM_183060;NM_182719;NM_182725;NM_182717;NM_182724;NM_182772;NM_182722;NM_182721	3'UTR;3'UTR;3'UTR;3'UTR;3'UTR;3'UTR;3'UTR;3'UTR;3'UTR;3'UTR;3'UTR;3'UTR;3'UTR;3'UTR;3'UTR;3'UTR;3'UTR;3'UTR;3'UTR;3'UTR	N_Shelf
cg09290177	0.671977	0.913736	0.241759	cg09290177	37	2	120559075	2	120275545	PTPN4	NM_002830	5'UTR		TRUE
cg12816198	0.613781	0.855597	0.241816	cg12816198	37	7	128577593	7	128364829	IRF5;IRF5;IRF5;IRF5;IRF5;IRF5	NM_001098630;NM_032643;NM_001098629;NM_001098628;NM_001098631;NM_002200	TSS1500;TSS1500;TSS1500;TSS1500;TSS1500;TSS1500	N_Shore		Promoter_Associated
cg26475999	0.578125	0.820175	0.24205	cg26475999	37	Y	9344960	Y	9954960	TSPY4	NM_001164471	Body	Island
cg07938847	0.400566	0.642961	0.242395	cg07938847	37	4	82126349	4	82345373	PRKG2	NM_006259	TSS200
cg03257293	0.46159	0.704098	0.242508	cg03257293	37	1	226927663	1	224994286	ITPKB	NM_002221	TSS1500	S_Shore		Promoter_Associated
cg07951151	0.640161	0.882839	0.242678	cg07951151	37	2	10155062	2	10072513
cg17517709	0.637197	0.879978	0.242781	cg17517709	37	10	18999145	10	19039151				Island
cg05653055	0.484133	0.727085	0.242952	cg05653055	37	17	20841843	17	20782435
cg02539829	0.625	0.868167	0.243167	cg02539829	37	2	197787991	2	197496236	PGAP1	NM_024989	Body	N_Shelf
cg25222324	0.673684	0.916969	0.243285	cg25222324	37	4	87797676	4	88016700	C4orf36	NM_144645	3'UTR
cg12452608	0.645091	0.888399	0.243309	cg12452608	37	3	61179015	3	61154055	FHIT;FHIT	NM_001166243;NM_002012	5'UTR;5'UTR		TRUE
cg23968551	0.646358	0.88971	0.243353	cg23968551	37	4	40818214	4	40512971	APBB2;APBB2;APBB2;APBB2;APBB2;APBB2;APBB2	NM_004307;NM_001166052;NM_001166053;NM_001166050;NM_173075;NM_001166051;NM_001166054	Body;Body;Body;Body;Body;Body;Body
cg10259761	0.658416	0.90184	0.243425	cg10259761	37	10	35675095	10	35715101	CCNY;CCNY	NM_145012;NM_181698	Body;5'UTR		TRUE
cg04838225	0.680574	0.924356	0.243782	cg04838225	37	13	26628537	13	25526537				S_Shelf
cg21256200	0.543947	0.788235	0.244288	cg21256200	37	22	24374012	22	22704012	LOC391322	NM_001144931	3'UTR	S_Shore
cg05276972	0.619378	0.863772	0.244394	cg05276972	37	11	130482015	11	129987225					TRUE
cg10705717	0.64817	0.89258	0.24441	cg10705717	37	19	56615103	19	61306915	ZNF787	NM_001002836	5'UTR	Island
cg05725686	0.62568	0.870156	0.244477	cg05725686	37	16	58553352	16	57110853	SETD6;SETD6	NM_001160305;NM_024860	3'UTR;3'UTR	S_Shelf
cg20704819	0.567456	0.811947	0.244491	cg20704819	37	6	29585653	6	29693632	GABBR1;GABBR1;GABBR1	NM_021904;NM_021903;NM_001470	Body;Body;Body
cg15707491	0.670358	0.915044	0.244686	cg15707491	37	12	23738923	12	23630190	SOX5;SOX5;SOX5	NM_178010;NM_152989;NM_006940	TSS1500;Body;Body		TRUE
cg27115990	0.637955	0.882721	0.244766	cg27115990	37	2	174980524	2	174688770	OLA1;OLA1	NM_013341;NM_001011708	Body;Body		TRUE
cg03470646	0.577101	0.822317	0.245216	cg03470646	37	8	9402640	8	9440050					TRUE
cg07089660	0.466448	0.71174	0.245292	cg07089660	37	8	6795162	8	6782572	DEFA4	NM_001925	5'UTR
cg01033360	0.670898	0.916929	0.24603	cg01033360	37	19	3381432	19	3332432	NFIC;NFIC	NM_005597;NM_205843	Body;Body	N_Shore
cg13986117	0.581828	0.828054	0.246226	cg13986117	37	9	114506089	9	113545910	C9orf84;C9orf84	NM_001080551;NM_173521	Body;Body		TRUE
cg09827353	0.665489	0.911929	0.246439	cg09827353	37	2	221584360	2	221292604					TRUE
cg09343819	0.477241	0.723748	0.246507	cg09343819	37	19	9202847	19	9063847	OR1M1	NM_001004456	TSS1500	N_Shore
cg01971258	0.351109	0.597653	0.246544	cg01971258	37	3	22732998	3	22708002					TRUE
ch.8.842844F	0.165174	0.412104	0.24693	ch.8.842844F	36	8	35478712	8	35598253	UNC5D	NM_080872	Body
cg09526215	0.590498	0.837524	0.247026	cg09526215	37	5	69483768	5	69519524	LOC653391;LOC100170939	NR_029426;NR_024054	Body;Body
cg19199204	0.472222	0.719536	0.247314	cg19199204	37	6	29944130	6	30052109	HCG9	NR_028032	Body	N_Shore		Unclassified
cg19268720	0.640808	0.888393	0.247585	cg19268720	37	11	48038449	11	47995025	PTPRJ;PTPRJ	NM_002843;NM_001098503	Body;Body		TRUE
cg05019016	0.502825	0.75045	0.247626	cg05019016	37	14	57853771	14	56923524				N_Shelf
cg00583426	0.446498	0.694301	0.247803	cg00583426	37	16	1209990	16	1149991	CACNA1H;CACNA1H	NM_021098;NM_001005407	Body;Body	Island	TRUE	Unclassified_Cell_type_specific
cg05036991	0.60391	0.852718	0.248808	cg05036991	37	2	155089854	2	154798100	GALNT13	NM_052917	Body
cg10819807	0.481294	0.730577	0.249284	cg10819807	37	6	29461549	6	29569528
cg14389169	0.657601	0.907377	0.249777	cg14389169	37	4	130016074	4	130235524	SCLT1;C4orf33;C4orf33	NM_144643;NM_173487;NM_001099783	TSS1500;5'UTR;TSS1500	S_Shore
cg02664327	0.63521	0.885468	0.250258	cg02664327	37	6	25899832	6	26007811					TRUE
cg09718037	0.711831	0.962125	0.250294	cg09718037	37	12	117042854	12	115527237
cg06728055	0.593271	0.843623	0.250352	cg06728055	37	3	149294286	3	150776976	WWTR1;WWTR1;WWTR1	NM_015472;NM_001168278;NM_001168280	Body;Body;Body		TRUE
cg20381404	0.395498	0.64613	0.250631	cg20381404	37	5	34008215	5	34043972	AMACR;AMACR;AMACR;AMACR;AMACR;AMACR;AMACR;AMACR;AMACR;AMACR;AMACR;AMACR	NM_001167597;NM_203382;NM_001167598;NM_001167597;NM_001167595;NM_014324;NM_001167598;NM_001167595;NM_203382;NM_001167596;NM_014324;NM_001167596	5'UTR;1stExon;5'UTR;1stExon;1stExon;5'UTR;1stExon;5'UTR;5'UTR;1stExon;1stExon;5'UTR	S_Shore		Promoter_Associated
cg10907148	0.681038	0.932071	0.251033	cg10907148	37	17	72948349	17	70459944	C17orf28	NM_030630	Body
cg18260919	0.704545	0.956092	0.251547	cg18260919	37	3	135869103	3	137351793	MSL2;MSL2	NM_001145417;NM_018133	3'UTR;3'UTR		TRUE
cg10537848	0.629023	0.880605	0.251583	cg10537848	37	7	1812368	7	1778894				S_Shelf
cg07093060	0.214286	0.466552	0.252267	cg07093060	37	3	174092757	3	175575451				N_Shelf
cg20246907	0.624071	0.876788	0.252718	cg20246907	37	13	99316927	13	98114928					TRUE
cg03486669	0.650888	0.90363	0.252742	cg03486669	37	22	16407026	22	14787026				S_Shelf
cg23426792	0.658798	0.911645	0.252847	cg23426792	37	5	162946055	5	162878633	MAT2B;MAT2B	NM_013283;NM_182796	3'UTR;3'UTR
ch.18.189560F	0.297189	0.550058	0.252869	ch.18.189560F	36	18	8638712	18	8628711	RAB12	NM_001025300	3'UTR
cg05122803	0.613914	0.866863	0.252949	cg05122803	37	16	65932917	16	64490418					TRUE
cg22725940	0.490826	0.744229	0.253403	cg22725940	37	X	119028450	X	118912478	AKAP14;AKAP14;AKAP14	NM_178813;NM_001008534;NM_001008535	TSS1500;TSS1500;TSS1500
cg00426486	0.49658	0.75	0.25342	cg00426486	37	16	86605100	16	85162601				S_Shelf
cg22376827	0.146514	0.4	0.253486	cg22376827	37	3	135913335	3	137396025	MSL2;MSL2	NM_001145417;NM_018133	TSS200;Body	N_Shore
cg18432954	0.580305	0.833841	0.253536	cg18432954	37	10	134887227	10	134737217				N_Shelf
cg19404190	0.561041	0.815461	0.25442	cg19404190	37	5	147692173	5	147672366	SPINK7	NM_032566	Body
cg17568255	0.692966	0.947758	0.254792	cg17568255	37	2	9614530	2	9531981	IAH1	NM_001039613	TSS200	Island		Promoter_Associated
cg14391382	0.541694	0.79664	0.254946	cg14391382	37	7	866102	7	832628	UNC84A;UNC84A	NM_001130965;NM_025154	5'UTR;5'UTR	S_Shelf
cg15046712	0.679798	0.935143	0.255345	cg15046712	37	4	3691397	4	3661195
cg25944965	0.554305	0.81002	0.255715	cg25944965	37	19	21264371	19	21056211	ZNF714	NM_182515	TSS1500	N_Shore
cg21570180	0.672575	0.929201	0.256626	cg21570180	37	3	130742015	3	132224705	ASTE1	NM_014065	Body	N_Shelf
cg14354631	0.652569	0.91033	0.25776	cg14354631	37	7	158058752	7	157751513	PTPRN2;PTPRN2;PTPRN2	NM_002847;NM_130842;NM_130843	Body;Body;Body	Island
cg02842338	0.5625	0.820682	0.258182	cg02842338	37	19	58296010	19	62987822				N_Shore
cg19110982	0.607779	0.866089	0.25831	cg19110982	37	20	32662344	20	32126005	RALY;RALY	NM_016732;NM_007367	Body;Body		TRUE	Gene_Associated_Cell_type_specific
cg08921682	0.157543	0.415929	0.258386	cg08921682	37	Y	6891543	Y	6951543	TBL1Y;TBL1Y;TBL1Y	NM_134259;NM_033284;NM_134258	5'UTR;5'UTR;5'UTR
cg07352158	0.6372	0.895909	0.258709	cg07352158	37	3	120170646	3	121653336	FSTL1	NM_007085	TSS1500	S_Shore
cg25283336	0.49713	0.756131	0.259001	cg25283336	37	6	33033484	6	33141462	HLA-DPA1	NM_033554	3'UTR
cg02555585	0.602253	0.861443	0.25919	cg02555585	37	20	42090853	20	41524267	SFRS6	NM_006275	3'UTR	S_Shelf
cg06299192	0.585987	0.845399	0.259412	cg06299192	37	3	154513392	3	155996086					TRUE
cg16064925	0.569541	0.829069	0.259529	cg16064925	37	18	72200626	18	70351606	CNDP1	NM_032649	TSS1500
cg22974630	0.635475	0.895072	0.259597	cg22974630	37	12	54733883	12	53020150	COPZ1	NM_016057	Body
cg13186010	0.565639	0.825309	0.259671	cg13186010	37	11	100561626	11	100066836	FLJ32810	NM_152432	Body	S_Shelf
cg09500807	0.637534	0.897284	0.25975	cg09500807	37	10	60047571	10	59717577	CISD1	NM_018464	3'UTR
cg16426779	0.603968	0.864005	0.260037	cg16426779	37	16	19127208	16	19034709	ITPRIPL2;ITPRIPL2	NM_001034841;NR_028028	1stExon;Body	Island	TRUE
cg16717723	0.656843	0.917112	0.260269	cg16717723	37	8	2172215	8	2159622
cg13060236	0.332943	0.593244	0.2603	cg13060236	37	1	57490967	1	57263555	DAB1	NM_021080	Body		TRUE
cg21222187	0.526801	0.787129	0.260328	cg21222187	37	13	32258346	13	31156346					TRUE
cg03421510	0.150758	0.41119	0.260432	cg03421510	37	12	92304897	12	90829028					TRUE	Unclassified_Cell_type_specific
cg01536222	0.675846	0.936364	0.260518	cg01536222	37	8	10871191	8	10908601	XKR6	NM_173683	Body	N_Shelf
cg16226642	0.456997	0.717676	0.260679	cg16226642	37	11	7847876	11	7804452	OR5P3	NM_153445	TSS1500
cg00940287	0.529124	0.789907	0.260783	cg00940287	37	X	139332755	X	139160421					TRUE
cg25878063	0.578767	0.839744	0.260976	cg25878063	37	2	159736477	2	159444723
cg27329737	0.646302	0.907586	0.261284	cg27329737	37	3	150930072	3	152412762	P2RY14;MED12L;P2RY14	NM_001081455;NM_053002;NM_014879	3'UTR;Body;3'UTR
cg07510282	0.576818	0.83815	0.261332	cg07510282	37	10	90644018	10	90633998	STAMBPL1	NM_020799	5'UTR	S_Shelf
cg17103155	0.620214	0.881608	0.261394	cg17103155	37	4	4840199	4	4891100					TRUE
cg12415761	0.618204	0.879616	0.261413	cg12415761	37	2	210179077	2	209887322					TRUE
ch.14.1168716F	0.216366	0.478134	0.261768	ch.14.1168716F	36	14	77543787	14	76613539
cg23413567	0.4327	0.69457	0.261871	cg23413567	37	13	41223175	13	40121175	FOXO1	NM_002015	Body		TRUE
cg18733567	0.576642	0.838524	0.261881	cg18733567	37	4	1614142	4	1584101
cg15128275	0.591837	0.853868	0.262031	cg15128275	37	3	111916760	3	113399450	SLC9A10	NM_183061	Body		TRUE
cg17051591	0.674411	0.937087	0.262676	cg17051591	37	15	42340853	15	40128145					TRUE
cg04615668	0.633929	0.897933	0.264005	cg04615668	37	5	10991866	5	11044866	CTNND2	NM_001332	Body
cg12982259	0.597213	0.861227	0.264015	cg12982259	37	7	141463881	7	141110350	TAS2R3	NM_016943	TSS200
cg10808198	0.595756	0.860258	0.264502	cg10808198	37	19	50147644	19	54839456	SCAF1	NM_021228	5'UTR	S_Shore
cg01274916	0.648422	0.913106	0.264684	cg01274916	37	22	31062286	22	29392286	DUSP18	NM_152511	5'UTR	N_Shore
cg08341710	0.509395	0.774262	0.264867	cg08341710	37	12	109013076	12	107537205					TRUE
cg17854981	0.693935	0.959274	0.265339	cg17854981	37	7	100274472	7	100112408	GNB2	NM_005273	Body	S_Shore
cg06595154	0.518168	0.784192	0.266023	cg06595154	37	11	10716164	11	10672740	MRVI1;MRVI1;MRVI1	NM_001100167;NM_130385;NM_001100163	TSS1500;TSS1500;TSS1500
cg22661247	0.57281	0.838896	0.266086	cg22661247	37	7	99997477	7	99835413	PILRA;PILRA;PILRA	NM_013439;NM_178272;NM_178273	Body;Body;3'UTR
cg15907134	0.620287	0.886449	0.266162	cg15907134	37	17	96086	17	96086	RPH3AL	NM_006987	Body	N_Shelf
cg03153115	0.676053	0.942444	0.26639	cg03153115	37	19	2604559	19	2555559	GNG7	NM_052847	5'UTR	N_Shelf
cg07562175	0.633372	0.899779	0.266408	cg07562175	37	12	133028905	12	131538978
cg25355599	0.626104	0.892545	0.26644	cg25355599	37	3	117455566	3	118938256					TRUE
cg00877553	0.545682	0.812802	0.26712	cg00877553	37	8	29923556	8	30043098	TMEM66	NM_016127	Body
cg11680826	0.505626	0.772761	0.267135	cg11680826	37	19	37710094	19	42401934				S_Shore
cg02209998	0.610144	0.877342	0.267199	cg02209998	37	8	649235	8	639235	ERICH1	NM_207332	Body	N_Shore
cg16457489	0.624846	0.892506	0.26766	cg16457489	37	5	126345185	5	126373084	2011-03-03	NM_178450	5'UTR		TRUE
cg23732024	0.652852	0.920926	0.268075	cg23732024	37	8	74903801	8	75066355	LY96	NM_015364	Body		TRUE
cg10132704	0.522767	0.790915	0.268148	cg10132704	37	7	152749323	7	152380256
cg13942627	0.611341	0.880082	0.268741	cg13942627	37	1	64283520	1	64056108	ROR1;ROR1	NM_005012;NM_001083592	Body;Body		TRUE
cg03858121	0.632688	0.901464	0.268776	cg03858121	37	22	49698418	22	48084422				Island
cg12536028	0.533258	0.802404	0.269146	cg12536028	37	4	187148688	4	187385682	KLKB1;KLKB1	NM_000892;NM_000892	1stExon;5'UTR		TRUE
cg06832791	0.536605	0.80597	0.269365	cg06832791	37	8	28256782	8	28312701				N_Shelf
cg26987604	0.377174	0.647872	0.270698	cg26987604	37	6	29696647	6	29804626	LOC285830;LOC285830	NR_026972;NR_026973	Body;Body
cg24460817	0.605524	0.876311	0.270786	cg24460817	37	1	247876088	1	245942711	OR6F1	NM_001005286	TSS200
cg20862283	0.623328	0.894373	0.271045	cg20862283	37	2	156838956	2	156547202					TRUE
cg11239826	0.343986	0.615032	0.271047	cg11239826	37	5	180685955	5	180618561	TRIM52	NM_032765	Body	N_Shelf
cg12891810	0.5949	0.86619	0.271291	cg12891810	37	17	61894297	17	59248029	DDX42;DDX42	NM_203499;NM_007372	Body;Body		TRUE
cg13169968	0.298658	0.570893	0.272235	cg13169968	37	1	230563798	1	228630421				S_Shore	TRUE
cg02659803	0.659848	0.932099	0.272251	cg02659803	37	13	23409813	13	22307813				N_Shelf
cg07607066	0.659119	0.931459	0.27234	cg07607066	37	22	47457123	22	45835787	TBC1D22A	NM_014346	Body	Island
cg21247948	0.572197	0.844543	0.272346	cg21247948	37	2	37545307	2	37398811	PRKD3	NM_005813	TSS1500		TRUE
cg26566358	0.515976	0.788604	0.272629	cg26566358	37	8	89856205	8	89925321					TRUE
cg13395646	0.634966	0.908434	0.273467	cg13395646	37	4	1353034	4	1343034	KIAA1530	NM_020894	Body
cg23247185	0.641905	0.91553	0.273625	cg23247185	37	3	14530356	3	14505360	SLC6A6;SLC6A6	NM_003043;NM_001134367	3'UTR;3'UTR		TRUE
cg04229820	0.594123	0.867959	0.273836	cg04229820	37	1	192604828	1	190871451	RGS13;RGS13	NM_002927;NM_144766	TSS1500;TSS1500
cg22707393	0.57476	0.848943	0.274182	cg22707393	37	2	47115827	2	46969331					TRUE	Unclassified
cg08860443	0.636206	0.910428	0.274222	cg08860443	37	6	128508152	6	128549845	PTPRK;PTPRK	NM_002844;NM_001135648	Body;Body		TRUE
cg21035142	0.301114	0.57572	0.274607	cg21035142	37	7	151136940	7	150767873	CRYGN	NM_144727	Body	Island	TRUE	Unclassified_Cell_type_specific
cg19061310	0.37094	0.646204	0.275263	cg19061310	37	11	3438606	11	3395182				S_Shelf
cg22644450	0.587714	0.863248	0.275534	cg22644450	37	2	114790476	2	114506946					TRUE
cg27054887	0.492986	0.768531	0.275545	cg27054887	37	16	67276940	16	65834441	FHOD1	NM_013241	Body	N_Shelf
cg11296782	0.568916	0.846684	0.277768	cg11296782	37	2	190688351	2	190396596	PMS1;PMS1;PMS1	NM_001128143;NM_001128144;NM_000534	Body;Body;Body	S_Shore
cg17560624	0.539776	0.81758	0.277804	cg17560624	37	3	13610359	3	13585359	FBLN2;FBLN2;FBLN2;FBLN2	NM_001165035;NM_001004019;NM_001165035;NM_001998	1stExon;5'UTR;5'UTR;5'UTR	N_Shore
cg03606333	0.514653	0.792758	0.278105	cg03606333	37	10	32523007	10	32563013
cg14441491	0.532053	0.810301	0.278248	cg14441491	37	7	73280151	7	72918087	WBSCR28	NM_182504	Body			Unclassified_Cell_type_specific
cg01566282	0.532117	0.810634	0.278517	cg01566282	37	19	53794975	19	58486787	BIRC8	NM_033341	TSS200	S_Shore
cg25349955	0.605454	0.884458	0.279004	cg25349955	37	2	1415911	2	1394918	TPO;TPO	NM_175719;NM_000547	TSS1500;TSS1500
cg19420482	0.633094	0.912128	0.279034	cg19420482	37	3	135709513	3	137192203	PPP2R3A	NM_002718	5'UTR		TRUE
ch.1.173213985R	0.0364322	0.31573	0.279298	ch.1.173213985R	36	1	174947362	1	173213985
cg13029429	0.572977	0.852846	0.279869	cg13029429	37	14	94500569	14	93570322	OTUB2	NM_023112	Body		TRUE
cg23972785	0.537855	0.818359	0.280504	cg23972785	37	8	11611189	8	11648598	GATA4	NM_002052	Body	S_Shelf
cg24170212	0.30198	0.582579	0.280599	cg24170212	37	14	46358139	14	45427889
cg13034868	0.661854	0.943524	0.281669	cg13034868	37	14	93801993	14	92871746	KIAA1409	NM_020818	5'UTR	S_Shelf
cg09811926	0.594844	0.877049	0.282205	cg09811926	37	10	38739506	10	38779512	LOC399744	NR_024497	Body	Island
cg22534759	0.461841	0.744641	0.2828	cg22534759	37	10	32403029	10	32443035				S_Shelf
cg25060765	0.626225	0.909179	0.282954	cg25060765	37	6	7680990	6	7625989					TRUE
cg19607320	0.564729	0.848033	0.283304	cg19607320	37	19	50412816	19	55104628	NUP62;NUP62;IL4I1;NUP62;NUP62	NM_012346;NM_016553;NM_172374;NM_153719;NM_153718	Body;Body;5'UTR;Body;Body
cg06209383	0.578505	0.862125	0.283621	cg06209383	37	7	157292888	7	156985649				N_Shore
cg24963077	0.556714	0.840533	0.283819	cg24963077	37	14	24017882	14	23087722				N_Shelf	TRUE	Unclassified_Cell_type_specific
cg05257898	0.196375	0.480769	0.284395	cg05257898	37	X	119078173	X	118962201	NKAP	NM_024528	TSS1500	S_Shore
cg12751354	0.507906	0.793186	0.28528	cg12751354	37	20	52770785	20	52204192	CYP24A1;CYP24A1	NM_001128915;NM_000782	3'UTR;3'UTR
cg18424841	0.656938	0.942377	0.28544	cg18424841	37	20	61315444	20	60785889				Island
cg01316857	0.618188	0.90451	0.286322	cg01316857	37	19	48685724	19	53377536				Island
cg04516351	0.517986	0.804679	0.286693	cg04516351	37	5	52840093	5	52875850					TRUE
cg07737175	0.503262	0.790558	0.287296	cg07737175	37	13	112770897	13	111818898
cg15427040	0.503384	0.792453	0.289069	cg15427040	37	19	39696134	19	44387974	SYCN	NM_001080468	TSS1500	S_Shore
cg17720150	0.640966	0.930578	0.289611	cg17720150	37	15	25342118	15	22893211	SNORD116-25	NR_003339	TSS1500
cg25909854	0.6158	0.905707	0.289907	cg25909854	37	13	24408100	13	23306100	MIPEP	NM_005932	Body
cg13702087	0.556458	0.846487	0.29003	cg13702087	37	4	22520573	4	22129671				S_Shelf
cg26074575	0.484412	0.774621	0.290209	cg26074575	37	3	171764199	3	173246893	FNDC3B;FNDC3B	NM_022763;NM_001135095	5'UTR;5'UTR		TRUE
cg15544637	0.505024	0.795493	0.290469	cg15544637	37	10	89513069	10	89503049	ATAD1	NM_032810	3'UTR
cg04850286	0.50084	0.792009	0.291169	cg04850286	37	10	81895943	10	81885923	PLAC9	NM_001012973	Body	S_Shelf
cg18277815	0.427515	0.719101	0.291586	cg18277815	37	4	6643729	4	6694630	MRFAP1	NM_033296	3'UTR	S_Shore
cg12271800	0.623696	0.91555	0.291854	cg12271800	37	19	59028764	19	63720576	ZBTB45	NM_032792	Body	Island		Unclassified_Cell_type_specific
cg00248861	0.461538	0.754237	0.292699	cg00248861	37	4	1986542	4	1956340	WHSC2	NM_005663	Body	N_Shore
cg18877734	0.574981	0.867816	0.292835	cg18877734	37	X	15621084	X	15531005	ACE2	NM_021804	TSS1500
cg08627768	0.519349	0.812804	0.293454	cg08627768	37	10	11511100	10	11551106	USP6NL;USP6NL	NM_001080491;NM_014688	Body;Body		TRUE
cg22028036	0.570449	0.864787	0.294338	cg22028036	37	7	97838663	7	97676599	LMTK2	NM_014916	3'UTR	N_Shore
cg16875108	0.62027	0.914858	0.294588	cg16875108	37	3	8932184	3	8907184	RAD18	NM_020165	Body		TRUE
cg20817228	0.554737	0.850373	0.295635	cg20817228	37	1	149614778	1	147881402	LOC728855	NR_024510	Body	N_Shore
cg24494262	0.519458	0.815217	0.29576	cg24494262	37	4	155339844	4	155559294	DCHS2	NM_001142552	Body	S_Shore
cg07679038	0.230032	0.526193	0.296161	cg07679038	37	20	36793851	20	36227265	TGM2;TGM2	NM_004613;NM_198951	TSS200;TSS200	Island	TRUE	Unclassified
cg08210468	0.355049	0.65247	0.297421	cg08210468	37	2	62535081	2	62388585					TRUE
cg10502957	0.331671	0.629181	0.29751	cg10502957	37	12	123757070	12	122323023	CDK2AP1	NM_004642	TSS1500	S_Shore
cg04037372	0.531656	0.829453	0.297797	cg04037372	37	11	485437	11	475437	PTDSS2	NM_030783	Body	Island
cg01567615	0.594284	0.892152	0.297868	cg01567615	37	13	114808107	13	113826209	RASA3	NM_007368	Body	S_Shore
cg03132727	0.574863	0.873239	0.298377	cg03132727	37	1	180967813	1	179234436	STX6	NM_005819	Body		TRUE
cg03091027	0.395381	0.693892	0.298511	cg03091027	37	6	28832496	6	28940475				S_Shore
cg00543493	0.443052	0.741706	0.298654	cg00543493	37	Y	9342875	Y	9952875	TSPY4	NM_001164471	Body	N_Shore
cg01125563	0.492308	0.792173	0.299865	cg01125563	37	4	768644	4	758644
cg01523027	0.551075	0.851407	0.300331	cg01523027	37	19	12508210	19	12369210	ZNF799	NM_001080821	Body	N_Shelf
cg24631784	0.616293	0.917724	0.301431	cg24631784	37	8	122368294	8	122437475					TRUE
cg04578397	0.515135	0.819937	0.304802	cg04578397	37	16	56650508	16	55208009	MT1L	NR_001447	TSS1500	N_Shore
cg23878490	0.59751	0.902992	0.305481	cg23878490	37	14	62265250	14	61335003					TRUE
cg16521032	0.656279	0.962144	0.305865	cg16521032	37	12	57587714	12	55873981	MIR1228;LRP1	NR_031597;NM_002332	TSS1500;Body
cg17062305	0.468736	0.77494	0.306203	cg17062305	37	12	129127997	12	127693950	TMEM132C	NM_001136103	Body
cg10840615	0.451039	0.757983	0.306945	cg10840615	37	4	22148230	4	21757328
cg10971134	0.616787	0.923754	0.306967	cg10971134	37	1	56877429	1	56650017					TRUE
cg05316006	0.51551	0.823023	0.307512	cg05316006	37	10	114879619	10	114869609	TCF7L2;TCF7L2;TCF7L2;TCF7L2;TCF7L2;TCF7L2	NM_001146284;NM_001146285;NM_030756;NM_001146274;NM_001146286;NM_001146283	Body;Body;Body;Body;Body;Body
cg07615236	0.330402	0.638003	0.307601	cg07615236	37	19	41208803	19	45900643	ADCK4;ADCK4	NM_001142555;NM_024876	Body;Body			Gene_Associated_Cell_type_specific
cg22304543	0.612158	0.921219	0.309062	cg22304543	37	8	82530924	8	82693479
cg12792086	0.630462	0.939727	0.309265	cg12792086	37	4	789505	4	779505	CPLX1	NM_006651	Body	Island		Unclassified_Cell_type_specific
cg03054529	0.579491	0.888836	0.309345	cg03054529	37	7	30029938	7	29996463	SCRN1;SCRN1;SCRN1;SCRN1	NM_001145513;NM_014766;NM_001145514;NM_001145515	TSS1500;TSS1500;TSS200;TSS1500	S_Shore
cg01820463	0.54912	0.858524	0.309404	cg01820463	37	2	27616144	2	27469648	FTHL3;PPM1G;PPM1G	NR_002201;NM_002707;NM_177983	Body;Body;Body	N_Shore
cg09246924	0.357569	0.66844	0.310871	cg09246924	37	13	77564706	13	76462707	CLN5	NM_006493	TSS1500	N_Shore
cg27276128	0.367655	0.67894	0.311285	cg27276128	37	19	52904218	19	57596030	ZNF528	NM_032423	5'UTR	S_Shelf
cg23824502	0.55042	0.86197	0.31155	cg23824502	37	8	94439976	8	94509152					TRUE
cg09463155	0.528302	0.840536	0.312234	cg09463155	37	7	72347051	7	71984987				N_Shelf
cg21220551	0.257594	0.571615	0.31402	cg21220551	37	9	127905013	9	126944834	SCAI;SCAI	NM_001144877;NM_173690	Body;Body	N_Shore		Promoter_Associated
cg16733866	0.169459	0.483933	0.314474	cg16733866	37	21	42792609	21	41714479	MX1;MX1	NM_001144925;NM_001144925	5'UTR;1stExon	Island		Promoter_Associated
cg25300167	0.572108	0.886979	0.314871	cg25300167	37	2	173999776	2	173708022	ZAK;ZAK	NM_016653;NM_133646	Body;Body		TRUE
cg13172001	0.547997	0.86288	0.314883	cg13172001	37	2	88390175	2	88171290	SMYD1	NM_198274	Body			Unclassified_Cell_type_specific
cg19318403	0.62947	0.944556	0.315086	cg19318403	37	7	107389546	7	107176782	CBLL1;CBLL1	NM_024814;NR_024199	Body;Body
cg12628672	0.567093	0.883143	0.31605	cg12628672	37	11	5951316	11	5907892
cg07940198	0.430967	0.747907	0.31694	cg07940198	37	4	74759644	4	74978508					TRUE
cg01143838	0.593717	0.911501	0.317784	cg01143838	37	3	193189957	3	194672651	ATP13A4	NM_032279	Body
ch.12.2487434F	0.414116	0.733385	0.319269	ch.12.2487434F	36	12	120634424	12	119118806				S_Shore
cg10879958	0.539121	0.858533	0.319412	cg10879958	37	5	68708084	5	68743840	RAD17;RAD17;RAD17;RAD17;RAD17;RAD17;RAD17;RAD17	NM_133342;NM_133340;NM_002873;NM_133339;NM_133341;NM_133343;NM_133338;NM_133344	Body;Body;Body;Body;Body;Body;Body;Body	N_Shelf
cg13506496	0.44839	0.7684	0.32001	cg13506496	37	9	136825187	9	135815008	VAV2;VAV2	NM_001134398;NM_003371	Body;Body		TRUE
cg22799069	0.33099	0.651185	0.320194	cg22799069	37	3	11764385	3	11739385				S_Shelf
cg14045509	0.579039	0.89955	0.320512	cg14045509	37	7	38028591	7	37995116
cg05226646	0.259889	0.58247	0.322581	cg05226646	37	X	39948256	X	39833200	BCOR;BCOR;BCOR;BCOR	NM_001123384;NM_017745;NM_001123385;NM_001123383	5'UTR;5'UTR;5'UTR;5'UTR	N_Shore
cg01102311	0.493947	0.816557	0.32261	cg01102311	37	19	36644751	19	41336591	COX7A1	NM_001864	TSS1500	S_Shore
cg10208113	0.633327	0.957309	0.323982	cg10208113	37	1	1179747	1	1169610	FAM132A	NM_001014980	Body	S_Shore
cg16689724	0.314985	0.639182	0.324197	cg16689724	37	6	112430512	6	112537205	LAMA4;LAMA4;LAMA4	NM_001105207;NM_001105206;NM_002290	3'UTR;3'UTR;3'UTR
cg20157873	0.351916	0.676136	0.32422	cg20157873	37	7	152788733	7	152419666
cg13684379	0.376543	0.700935	0.324391	cg13684379	37	10	1511173	10	1501173	ADARB2	NM_018702	Body
cg11386709	0.628036	0.952972	0.324936	cg11386709	37	6	131278559	6	131320252	EPB41L2;EPB41L2;EPB41L2	NM_001135554;NM_001431;NM_001135555	5'UTR;5'UTR;5'UTR
cg14564766	0.26155	0.587349	0.325799	cg14564766	37	4	178365990	4	178602984				S_Shelf
cg24900927	0.598409	0.92577	0.327361	cg24900927	37	5	75778823	5	75814579	IQGAP2	NM_006633	Body		TRUE
cg08605855	0.556297	0.884615	0.328318	cg08605855	37	7	86825549	7	86663485	C7orf23;DMTF1;DMTF1;DMTF1;DMTF1;DMTF1	NM_024315;NM_001142326;NM_021145;NR_024550;NR_024549;NM_001142327	3'UTR;3'UTR;3'UTR;Body;Body;3'UTR
cg12031346	0.583428	0.912638	0.32921	cg12031346	37	18	72206701	18	70357681	CNDP1	NM_032649	Body
cg17203155	0.318922	0.649334	0.330412	cg17203155	37	5	106901876	5	106929775	EFNA5	NM_001962	Body		TRUE
cg13912641	0.431818	0.762991	0.331173	cg13912641	37	11	58877370	11	58633946	FAM111B;FAM111B;FAM111B	NM_001142704;NM_001142703;NM_198947	5'UTR;5'UTR;Body	S_Shelf
cg24811772	0.558873	0.891061	0.332188	cg24811772	37	X	23682911	X	23592832				N_Shelf
cg13459077	0.553272	0.885633	0.332361	cg13459077	37	9	37261078	9	37251078	ZCCHC7	NM_032226	Body		TRUE
cg12992040	0.549834	0.882217	0.332383	cg12992040	37	8	99054441	8	99123617	SNORA72;RPL30	NR_002581;NM_000989	Body;Body	N_Shelf
cg04267000	0.617925	0.950553	0.332628	cg04267000	37	6	31848534	6	31956513	EHMT2;EHMT2	NM_006709;NM_025256	Body;Body
cg13419214	0.413986	0.747126	0.33314	cg13419214	37	Y	6341961	Y	6401961	TTTY8B;TTTY8	NR_003591;NR_001533	TSS1500;TSS1500
cg23506143	0.541191	0.875672	0.334481	cg23506143	37	5	55761274	5	55797031					TRUE
cg15776028	0.553594	0.888791	0.335197	cg15776028	37	15	79056312	15	76843367	ADAMTS7	NM_014272	Body	Island
cg17410803	0.309422	0.645779	0.336357	cg17410803	37	X	3260117	X	3270117	MXRA5	NM_015419	Body	N_Shelf
cg02489143	0.558656	0.895907	0.337252	cg02489143	37	3	97694462	3	99177152				S_Shelf
cg14316711	0.563128	0.900875	0.337747	cg14316711	37	9	125888315	9	124928136	STRBP;STRBP;STRBP	NM_001171137;NR_033234;NM_018387	Body;Body;Body		TRUE
cg14201929	0.461916	0.802575	0.340659	cg14201929	37	12	13720390	12	13611657	GRIN2B	NM_000834	Body	S_Shelf
cg16172099	0.477798	0.81847	0.340672	cg16172099	37	8	103750821	8	103819997				N_Shore		Unclassified_Cell_type_specific
cg13940239	0.364619	0.706156	0.341537	cg13940239	37	7	12810263	7	12776788					TRUE
cg09005322	0.0996045	0.442927	0.343322	cg09005322	37	12	25517881	12	25409148					TRUE
cg02657865	0.544628	0.887982	0.343355	cg02657865	37	6	32077744	6	32185722	TNXB	NM_019105	TSS1500
cg27452868	0.576471	0.924793	0.348322	cg27452868	37	4	42342980	4	42037737					TRUE
cg27089675	0.535951	0.884803	0.348852	cg27089675	37	10	123838499	10	123828489	TACC2;TACC2	NM_206862;NM_206861	Body;Body		TRUE	Unclassified_Cell_type_specific
cg24752836	0.507665	0.857042	0.349377	cg24752836	37	10	63733787	10	63403793	ARID5B	NM_032199	Body		TRUE
cg07452659	0.359259	0.708791	0.349532	cg07452659	37	16	83986635	16	82544136	OSGIN1;OSGIN1;OSGIN1	NM_182981;NM_182980;NM_013370	TSS200;5'UTR;Body
cg15484808	0.280604	0.630286	0.349682	cg15484808	37	6	33242542	6	33350520	RPS18	NM_022551	Body	N_Shelf
cg07661835	0.432357	0.782477	0.35012	cg07661835	37	16	89163578	16	87691079	ACSF3;ACSF3;ACSF3	NR_023316;NM_001127214;NM_174917	Body;5'UTR;5'UTR	N_Shelf		Promoter_Associated_Cell_type_specific
cg26321613	0.506878	0.857022	0.350144	cg26321613	37	7	158703554	7	158396315	WDR60	NM_018051	Body
cg19255084	0.562717	0.913282	0.350565	cg19255084	37	3	113412723	3	114895413	KIAA2018	NM_001009899	5'UTR	N_Shelf
cg00837899	0.432997	0.785352	0.352355	cg00837899	37	16	86326446	16	84883947					TRUE
cg01887804	0.404713	0.759242	0.354529	cg01887804	37	15	40697568	15	38484860	IVD;IVD	NM_002225;NM_001159508	TSS200;TSS200	N_Shore		Promoter_Associated
cg27623451	0.568885	0.924525	0.355641	cg27623451	37	3	171965350	3	173448044	FNDC3B;FNDC3B	NM_001135095;NM_022763	Body;Body
cg23401741	0.52399	0.880282	0.356291	cg23401741	37	19	32840408	19	37532248	ZNF507;ZNF507	NM_001136156;NM_014910	5'UTR;5'UTR	S_Shelf
cg21026199	0.430092	0.786842	0.35675	cg21026199	37	4	174912278	4	175148853						Unclassified_Cell_type_specific
cg27095074	0.309546	0.666365	0.356819	cg27095074	37	19	51928597	19	56620409				S_Shelf
cg12955069	0.522581	0.880313	0.357732	cg12955069	37	16	58593852	16	57151353	CNOT1;SNORA50;CNOT1	NM_206999;NR_002980;NM_016284	Body;TSS200;Body
cg17482963	0.548931	0.907178	0.358247	cg17482963	37	8	27591911	8	27647830	CCDC25	NM_018246	3'UTR
cg15897600	0.5697	0.93009	0.36039	cg15897600	37	6	35899334	6	36007312
cg23376501	0.498231	0.863017	0.364786	cg23376501	37	4	42331783	4	42026540					TRUE
cg23192604	0.396048	0.762555	0.366507	cg23192604	37	12	46151535	12	44437802	ARID2	NM_152641	Body		TRUE
cg08500138	0.488485	0.855228	0.366742	cg08500138	37	4	77743172	4	77962196					TRUE
cg15215544	0.503077	0.871208	0.368131	cg15215544	37	7	140718464	7	140364933				S_Shelf
cg12162100	0.463404	0.832529	0.369125	cg12162100	37	8	87529647	8	87598763	CPNE3	NM_003909	5'UTR	S_Shelf
cg13618936	0.35075	0.722543	0.371794	cg13618936	37	3	133174649	3	134657339	BFSP2	NM_003571	Body
cg15174791	0.453608	0.826291	0.372683	cg15174791	37	10	125707507	10	125697497					TRUE
cg03779973	0.340893	0.714929	0.374036	cg03779973	37	4	151001971	4	151221421	DCLK2;DCLK2	NM_001040261;NM_001040260	Body;Body	S_Shore
cg13261725	0.343059	0.718539	0.37548	cg13261725	37	6	25761975	6	25869954	SLC17A4	NM_005495	5'UTR
cg16865442	0.530281	0.90625	0.375969	cg16865442	37	21	37853516	21	36775386	CLDN14;CLDN14;CLDN14;CLDN14	NM_001146078;NM_001146079;NM_001146077;NM_144492	5'UTR;TSS1500;5'UTR;TSS1500
cg19825203	0.520095	0.897985	0.37789	cg19825203	37	5	146207271	5	146187464	PPP2R2B;PPP2R2B;PPP2R2B;PPP2R2B;PPP2R2B;PPP2R2B;PPP2R2B	NM_181674;NM_001127381;NM_181677;NM_181676;NM_181675;NM_004576;NM_181678	Body;Body;Body;Body;Body;Body;Body		TRUE
cg17913570	0.246134	0.62963	0.383496	cg17913570	37	Y	9382523	Y	9992523				N_Shelf
cg00529910	0.47928	0.863636	0.384356	cg00529910	37	16	89822293	16	88349794	FANCA	NM_000135	Body
cg25400614	0.53527	0.921131	0.385861	cg25400614	37	17	79863977	17	77457269	PCYT2	NM_002861	Body	S_Shelf
cg26627687	0.36172	0.749168	0.387448	cg26627687	37	17	58823592	17	56178374	BCAS3;BCAS3	NM_001099432;NM_017679	Body;Body		TRUE
cg20662018	0.27768	0.66611	0.38843	cg20662018	37	8	99126378	8	99195554	HRSP12	NM_005836	Body	N_Shelf
cg01728536	0.444018	0.834008	0.38999	cg01728536	37	X	7070451	X	7080451				S_Shelf
cg22808750	0.509518	0.899749	0.390231	cg22808750	37	8	9123484	8	9160894					TRUE
cg03820120	0.37172	0.763717	0.391998	cg03820120	37	5	115864207	5	115892106	SEMA6A	NM_020796	5'UTR		TRUE
cg13437307	0.429064	0.821773	0.39271	cg13437307	37	8	62211981	8	62374535	CLVS1	NM_173519	5'UTR		TRUE
cg19005763	0.464519	0.858153	0.393634	cg19005763	37	3	58225528	3	58200568	ABHD6	NM_020676	5'UTR	S_Shore
cg13191352	0.500271	0.895284	0.395013	cg13191352	37	10	130373079	10	130263069
cg17607330	0.508041	0.903772	0.395732	cg17607330	37	11	18429080	11	18385656	LDHA;LDHA;LDHA;LDHA;LDHA;LDHA	NM_005566;NM_001165415;NM_001135239;NR_028500;NM_001165414;NM_001165416	3'UTR;3'UTR;3'UTR;Body;3'UTR;3'UTR
cg12796841	0.514638	0.910847	0.396209	cg12796841	37	1	228331081	1	226397704	GUK1;GUK1;GUK1	NM_001159390;NM_000858;NM_001159391	Body;5'UTR;TSS1500	S_Shelf
cg18586983	0.474403	0.871311	0.396908	cg18586983	37	7	100993034	7	100779754
cg22838354	0.509606	0.907143	0.397537	cg22838354	37	17	78655284	17	76269879	RPTOR;RPTOR	NM_001163034;NM_020761	Body;Body
cg11613415	0.341003	0.740148	0.399145	cg11613415	37	14	21510384	14	20580224	RNASE7;RNASE7	NM_032572;NM_032572	1stExon;5'UTR
cg22510662	0.449606	0.850178	0.400573	cg22510662	37	5	36202853	5	36238610	C5orf33;C5orf33	NM_001085411;NM_153013	Body;Body		TRUE
cg13406243	0.379898	0.780822	0.400924	cg13406243	37	9	141013112	9	140132933	CACNA1B	NM_000718	Body	N_Shore
cg09573852	0.544828	0.946237	0.401409	cg09573852	37	8	42135771	8	42254928	IKBKB	NM_001556	Body		TRUE
cg18935349	0.179458	0.580978	0.401521	cg18935349	37	X	75004943	X	74921668	MAGEE2;MAGEE2	NM_138703;NM_138703	5'UTR;1stExon
cg14006096	0.539057	0.941392	0.402335	cg14006096	37	2	175595400	2	175303646				S_Shore		Unclassified_Cell_type_specific
cg08716255	0.491177	0.897603	0.406426	cg08716255	37	11	95433344	11	95072992					TRUE	Unclassified
cg13016851	0.378284	0.788091	0.409807	cg13016851	37	7	56295392	7	56262886				N_Shelf
cg05740254	0.493506	0.906061	0.412554	cg05740254	37	4	187148563	4	187385557	KLKB1	NM_000892	TSS200		TRUE
cg09247657	0.434498	0.850327	0.41583	cg09247657	37	14	100262149	14	99331902	EML1;EML1	NM_001008707;NM_004434	Body;Body	S_Shelf
cg24439448	0.412864	0.829274	0.41641	cg24439448	37	18	60264554	18	58415534				S_Shore	TRUE
cg02337614	0.477673	0.894824	0.417151	cg02337614	37	13	112609986	13	111657987				N_Shore	TRUE
cg05183646	0.467465	0.886493	0.419028	cg05183646	37	6	134491143	6	134532836	SGK1;SGK1;SGK1;SGK1	NM_001143676;NM_001143678;NM_005627;NM_001143677	3'UTR;3'UTR;3'UTR;3'UTR
cg14593290	0.39079	0.810513	0.419724	cg14593290	37	7	50529359	7	50496853	DDC;DDC	NM_000790;NM_001082971	3'UTR;3'UTR
cg22021022	0.495596	0.915322	0.419726	cg22021022	37	1	183275320	1	181541943	NMNAT2;NMNAT2	NM_015039;NM_170706	Body;TSS1500
cg17031967	0.486385	0.906298	0.419914	cg17031967	37	6	25297487	6	25405466	LRRC16A	NM_017640	Body		TRUE
cg27046117	0.462313	0.885997	0.423685	cg27046117	37	1	5125428	1	5025288					TRUE
cg21135483	0.414181	0.843085	0.428904	cg21135483	37	21	42830710	21	41752580	MX1;MX1	NM_001144925;NM_002462	3'UTR;3'UTR
cg13936363	0.43983	0.871465	0.431636	cg13936363	37	9	4116422	9	4106422	GLIS3;GLIS3	NM_152629;NM_001042413	Body;Body	N_Shore
cg10447644	0.521288	0.954245	0.432958	cg10447644	37	12	63397289	12	61683556
cg23648923	0.47577	0.912851	0.437081	cg23648923	37	2	24806444	2	24659948	NCOA1;NCOA1;NCOA1	NM_147223;NM_003743;NM_147233	TSS1500;TSS1500;TSS1500
cg18359328	0.160195	0.597595	0.437399	cg18359328	37	5	140004732	5	139984916
cg17930505	0.433426	0.871689	0.438262	cg17930505	37	1	230306100	1	228372723	GALNT2	NM_004481	Body		TRUE
cg07029226	0.40297	0.842921	0.43995	cg07029226	37	1	2104223	1	2094083	PRKCZ;PRKCZ;PRKCZ	NM_001033581;NM_001033582;NM_002744	Body;Body;Body
cg16692090	0.362263	0.804063	0.4418	cg16692090	37	4	25867290	4	25476388				S_Shore
cg20437132	0.437268	0.880027	0.442759	cg20437132	37	10	90647152	10	90637132	STAMBPL1	NM_020799	5'UTR		TRUE
cg14224441	0.239754	0.682594	0.44284	cg14224441	37	3	11743273	3	11718273	VGLL4	NM_014667	Body	N_Shelf
cg13366601	0.490594	0.934905	0.44431	cg13366601	37	7	158601007	7	158293768	ESYT2	NM_020728	Body	S_Shelf
cg18391127	0.443615	0.888991	0.445375	cg18391127	37	15	89462418	15	87263422					TRUE
cg15675198	0.360728	0.807084	0.446356	cg15675198	37	1	171686018	1	169952641	VAMP4	NM_003762	Body		TRUE
cg08876623	0.425719	0.87323	0.447511	cg08876623	37	3	104009869	3	105492559					TRUE
cg10658203	0.412053	0.861758	0.449705	cg10658203	37	15	94943926	15	92744930	MCTP2;MCTP2;MCTP2	NM_018349;NM_001159644;NM_001159643	Body;Body;Body		TRUE
cg01723291	0.177972	0.627869	0.449897	cg01723291	37	6	29855890	6	29963869	HLA-H	NR_001434	Body	Island		Promoter_Associated_Cell_type_specific
cg10210928	0.502298	0.954545	0.452247	cg10210928	37	7	2859695	7	2826221	GNA12	NM_007353	Body		TRUE
cg16516044	0.441022	0.895042	0.45402	cg16516044	37	2	88352636	2	88133751	KRCC1	NM_016618	5'UTR	N_Shelf
cg27019126	0.479642	0.936064	0.456422	cg27019126	37	18	56940693	18	55091673	RAX	NM_013435	TSS200	Island
cg25891789	0.388498	0.848804	0.460306	cg25891789	37	4	10147606	4	9756704				S_Shore
cg18546037	0.395334	0.855658	0.460324	cg18546037	37	3	121363104	3	122845794	HCLS1	NM_005335	Body		TRUE
cg07805911	0.419436	0.887383	0.467947	cg07805911	37	7	818287	7	784813	HEATR2	NM_017802	Body	N_Shelf	TRUE
cg25779302	0.394249	0.864807	0.470558	cg25779302	37	3	171823439	3	173306133	FNDC3B;FNDC3B	NM_022763;NM_001135095	5'UTR;5'UTR		TRUE
cg12036553	0.401928	0.876009	0.474081	cg12036553	37	10	1148121	10	1138121	WDR37	NM_014023	Body	Island
cg16997671	0.440494	0.916405	0.475911	cg16997671	37	5	179121005	5	179053611
cg00346256	0.429996	0.908772	0.478776	cg00346256	37	19	6707507	19	6658507	C3	NM_000064	Body	Island
cg08882171	0.264565	0.74553	0.480964	cg08882171	37	6	26528628	6	26636607					TRUE
cg18812058	0.301183	0.785346	0.484163	cg18812058	37	8	119630154	8	119699335	SAMD12;SAMD12	NM_001101676;NM_207506	Body;Body	N_Shelf
cg18883476	0.272816	0.758013	0.485197	cg18883476	37	7	153952268	7	153583201	DPP6;DPP6	NM_130797;NM_001039350	Body;Body		TRUE
cg24670219	0.392462	0.878735	0.486273	cg24670219	37	8	312269	8	302269				N_Shore
cg24415213	0.352878	0.839465	0.486586	cg24415213	37	12	52868284	12	51154551	KRT6C	NM_173086	TSS1500
cg25709679	0.415243	0.90482	0.489577	cg25709679	37	15	99206764	15	97024287	IGF1R	NM_000875	Body		TRUE
cg16581085	0.407978	0.900602	0.492625	cg16581085	37	16	85465628	16	84023129				S_Shore
cg11619797	0.308197	0.806236	0.498039	cg11619797	37	7	90228764	7	90066700				S_Shelf
cg06935052	0.260505	0.762416	0.501911	cg06935052	37	22	24176449	22	22506449	SMARCB1;SMARCB1	NM_001007468;NM_003073	3'UTR;3'UTR
cg18072384	0.326665	0.829154	0.502489	cg18072384	37	7	47396177	7	47362702	TNS3	NM_022748	Body		TRUE
cg00944227	0.194078	0.699145	0.505067	cg00944227	37	8	124215152	8	124284333	FAM83A;FAM83A;LOC100131726	NM_032899;NM_207006;NR_024479	Body;Body;TSS200
cg08990543	0.368421	0.873656	0.505235	cg08990543	37	4	57306194	4	57000951	PAICS;PAICS;PAICS	NM_006452;NM_001079525;NM_001079524	Body;Body;Body	S_Shelf
cg24049629	0.409122	0.914363	0.50524	cg24049629	37	3	50376475	3	50351479	RASSF1;RASSF1;RASSF1	NM_170712;NM_170714;NM_007182	TSS1500;Body;Body	N_Shore
cg11545072	0.285895	0.791501	0.505605	cg11545072	37	4	128548799	4	128768249				S_Shelf
cg21167587	0.334524	0.861314	0.52679	cg21167587	37	9	36397390	9	36387390	RNF38;RNF38;RNF38;RNF38;RNF38	NM_194328;NM_194330;NM_194329;NM_194332;NM_022781	5'UTR;5'UTR;Body;5'UTR;Body	N_Shelf
cg18762036	0.280425	0.807983	0.527558	cg18762036	37	2	107872062	2	107238494
cg04291970	0.251706	0.78202	0.530314	cg04291970	37	8	11226339	8	11263749	C8orf12	NR_026814	Body
cg12317217	0.363281	0.894856	0.531575	cg12317217	37	5	140203603	5	140183787	PCDHA2;PCDHA1;PCDHA1;PCDHA3;PCDHA4;PCDHA5;PCDHA5	NM_018905;NM_031411;NM_018900;NM_018906;NM_018907;NM_031501;NM_018908	Body;Body;Body;Body;Body;1stExon;1stExon	Island
cg20422052	0.366704	0.899926	0.533222	cg20422052	37	8	143474721	8	143472628	TSNARE1	NM_145003	5'UTR	S_Shelf
cg08886711	0.0968858	0.633847	0.536961	cg08886711	37	12	48399180	12	46685447	COL2A1;COL2A1	NM_001844;NM_033150	TSS1500;TSS1500	Island		Unclassified
cg15433470	0.344996	0.883525	0.53853	cg15433470	37	7	129075961	7	128863197	FAM40B;FAM40B	NM_020704;NM_001134336	Body;Body	S_Shore
cg12313886	0.401882	0.944428	0.542546	cg12313886	37	10	134596214	10	134446204	INPP5A	NM_005539	3'UTR	N_Shore
cg09188600	0.17199	0.718886	0.546896	cg09188600	37	12	132974035	12	131484108				N_Shore
cg12970830	0.243502	0.791313	0.547811	cg12970830	37	7	141951023	7	141597501					TRUE
cg16358155	0.264013	0.83253	0.568517	cg16358155	37	3	195490169	3	196975840	MUC4;MUC4;MUC4	NM_018406;NM_138297;NM_004532	Body;Body;Body	S_Shore
cg26806016	0.281235	0.852002	0.570767	cg26806016	37	1	21307656	1	21180243	EIF4G3	NM_003760	Body		TRUE
cg14368972	0.33387	0.904726	0.570856	cg14368972	37	9	2717146	9	2707146	KCNV2	NM_133497	TSS1500	N_Shore
cg26223336	0.360399	0.931267	0.570867	cg26223336	37	8	61629454	8	61792008	CHD7	NM_017780	5'UTR	S_Shelf
cg07080785	0.313117	0.890022	0.576905	cg07080785	37	15	31737459	15	29524751				S_Shelf
cg19577671	0.187832	0.797495	0.609663	cg19577671	37	19	42782524	19	47474364				N_Shore	TRUE
cg02064569	0.207961	0.821701	0.61374	cg02064569	37	X	103809580	X	103696236	IL1RAPL2	NM_017416	TSS1500	N_Shore
cg18155853	0.331337	0.949795	0.618457	cg18155853	37	3	169540504	3	171023198	LRRIQ4	NM_001080460	1stExon
cg22372096	0.260322	0.881534	0.621212	cg22372096	37	19	3810782	19	3761782	ZFR2	NM_015174	Body	Island
cg12082130	0.262336	0.894823	0.632488	cg12082130	37	X	69486740	X	69403465	ARR3	NM_004312	TSS1500
cg20723425	0.266268	0.904626	0.638358	cg20723425	37	17	76570962	17	74082557	DNAH17	NM_173628	Body
cg09807356	0.314384	0.963978	0.649594	cg09807356	37	16	88905700	16	87433201	GALNS	NM_000512	Body	Island
cg18881094	0.216697	0.876316	0.659619	cg18881094	37	6	30885141	6	30993120	VARS2;VARS2;VARS2	NM_020442;NM_001167733;NM_001167734	Body;Body;Body	S_Shelf
cg14525755	0.106706	0.825231	0.718525	cg14525755	37	12	132671672	12	131237625				N_Shelf		Unclassified_Cell_type_specific
