# Supplementary material for: SNF5 Is an Essential Executor of Epigenetic Regulation during Differentiation
Source: PLoS Genet. 2013 Apr 25;9(4):e1003459. doi: 10.1371/journal.pgen.1003459 (PMC3636213; doi:10.1371/journal.pgen.1003459)
Supplement: Table S6 — The GO analysis and gene list of 2D plot. (XLSX) [file pgen.1003459.s012.xlsx]

## Sheet: Sheet1
KD 1	OE 1		KD 2	OE 2		KD 3	OE 3
FAM46B	ALDOC		LOC643272	ERVK6		LOC401720	DDIT4
VASH2	LGALS1		HS.575696	ZCCHC12		GPC3	BHLHB2
DPYSL3	ZNF296		GDF3	GDF3		CYP26A1	IGFBP2
FLJ44379	PRODH		HS.574590	SFRP2		CHST15	MT1E
PLP1	OLFML3		L1TD1	PTPRZ1		HS.355933	MT1A
RHD	MIR1974		MIR1974	MYC		TXNIP	MT1F
RHCE	SLC8A2		ZSCAN10	HS.270778		SH3BP4	MT2A
ZIC2	PFKP		UCA1	HIST1H2AC		E2F5	ZNF395
LMNB1	TET1		HS.579631	HS.579631		IGFBP5	MIAT
TUBB3	GFPT2		NANOG	THBS2		CST3	COL7A1
VAT1L	SLC29A2		DNMT3B	EPCAM		FLRT3	SLC2A1
PRODH	C17ORF49		GAL	NANOG		GPX8	CRABP2
TMSB15A	IFITM3		ERVK6	RHCE		IGFBP2	MT1H
LOC653907	RRAS		DPPA4	LOC645682		CD99L2	INSIG2
SPOCK1	APOC1		PODXL	SORBS2		C12ORF57	LOC729978
GPC4	IFITM1		VENTX	MRS2		PNCK	HOOK1
NME4	H1FX		UTF1	HIST1H2BK		TMEM137	JUN
PGA5	LOC283340		PIM2	FKSG30		COL4A5	GOLGA8B
HIST1H4K	FLJ44379		PCSK9	SEPHS1		MEIS2	EMP3
PQLC3	PLA2G3		CAMKV	NR5A2		BIN1	JMJD1A
NCAPD2	YEATS2		PDZD4	HIST1H2BJ		TRIB3	VAT1
CENPV	SYT6		TRIML2	USP44		RIMS3	PAM
TNMD	EYA3		HIST1H2BJ	LOC440063		RHOBTB3	LOC149501
ERBB2	ZNF462		DPPA3	LOC387882		LOC100133840	NES
CHN1	EXOSC7		ZFP42	ETV5		QRFPR	NAPB
LIN28	LY6E		LOC643287	PGAM1		RPS6KA2	HES4
LOC730051	SCD		GLIPR1L1	HESX1		GPR162	PSME1
CDCA5	SNORD104		CKMT1A	ASRGL1		C14ORF153	AHSA2
RGS2	ZNF581		NLRP2	TACSTD1		LOC285908	JUND
GFPT2	LOC100129673		HS.270778	HS.575696		ATF5	VCX-C
SHPK	FGFR4		JARID2	HIST2H4A		LMOD3	ID2
ACBD7	LOC100129580		RPL36A	METTL7A		HS.544637	STAG3L2
CDC25B	C7ORF59		LRP4	TIMP4		KIAA1751	MGC16121
HIST2H4A	KIF22		LOC728873	C6ORF211		LOC728809	FLRT3
AEN	NUDT1		LOC649970	CTSC		INHBE	LOC653344
C1ORF135	TCF7L1		HS.177654	PPM1H		NLRP8	MST1
NT5DC2	NT5DC2		LOC100132934	LOC100132934		LIPA	LOC649639
LOC731314	NME4		HIST1H2BK	HAS3		MAP1B	HAND1
PDPN	MICB		USP44	HS.574590		LOC654103	VCX
C9ORF58	TRIM28		UGP2	HS.250648		SHROOM4	VCX3A
CENPA	UCP2		KCNK12	ZSCAN10		ZDHHC11	LOC100190986
LRIG1	ACTN3		SEPHS1	LOC646316		LOC401098	LOC440353
HS.66187	CDC25B		ALDOC	PLS3		LEFTY2	DUSP3
GNG4	SNRPA		GJA1	GABRA5		CAP2	TMEM91
REEP6	KIF2C		HAS3	LOC646769		RARRES2	C21ORF58
LAMC3	TROAP		RPL29	GPC4		HSPC268	HS.383921
TYMS	SPC24		ETV5	DNAJB6		NBPF20	HS.473191
NCAPG	EME1		C6ORF173	RUVBL1		TGFBR3	LOC401720
PABPN1	TCEAL2		LOC389873	RPL29		LOC100129269	MAGT1
MARCKSL1	LOC651816		D4S234E	LMNB1		PLA2G4B	PLA2G4B
SOX21	C9ORF58		CKS1B	GJA1		NCOA6	MZF1
ITPR3	TACC3		LOC646316	DPPA3		FAM175A	LOC613037
VPS37B	C17ORF61		C9ORF135	CD2AP		RPS23	SFRS5
PPM1H	ARL2		SPRY2	NUP160		LOC653158	ACAD11
ASH2L	CELSR3		LOC388755	THY1		FKBP9L	CST3
PROM1	MTA3		HS.10862	SPRY4		LOC730994	DHRS3
SUSD2	AURKB		EPHA1	NUP35		TTC17	TCN2
ZNF462	RET		TCEAL2	MYCN		LOC100132585	NPEPL1
PDE9A	PTTG3P		CDCA3	GLB1L3		TLN2	GPC3
HNRNPA3	HNRNPL		RAB25	LOC646817		FLJ10916	P4HA2
E2F2	C12ORF24		CKMT1B	ALDH1A3		LOC728661	WDR13
UCP2	PDE9A		POLR3G	FBXO5		SMAD6	SSBP2
DBNDD1	SOX2OT		CD9	GINS3		LOC729120	FTL
ADA	SLC2A3		TRIP13	KPNA2		BLZF1	MIB2
CDCA4	ARAP3		HESX1	ZNF273		DDIT3	ACCS
CRMP1	PRSS8		SPRY4	ZXDB		PIP5K2B	LOC646123
EPHA4	FLJ35767		LOC283340	MBP		LOC642934	TPP1
MEX3D	HLA-DOA		PELI1	TBC1D23		EVI5	TYK2
STMN2			F11R	SLC16A10		HS.572444	LOC283755
TROAP			TTK	HIST2H4B		COL5A1	LOC653158
BARD1			PTMA	SYNCRIP		BTG1	FAM39DP
SOX8			LQK1	C15ORF23		LOC648852	ABCB6
RET			RASL10A	LOC652615		LOC153561	LOC400304
MGC40168			LOC442727	G3BP2		GAB2	GANAB
SOX2			HES6	SNORD16		BAZ2B	BBX
KAL1			ITLN2	RRS1		HS.542993	NFE2L1
H1FX			HS.181245	DDX21		DUSP19	MGC52000
FEZ1			HIST1H2AC	ZFP42		IRX3	HSPB1
PRICKLE1			TET1	PDZD4		CLIP3	OSBPL7
RPL28			EPCAM	HNRPC		UPLP	LOC255783
DHTKD1			HSP90AB1	PMAIP1		LOC100129211	NDRG1
EFNB1			MYC	HNRNPAB		DUXAP3	TKT
MTA1			NFE2L3	CD24		C8ORF45	STAG3L3
ILF3			ABHD9	HNRNPA1		LOC728903	BCL6
CAD			CLDN6	NLGN4X		CCDC136	BTG1
SRC			LOC646197	RPRD1A		AGPAT4	MBD6
GPM6B			LOC728026	TMEM20		LOC653778	LOC392437
CCNB1IP1			PAK1	C9ORF135		LOC730313	FKBP9L
IMPA2			C10ORF75	SPRY2		DOCK11	CLIP3
AIF1L			HELLS	DBC1		USP49	LOC284988
PLS3			C14ORF106	CES3		PHC2	STX16
OTX2			SLC2A3	MTMR12		STAMBPL1	STAT2
TNFRSF21			LOC100133012	GPM6B		LOC100190938	POLR3GL
AMOT			LOC100133489	HS.181245		LOC100129502	SMCR5
KIF3C			FLVCR1	PPIA		LRRC37B2	IFI27L2
FST			TIMP4	CTGLF7		TCN2	TTC14
TEAD2			FOXA3	KAL1		MXD4	USP49
PGA3			HHLA2	LOC402221		RGL1	CCDC14
ALPL			ZNF273	PRDM14		LOC255167	FLJ44124
RGMA			NP	YARS2		THBS3	LOC23117
BEND3			LOC440063	CDC2		AXIN2	SLC7A5
SOX2OT			LOC731496	RBPMS2		C2ORF69	SULT1A1
YEATS2			SORBS2	SLC39A10		LOC90586	RARRES2
LOC148915			LOC642852	LOC653505		COL5A2	TXNIP
TRNP1			TCL1B	KIF23		LOC100127975	ZDHHC11
GINS4			DCTPP1	HHLA1		MFGE8	RIMS3
SNRPA			GABRA5	RCC2		LOC441087	RNY3
CTSC			RIMKLB	KCNK12		SPG11	LOC100132740
SRGAP2			HMGCS1	NUP153		ADAM23	ISG15
ACCN1			SYNCRIP	LOC732007		HSD17B7	PMM1
HN1L			C15ORF42	HELLS		ARHGAP21	KCNQ1OT1
TACC2			PHF5A	VENTX		LOC100132391	RCN3
LOC100133224			LOC729964	RFC3		IL13RA2	POMT1
LOC646347			METTL7A	ISG20L1		LOC440585	VEGFB
ZNF581			ALDH1A3	LOC643272		WDR19	PLIN5
MUM1			C15ORF23	DNMT3B		LOC100133516	HS.545615
SNHG1			ITM2A			LOC100128084	DPYSL4
SFRS15			DIAPH2			HS.4892	QPRT
PRAGMIN			CDH1			BMS1P5	BIN1
LOC100131735			MBP			LOC728888	IFI6
ETNK2			EMG1			PITX1	LRRC37B2
SNORD104			PRSS8			LAMA5	RENBP
TBCD			BCL11B			TMEM132A	AK3
NRIP3			CDC2			LOC645452	PPP1R15A
KNTC1			LYAR			KLHL24	HS.435263
NAV1			ARRB1			GPT2	LOC728888
RHOT2			TIPIN			HIATL2	SLC29A4
ATIC			LOC100132032			NBPF10	FAM125A
LOC729423			SLC39A10			KCNG1	COL9A2
PREX1			CD320			CCDC125	CTSA
MGC11082			VRK1			UROS	APBB3
LOC644715			TACSTD1			GPSM1	LOC100132247
BTK			C20ORF54			CD99	RILPL1
PODXL2			RBPMS2			PALLD	FLJ22795
LOC388796			FLJ35767			INPPL1	SESN2
LOC648526			AK3L1			C14ORF85	DDIT3
PPP1R10			MASTL			TSPAN3	SIDT2
HS.25892			LOC100129076			ZNF738	HINT2
LSM4			HMGCR			LOC100130276	COMMD3
PHF20			OC90			CADM1	EXOSC6
TNPO3			LOC100130511			TDRD1	FAM115A
SLC1A3			SSSCA1			MBD6	TNFRSF12A
UNC5A			SNRPF			C21ORF24	USP36
SMS			C11ORF48			ZNF264	LAMB2
ASCL1			GMNN			PVRL3	LOC100130557
LIG1			PMAIP1			LOC100131989	GSDMB
AP1S2			EXOSC9			CCDC14	WSB1
NNAT			SLC8A2			IFFO1	PHF21A
SH3PXD2B			LOC391532			BRP44L	CRABP1
KIAA0101			CYP2S1			VEZF1	LAMA5
UBA1			YBX2			NBPF8	LOC440585
LOC648980			DNAJB6			C8ORF37	C9ORF127
COL9A1			FAM113B			WARS	TMEM62
TBC1D14			SNORD3D			ATP6V0D1	UPLP
TRMT5			LOC284620			ITPRIP	LOC132241
VCL			THBS2			P2RY11	TULP3
TFAP2A			C15ORF27			ARHGEF6	NCRNA00085
HS.4988			CRYBA4			EML1	TMEM106C
ADAMTS9			SLC16A10			LRRFIP1	ECHDC2
ZMYND8			LOC100132457			CMIP	ARHGEF4
LOC441481			EBPL			MAGT1	REEP2
KIAA0363			DMKN			LOC200030	BSDC1
RHPN2			SERPINH1			SSBP2	NINL
C18ORF56			HIST2H2AC			LOC440353	RHOQ
NXN			GLB1L3			C20ORF108	KRTCAP2
LOC388275			LOC392285			SEPP1	USP11
TOX3			HS.333856			CTHRC1	WDR26
SH3PXD2A			RPS24			C1ORF24	WDR19
LOC729679			MSH6			ARL16	CDC2L6
MMD			C3ORF52			RAB40B	VLDLR
HNRPA1P4			SYT13			LOC100134159	PLCB1
LITAF			VAMP8			THAP10	SLC39A4
MPRIP			ZNF680			ZMIZ1	ZNF786
RNPS1			LOC100130003			FAM113A	CARD8
LOC100128221			LOC653505			IL10	ZMIZ2
PYCR2			SLC2A14			RCN1	RALGDS
LIMA1			ATAD2			SESN2	FAM38A
TPM2			ACTN3			PTPLA	ZNF653
C12ORF32			HIST1H1C			SGSM2	HRK
LOC341230			LOC650157			STC2	IFI16
CKB			LOC729646			MSRB2	TMEM9
FBLN1			HMGB1L1			PIK4CA	INHBE
DDIT4L			HIST2H2AA3			SDHAP2	TTC17
SGTA			HS.543887			LOC644852	CARS
C21ORF33			PTBP2			CES1	SETBP1
CCBL1			LOC402644			HS.435263	LOC100129882
LOC389332			LOC100132863			LOC100134868	GPT2
SFRS7			C20ORF46			ACAD11	PLXNA3
OGDH			TERF1			PPP1R15A	AHI1
TRIM22			LOC168474			GSTTP2	CECR7
HS.485155			SEMA6A			REEP1	BLZF1
BRD3			C14ORF156			TTL	SCNN1D
ZIC3			MICB			PLA2G2D	PCDHB9
CTNNAL1			PROCR			FLJ44124	SGSM2
FABP6			HCP5			LOC646996	SNCAIP
SNORD31			MRS2			LOC730990	IRX3
SDHC			LRP8			LOC100128062	KATNAL1
AGRN			GABRB3			ZNF223	THBS3
LOC652900			HHLA1			PMM1	BBS2
ACACA			MRPS17			LILRB1	H19
PCGF2			SCNN1A			CCBE1	CAPRIN2
TIMELESS			H2AFZ			SPN	TMEM120A
ENSA			TLCD1			CDKN1A	LOC285908
C20ORF160			ARSE			LOC728457	FAM39E
UNC119B			LOC643997			XRCC2	LOC158301
NELF			LOC134997			DPY19L1	VGLL4
LOC151162			LOC646817			LOC100128126	CTGLF3
CHTF18			CD2AP			CARD8	RBM33
COQ2			RPS26			ZNF91	FLJ12078
TUBB6			YARS2			MGC16121	ERGIC3
TRIM26			EYA3			PRRG4	PDE4C
SPRED2			CEBPZ			KIAA1324L	PTPDC1
THOP1			MKRN1			ZDHHC8	KIAA0182
PPP2R2B			TUBB4Q			LOC647389	LOC100130070
LOC730534			SLC25A19			STEAP3	P4HB
LOC654260			CHES1			SLC29A4	FLJ10916
MECR			LOC643778			COL7A1	PPM1F
SLC35A4			LOC441455			PBX3	ANP32B
SOX13			PHACTR1			STAG3L2	LEPREL1
CHST7			EMID2			PLCB1	REC8
ATXN7L3			LOC100132918			LOC730167	CHD9
BASP1			LOC128192			SETBP1
KLHL18			COCH			KIAA0182
BSG			CXXC6			EIF2AK4
SLC37A4			SAT1			PCDHB9
CNTNAP1			LRAT			STAG3L3
KIF26A			BRIX1			PABPC1L
SREBF1			EPHB4			HS.562875
NCAPG2			ZFPM2			ANKRD30B
MTHFD1L			RPS26L			SIK3
LOC652324			IER3			DENND5B
FNDC4			IDI1			WSB1
SFXN2			CDH3			ASNS
MAPK10			A2ML1			ALDH1L2
LRRC8A			KNG1			ZFHX3
IPO9			LOC648927			MBD4
RAB3B			NLRP4			LOC100130053
SEMA4D			CCDC28B			NFE2L1
HMBS			PAK1IP1			LOC399900
C8ORF40			IGFBP7			CRBN
PNMA2			LHX6			TLE4
ETFB			LOC387820			LOC100129362
RADIL			LOC147646			HEG1
DCXR			SH3GL3			LIX1L
ITFG3			CD19			HOXB2
FOLR1			CCRN4L			PRICKLE2
MFN2			NPW			PTPLAD2
SLC25A29			NLRP7			ADM2
HS3ST3A1			LOC650646			CKAP4
NUP43			LOC653610			RBM33
JAG1			TLE6			TNFSF15
TAC3			ZNF845			HCG2P7
RPRML			DUSP5			SFRS2B
HS.130036			GEMIN6			LOC100134053
C9ORF142			WDR55			TMEM17
ARL6IP6			NOLC1			CEBPB
CCDC18			MTF2			HS.155736
PTMS			HDGF			CDKN2AIPNL
PCCA			LOC100134361			DDIT4
CELSR2			PRPS2			NRIP1
NOTCH3			POP1			OVGP1
ZNF775			SS18L2			LOC100133772
DAGLB			LOC728823			FRMD4A
SCLY			FGD4			BCDIN3D
C19ORF60			STELLAR			FTHL7
DSN1			TUBB2A			LOC100133233
LOC642817			SMARCAD1			PPFIBP2
ANKDD1A			ITGB1BP3			COX19
TOPBP1			LOC439953			CDK5RAP3
TLK2			APIP			TNFSF14
LOC100131737			ZDHHC19			LOC100130886
LOC652672			SNORA61			EMD
LOC441268			PSITPTE22			CBX4
DENND4B			PSMA2			POFUT1
KLF15			OAT			PHTF1
USP13			GTF2E1			RPRC1
TMEM44			P2RY5			LOC100132247
TBCB			NMB			C21ORF58
ALDH7A1			LOC646278			LOC100132727
ASS1			MRPL17			SSTR2
LOC392871			PPIH			FAM50A
RMND1			MMP25			RNF165
CPS1			HIST2H2AA4			GYPC
IMMT			AMY1A			LPXN
SLC16A9			ANKRD35			C5ORF28
NTN3			SNORA76			SULF2
EPB41L5			UBE2O			LOC158301
TAGLN3			ERCC6L			ZNF671
TOE1			LOC100128410			C15ORF17
CARKD			ARHGEF10			LOC100132740
SNRK			PYCARD			NWD1
TYRO3			C1QL4			LOC728565
PJA1			PRRX2			DDX51
KIAA0922			TUBB2C			ZNF362
SCARB1			LOC728493			ALPP
TRIM24			CCDC5			POLR3GL
TNRC9			KCNK1			FKBP14
YAF2			CETN3			ZNF486
FLJ33996			DUS2L			ETFDH
FLOT2			SLC4A7			DCAF10
ANAPC1			MRPL2			C12ORF51
PRR3			MARVELD2			PFAAP5
C9ORF69			PHF15			CDC2L6
HNRNPA0			FOS			U2AF1L2
ENC1			POLR2F			ST3GAL3
GUCA1A			VIL2			HINT2
IRX2			GARNL4			DMC1
MAPK4			JAZF1			FTHL12
LOC100132139			NARG1			SPOP
AKR1B1			KCNMB4			BCL6
SNORD17			UBL5			TCF25
DUSP16			PRKAR1B			NRCAM
ZNF696			HIST1H2BC			APPBP2
CTNNBIP1			WDR12			CTDSP2
PGA4			LOC283683			MFF
LOC647719			DLG4			CCDC50
OLIG3			DNMT3L			LOC653829
RCOR2			TMEM14A			CEP27
MRPL23			HIST1H2BG			KLHL22
DGCR2			SLC16A3			LOC389765
ROR1			LOC100129201			HPCAL1
LFNG			LOC100128086			HS.371609
NELL2			C6ORF126			PLIN5
MICAL1			KCNS1			PINK1
SPTLC2			PBK			VGLL4
LOC100131866			LOC728715			KBTBD9
HIST1H1E			ZNF143			FOXO3
FAT1			ORC2L			NAP1L4
NPLOC4			SNORD3A			RAXL1
MIR1978			CCND1			ZNF14
PPP1R16B			MAN1C1			MFSD11
DEAF1			FBN3			LEP
LOC645937			LOC441377			IFNGR1
RNF41			DPPA2			MIB2
GAMT			HBQ1			TRAK2
CEP110			NPTX2			TEX2
DAPK1			CHST4			PRKD1
SMC1A			HSPA8			BBX
LOC340274			LOC391045			PCDHB19P
SFRS13A			ZIK1			SULT1A1
PAQR4			STOM			ZNF512B
EIF4EBP2			LOC646849			SGCE
LPCAT1			HS.195391			ZNF652
IER5			CLDN10			C15ORF63
C5ORF13			ITPK1			GOLM1
CTSK			MMP9			ARHGEF2
C9ORF46			C15ORF39			STK40
MTUS1			HIST1H2BO			LIME1
PELI2			YTHDF2			FAM38A
FAM86C			PRR13			ZNF252
FZD8			ECEL1			KLHDC2
CHMP1A			TMEM141			CHN2
GLOD4			SLC9A3R1			ODZ4
TSPAN18			CLCNKA			ZNF786
KIAA0513			HIST1H2AM			C16ORF58
C9ORF86			SNRPC			ZNF69
NOL9			SNORA16A			SLC6A9
LOC645332			SMPDL3B			DEM1
FGFR1			GRB14			REPIN1
TIAM1			FGF2			LOC728734
FGFR3			MGC57346			SLC35E1
SLTM			LOC100128585			HINT3
EIF4H			MRPL32			FAM73A
C1ORF159			CYB5A			ZMAT3
KIF5C			HS.335413			CHD9
ABCC1			LOC649679			PTOV1
UBE3B			PHF17			ZNF358
REEP5			NME1			ZFP90
BST2			RASL11B			NUBPL
C12ORF56			CLCNKB			PNPT1
CBX2			SLC25A10			CLCN7
PC			LOC642946			CALU
FANCI			ZNF721			RIOK3
SOBP			LOC646821			ZNF428
RANBP10			PRIM2			MGC52000
PTPLB			ZNF614			PIGQ
C21ORF69			EIF1AX			IFI16
ATG10			TRIM6			TTC13
CPXM2			SNORD12			MBTD1
ACADS			TUBB2B			SDC2
WASF2			TMEM2			FAM13B
MEGF10			NTS			GPX3
MSI1			LOC730525			ACCS
C16ORF56			HS.348514			LOC643911
PCDH18			C16ORF73			TNFRSF19
PSPH			FLJ12684			N4BP2
GTF2H4			ZNF480			FAF2
CENPT			LEMD1			DISP1
LOC100129681			C14ORF169			KBTBD11
PMVK			LOC100129608			GARS
ZBED1			PRRG2			C21ORF2
PIK3C2B			GUCY2C			LOC653086
LOC285550			ADAM19			PIK3R2
LOC100127971			SPINK2			PEX11B
PPAPDC3			FAM162B			C4ORF29
RTTN			FLRT2			PDCD4
RAD9A			FERMT1			LOC729090
MLL			RINL			SESN3
GPR19			LOC729686			CXCR7
CACNA2D2			RYR3			CEBPG
SAP30BP			RRAS2			LRP5L
ROGDI			SKP1			LOC100129828
LINGO1			HLA-DMA			LOC440348
ENO2			TOMM6			NBAS
TP53BP1			PLSCR1			PPA2
CMTM7			LOC649555			TNFRSF10B
LOC729843			POLR2L			LOC648921
			HLTF			LOC440704
			LOC729086			SCNN1D
			ZNF684			LOC100128098
			HS.534061			PIGX
			TOMM40L			KLHDC5
			TJP3			NINL
			FBXO36			SLC3A2
			C17ORF63			GTF2IRD2B
			LOC399988			GDF15
			SHROOM3			NCOA7
			ABCE1			DHX32
			SLC7A10			LOC100130367
			TDGF1			ARMCX4
			LOC401321			KCNH6
			GTPBP4			LOC400446
			P704P			STX16
			RG9MTD1			HS.383921
			ZNF341			IGSF3
			MYST2			FAM39DP
			C6ORF66			TMEM106A
			LOC100130769			RILPL1
			C1ORF172			LOC644250
			PIM1			PFKFB3
			NSDHL			FLJ46309
			LRFN5			RBM5
			SPRY1			GPR1
			HSPC159			LOC100132060
			HS.430851			FLJ40722
			SPINT1			HS.549989
			PPP1R1A			SHANK2
			PRPF19			ZCCHC24
			RPS26P10			ANKFY1
			P2RX2			C5ORF5
			CCDC34			CSAD
			FARSA			FTHL3
			SFPQ			LHX2
			NUDT15			CIAO1
			HIST1H4E			LOC613037
			C17ORF58			C9ORF130
			CRYM			TTLL7
			RPS7			HSPBAP1
			LSM3			GLTSCR2
			FLJ90231			FAM20C
			BNC2			PHF21A
			CCDC58			FAM39E
			UPK1A			FAM120B
			LOC100129566			CCNI
			PHKA1			VAT1
			CYP2F1			DVL3
			FCHO1			RBM24
			SOX4			TMCO3
			PNO1			VPS8
			SNHG9			KLHL29
			FBLN2			EFHC1
			MRPS18C			ERCC1
			LAD1			LOC100128510
			DLG3			FTHL8
			C8ORF41			GRAMD3
			SNORD36A			PTPDC1
			BARX1			HS.137971
			DOK4			GALNT3
			RAB34			CIB1
			SIP1			LRRC41
			CD74			LOC729009
			LOC100131261			LOC400721
			SNRPB2			CUTA
			FUT4			SMCR5
			SPIN4			REEP2
			PFTK1			HS.489254
			LOC399804			AK3
			C13ORF25			RNF175
			PSMB2			C2ORF63
			DPY30			BMP2
			CD44			LMF2
			ESCO1			UAP1L1
			ZNF254			RAB22A
			LOC100129195			LOC100128505
			CLDN7			HS.296031
			PIK3R4			EMILIN2
			TGFBI			CACNA1H
			TMSL3			C1ORF41
			EMR2			CTGLF3
			F2RL1			LOC100130168
			IQGAP1			ST6GALNAC3
			TOP1P2			SLC16A12
			MRPS28			LOC255783
			GSTO1			DMXL2
			UBR5			OCIAD1
			RHBDF2			SMA4
			ELF1			LARP6
			UTP15			SLC4A5
			TMEM145			SYT11
			LOC143666			CBLB
			PTGES3			ARRDC3
			LOC645822			RNF213
			RBP7			DCTN3
			AHCTF1			DIS3L
			LOC100128975			LOC729978
			C9ORF114			SAPS2
			ALDH3A2			ERGIC2
			LOC100134300			LOC646123
			PANK3			USP11
			LOC100131971			TYK2
			PRKCQ			ULBP1
			TGIF2			ALS2
			C14ORF2			ZC3H12B
			C1ORF115			MGC16384
			AHSA1			DOPEY2
			EZR			MOBKL2C
			WBSCR22			DPYSL4
			HHEX			LOC283755
			CCL26			LOC283953
			TWISTNB			AIRE
			HIST1H4H			DAPP1
			FLJ45337			POLR2J2
			MTERFD1			HS.352677
			SLC2A6			APBB3
			ZNF605			GPR98
			LDHA			DAB2
			HIST2H2BE			LOC202781
			RMND5B			HS.535028
			FUS			CSGALNACT2
			C14ORF112			TACC1
			NDUFS5			ZNF549
			KRTCAP3			CDKN1B
			RNU4ATAC			CITED2
			NUP50			TMEM175
			GCAT			LOC727908
			HSD17B4			LOC649456
			C7ORF47			LEPROT
			RAC2			MXRA7
			SMNDC1			MCART1
			CBX5			LOC100128460
			SLC6A6			WDR41
			OVOL2			PCID2
			AXL			TPT1
			SPINT2			RASSF4
			LOC100130178			ERGIC3
			C2ORF56			CSF2RA
			TMEM31			TMTC1
			COMMD7			MNX1
			ACN9			FAM92A1
			TMEM108			FLJ35390
			CLEC2D			CRYGS
			CHCHD8			B3GNT1
			C12ORF65			LOC728105
			ZNF770			LOC100190939
			ARHGDIB			FAM63A
			CCDC86			SNCAIP
			PDE5A			PLEKHH3
			MST4			ATM
			MSH2			LOC440157
			LOC100127983			CPNE8
			WDR79			LOC730235
			DDX27			REC8
			LOC729200			ANKRD13A
			HIST1H2BE			RCOR3
			ZCCHC7			PHCA
			TRPM4			DCI
			LOC646993			HS.531457
			NUDT5			THBS4
			NOC3L			C4ORF34
			LOC100129759			NCSTN
			DLL3			VCX3A
			LOC648399			LOC100131139
			LOC644919			ZSWIM5
			MYOZ3			FJX1
			TBCA			C22ORF32
			C7ORF30			VPS24
			EBNA1BP2			WDR13
			PCDHB17			PLXNA3
			LOC439949			HS.202577
			CST1			TRIM44
			LAPTM4B			LOC731542
			INSIG1			GPR177
			LSM6			HS.546148
			MDGA2			STAT2
			CDK9			ILVBL
			LOC652904			LOC729603
			CTDSPL			VPS16
			DDX47			KIAA1310
			C16ORF91			HERPUD1
			LOC100128689			CAPRIN2
			RSRC1			SLC2A4RG
			NCCRP1			FAH
			CCDC24			H19
			WNT3A			CFLAR
			WDSOF1			SPSB3
			ACOT11			FAM116B
			LOC729487			LONP2
			C8ORF59			VCX
			LOC643856			KAT2B
			LOC731007			SLC25A28
			CTSF			DFNA5
			METAP1			NNT
			CACNA1I			ULK1
			FTSJ1			STK36
			CCT4			C21ORF55
			FLJ20674			SLC2A10
			CD1D			IL18
			GRPEL1			ABR
			CDC42EP5			BAPX1
			MAPK13			FBXO4
			LOC169834			GAS1
			FAAH2			TSC22D3
			LOC652864			LOC653125
			ERBB3			RALGDS
			CHST9			CHKA
			C13ORF15			ARL2BP
			U2AF1L4			SPIRE1
			FES			LILRB3
			NAT10			FAM188A
			ELL3			CCDC130
			ZNRD1			MAP2
			CRLF1			GOLGB1
			LMCD1			C17ORF85
			BOLA1			HRK
			FHL1			CCDC93
			ZNF643			IL2RB
			LOC644256			FTHL11
			LOC147727			PATE2
			LOC647302			CABLES2
			TEX15			TMEM178
			EIF5B			CYTH2
			BATF3			CCDC53
			ITLN1			XPOT
			LOC729570			HADHA
			IGSF21			TRIM8
			SDHD			LOC100130445
			C18ORF21			SCYL2
			TOMM5			SBF1
			LOC654074			FAM115A
			TMEM54			TRO
			FGF11			PCBD1
			GCNT2			LOC100133177
			CMTM6			MKLN1
			ANAPC10			PLEKHG1
			ZNF227			ACVR1
			AP1M2			CPE
			HEYL			GNPTG
			CSRP2BP			ZNF503
			MRPL50			HS.171171
			GAGE2B			LHCGR
			B9D1			STRADB
			RPPH1			CYB561D1
			ZNF35			ABCA3
			UTP3			GADD45A
			MFAP3L			FTHL16
			LOC100134047			NADSYN1
			LOC651143			FAM40A
			FAM162A			ESYT1
			SLC30A3			XBP1
			TASP1			LOC649639
			TRIB2			PLEKHA1
			ABHD12B			LOC338758
			LOC100129086			LOC731777
			LOC100128337			NKTR
			MRPS23			PATL1
			OTUD6B			GUSB
			SNORD52			ADCY6
			EPPB9			SLC35E3
			SAV1			RAGE
			SLC38A5			RAB32
			HS.567759			SIDT2
			LOC202227			FLJ22795
			BCL2L1			EYA1
			CDH26			IL10RB
			SMAGP			HAGH
			SDHB			YPEL5
			TMEM155			SCRN1
			LOC653276			TINF2
			TXNDC12			CRABP2
			SUCLG2
			DPPA5
			DLAT
			PCDHB12
			MRPL42
			PTH1R
			ZNF593
			ETS1
			RCC1
			PBX2
			HS.14555
			LOC641860
			GRB7
			LOC644760
			PTDSS1
			GAS7
			SLCO4C1
			TCEB3
			KRT19
			SHRM
			DHX29
			PCNXL2
			CCDC56
			MRPL33
			FLJ10374
			LOC730382
			LCK
			TMEM33
			FGF13
			UTP11L
			GPBP1L1
			SF3B4
			FAM46C
			LOC642464
			RAB17
			TFB2M
			MYCBP
			F3
			LOC284422
			HS.195389
			FGF19
			COX7A1
			LOC441743
			ASCL2
			PDHX
			LOC647150
			HS.524129

## Sheet: GSEA GO
KD 1							OE 1
Gene Set Name	# Genes in Gene Set (K)	Description	# Genes in Overlap (k)	k/K	p value		BENPORATH_ES_1	379	Set 'ES exp1': genes overexpressed in human embryonic stem cells according to 5 or more out of 20 profiling studies.	9	0.0237	2.88e-08
MULTICELLULAR_ORGANISMAL_DEVELOPMENT	1049	Genes annotated by the GO term GO:0007275. The biological process whose specific outcome is the progression of an organism over time from an initial condition (e.g. a zygote or a young adult) to a later condition (e.g. a multicellular animal or an aged adult).	34	0.0324	9.03e-08		GOBERT_OLIGODENDROCYTE_DIFFERENTIATION_UP	570	Genes up-regulated during later stage of differentiation of Oli-Neu cells (oligodendroglial precursor) in response to PD174265 [PubChemID=4709].	10	0.0175	7.84e-08
SYSTEM_DEVELOPMENT	861	Genes annotated by the GO term GO:0048731. The process whose specific outcome is the progression of an organismal system over time, from its formation to the mature structure. A system is a regularly interacting or interdependent group of organs or tissues that work together to carry out a given biological process.	30	0.0348	1.17e-07		WONG_EMBRYONIC_STEM_CELL_CORE	335	The 'core ESC-like gene module': genes coordinately up-regulated in a compendium of mouse embryonic stem cells (ESC) which are shared with the human ESC-like module.	8	0.0239	1.73e-07
ANATOMICAL_STRUCTURE_MORPHOGENESIS	376	Genes annotated by the GO term GO:0009653. The process by which anatomical structures are generated and organized. Morphogenesis pertains to the creation of form.	15	0.0399	4.04e-05		CELL_CYCLE_PHASE	170	Genes annotated by the GO term GO:0022403. A cell cycle process comprising the steps by which a cell progresses through one of the biochemical and morphological phases and events that occur during successive cell replication or nuclear replication events.	3	0.0176	0.00433
BENPORATH_ES_1	379	Set 'ES exp1': genes overexpressed in human embryonic stem cells according to 5 or more out of 20 profiling studies.	67	0.1768	0		SEQUENCE_SPECIFIC_DNA_BINDING	58	Genes annotated by the GO term GO:0043565. Interacting selectively with DNA of a specific nucleotide composition, e.g. GC-rich DNA binding, or with a specific sequence motif or type of DNA e.g. promotor binding or rDNA binding.	2	0.0345	0.00561
KD 2							OE 2
BENPORATH_NANOG_TARGETS	988	Set 'Nanog targets': genes upregulated and identified by ChIP on chip as Nanog [GeneID=79923] transcription factor targets in human embryonic stem cells.	69	0.0698	0		BHATTACHARYA_EMBRYONIC_STEM_CELL	89	The 'stemnes' signature: genes up-regulated and common to 6 human embryonic stem cell lines tested.	8	0.0899	4.21e-10
BENPORATH_SOX2_TARGETS	734	Set 'Sox2 targets': genes upregulated and identified by ChIP on chip as SOX2 [GeneID=6657] transcription factor targets in human embryonic stem cells.	56	0.0763	0		BENPORATH_ES_1	379	Set 'ES exp1': genes overexpressed in human embryonic stem cells according to 5 or more out of 20 profiling studies.	29	0.0765	0
BENPORATH_ES_1	379	Set 'ES exp1': genes overexpressed in human embryonic stem cells according to 5 or more out of 20 profiling studies.	67	0.1768	0		CELL_MIGRATION	96	Genes annotated by the GO term GO:0016477. The orderly movement of cells from one site to another, often during the development of a multicellular organism.	4	0.0417	0.0003
NUCLEOBASENUCLEOSIDENUCLEOTIDE_AND_NUCLEIC_ACID_METABOLIC_PROCESS	1244	Genes annotated by the GO term GO:0006139. The chemical reactions and pathways involving nucleobases, nucleosides, nucleotides and nucleic acids.	54	0.0434	1.73e-07		DNA_MODIFICATION	11	Genes annotated by the GO term GO:0006304. The covalent alteration of one or more nucleotide sites in DNA, resulting in a change in its properties.	2	0.1818	0.000587
RNA_METABOLIC_PROCESS	841	Genes annotated by the GO term GO:0016070. The chemical reactions and pathways involving RNA, ribonucleic acid, one of the two main type of nucleic acid, consisting of a long, unbranched macromolecule formed from ribonucleotides joined in 3',5'-phosphodiester linkage.	39	0.0464	2e-06
NUCLEUS	1430	Genes annotated by the GO term GO:0005634. A membrane-bounded organelle of eukaryotic cells in which chromosomes are housed and replicated. In most cells, the nucleus contains all of the cell's chromosomes except the organellar chromosomes, and is the site of RNA synthesis and processing. In some species, or in specialized cell types, RNA metabolism or DNA replication may be absent.	55	0.0385	5.38e-06
KD 3							OE 3
LU_EZH2_TARGETS_DN	414	Genes down-regulated in SKOV3ip1 cells (ovarian cancer) upon knockdown of EZH2 [GeneID=2146] by RNAi.	47	0.1087	0		PEPTIDE_METABOLIC_PROCESS	10	Genes annotated by the GO term GO:0006518. The chemical reactions and pathways involving peptides, compounds of two or more amino acids where the alpha carboxyl group of one is bound to the alpha amino group of another.	2	0.2	0.00158
NUYTTEN_EZH2_TARGETS_UP	1037	Genes up-regulated in PC3 cells (prostate cancer) after knockdown of EZH2 [GeneID=2146] by RNAi.	56	0.054	4.31e-14		REGULATION_OF_GENE_EXPRESSION	673	Genes annotated by the GO term GO:0010468. Any process that modulates the frequency, rate or extent of gene expression. Gene expression is the process in which a gene's coding sequence is converted into a mature gene product or products (proteins or RNA). This includes the production of an RNA transcript as well as any processing to produce a mature RNA product or an mRNA (for protein-coding gene…	11	0.0163	0.00272
REGULATION_OF_GENE_EXPRESSION	673	Genes annotated by the GO term GO:0010468. Any process that modulates the frequency, rate or extent of gene expression. Gene expression is the process in which a gene's coding sequence is converted into a mature gene product or products (proteins or RNA). This includes the production of an RNA transcript as well as any processing to produce a mature RNA product or an mRNA (for protein-coding gene…	28	0.0416	4.31e-05		REGULATION_OF_HOMEOSTATIC_PROCESS	14	Genes annotated by the GO term GO:0032844. Any process that modulates the frequency, rate, or extent of a homeostatic process.	2	0.1429	0.00314
CELL_DEVELOPMENT	577	Genes annotated by the GO term GO:0048468. The process whose specific outcome is the progression of the cell over time, from its formation to the mature structure. Cell development does not include the steps involved in committing a cell to a specific fate.	25	0.0433	5.78e-05		MULTICELLULAR_ORGANISMAL_DEVELOPMENT	1049	Genes annotated by the GO term GO:0007275. The biological process whose specific outcome is the progression of an organism over time from an initial condition (e.g. a zygote or a young adult) to a later condition (e.g. a multicellular animal or an aged adult).	16	0.0153	0.000659
ANATOMICAL_STRUCTURE_DEVELOPMENT	1013	Genes annotated by the GO term GO:0048856. The biological process whose specific outcome is the progression of an anatomical structure from an initial condition to its mature state. This process begins with the formation of the structure and ends with the mature structure, whatever form that may be including its natural destruction. An anatomical structure is any biological entity that occupies s…	36	0.0355	9.79e-05		CHROMATIN_BINDING	32	Genes annotated by the GO term GO:0003682. Interacting selectively with chromatin, the network of fibers of DNA and protein that make up the chromosomes of the eukaryotic nucleus during interphase.	3	0.0938	0.000943
REGULATION_OF_CELLULAR_METABOLIC_PROCESS	787	Genes annotated by the GO term GO:0031323. Any process that modulates the frequency, rate or extent of the chemical reactions and pathways by which individual cells transform chemical substances.	30	0.0381	0.000112
APOPTOSIS_GO	431	Genes annotated by the GO term GO:0006915. A form of programmed cell death induced by external or internal signals that trigger the activity of proteolytic caspases, whose actions dismantle the cell and result in cell death. Apoptosis begins internally with condensation and subsequent fragmentation of the cell nucleus (blebbing) while the plasma membrane remains intact. Other characteristics of a…	20	0.0464	0.000127
PROGRAMMED_CELL_DEATH	432	Genes annotated by the GO term GO:0012501. Cell death resulting from activation of endogenous cellular processes.	20	0.0463	0.000131
REGULATION_OF_METABOLIC_PROCESS	799	Genes annotated by the GO term GO:0019222. Any process that modulates the frequency, rate or extent of the chemical reactions and pathways within a cell or an organism.	30	0.0375	0.000146
REGULATION_OF_APOPTOSIS	341	Genes annotated by the GO term GO:0042981. Any process that modulates the occurrence or rate of cell death by apoptosis.	17	0.0499	0.000173
